# Supplementary material for: What bycatch tells us about the diet of harbor and gray seals and overlap with commercial fishermen
Source: Frontiers journal article supplement (doi:10.3389/fcosc.2024.1377673), 2024-04-10
Supplement: Data_Sheet_1.ZIP [file Data_Sheet_1.ZIP]

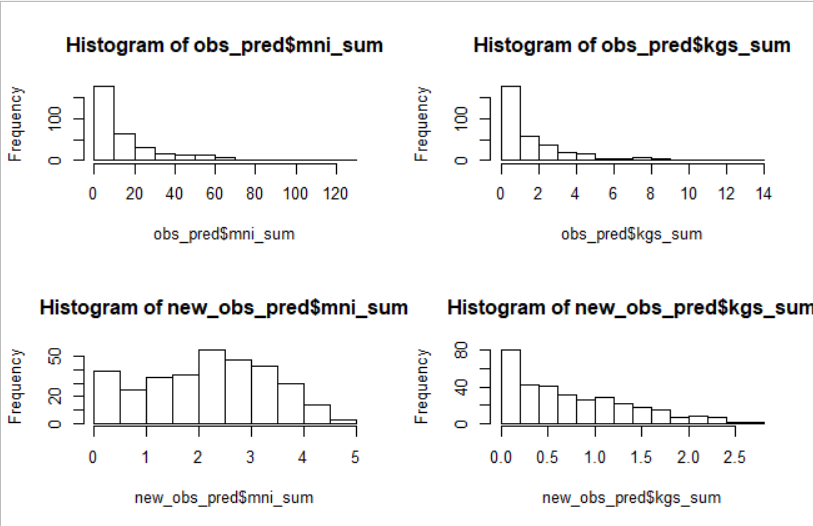


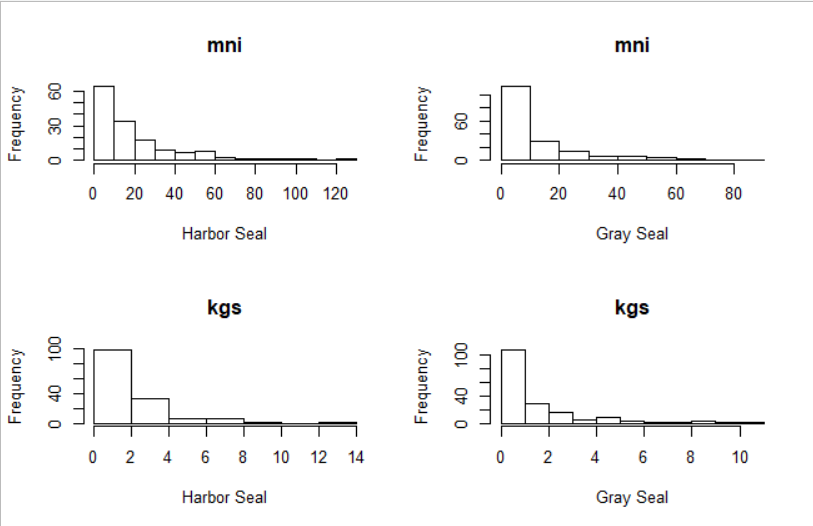

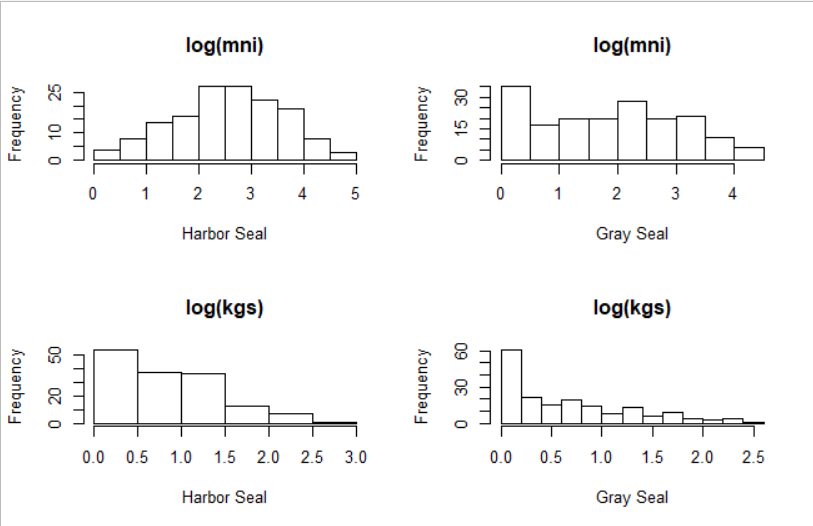


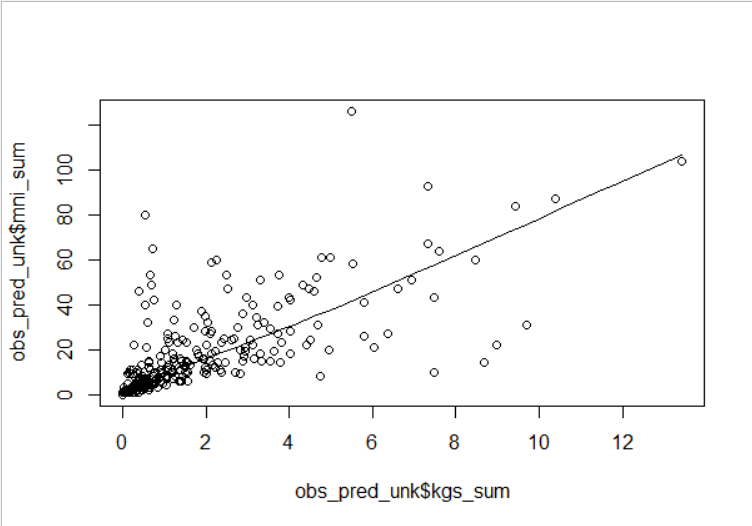

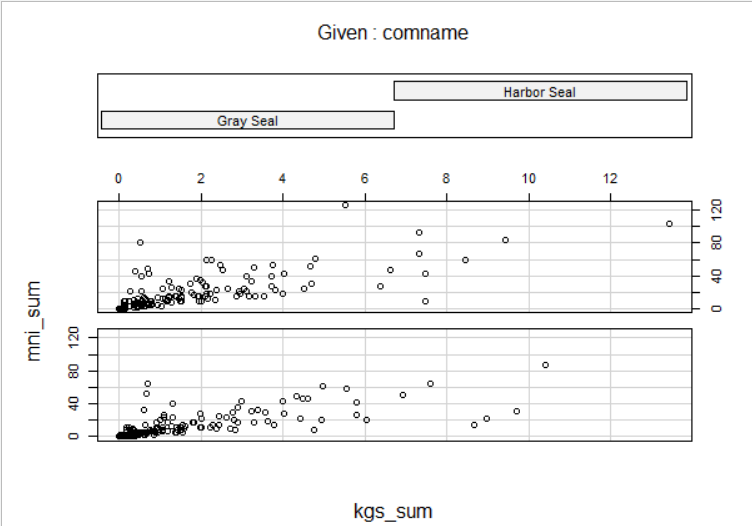


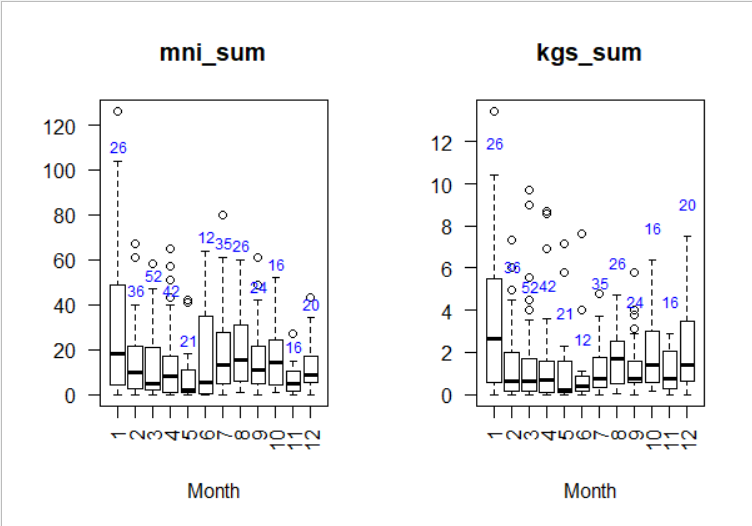


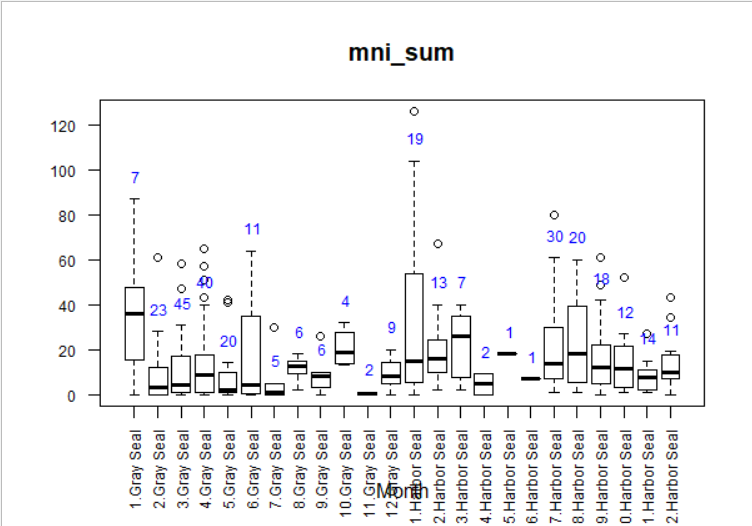


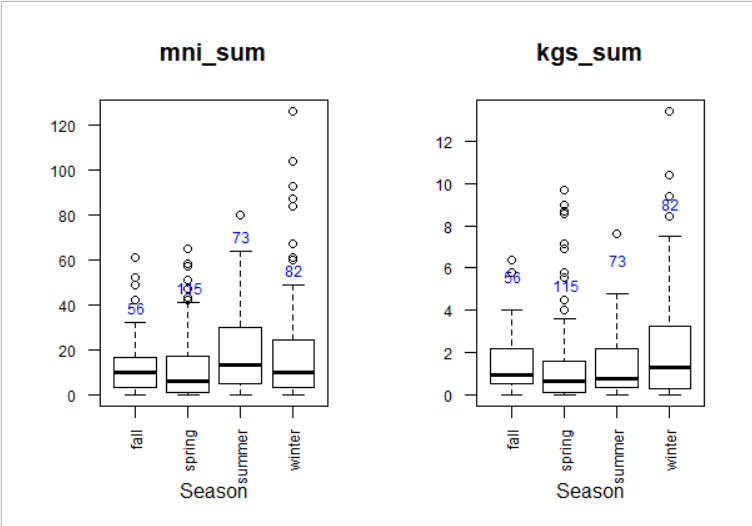


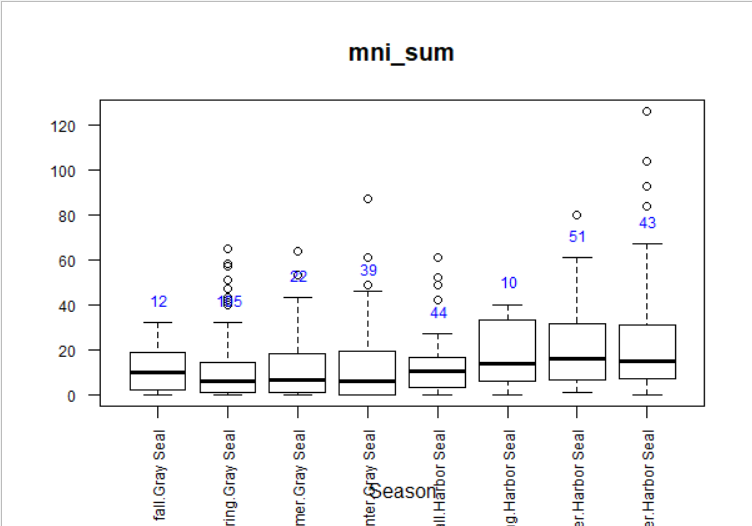


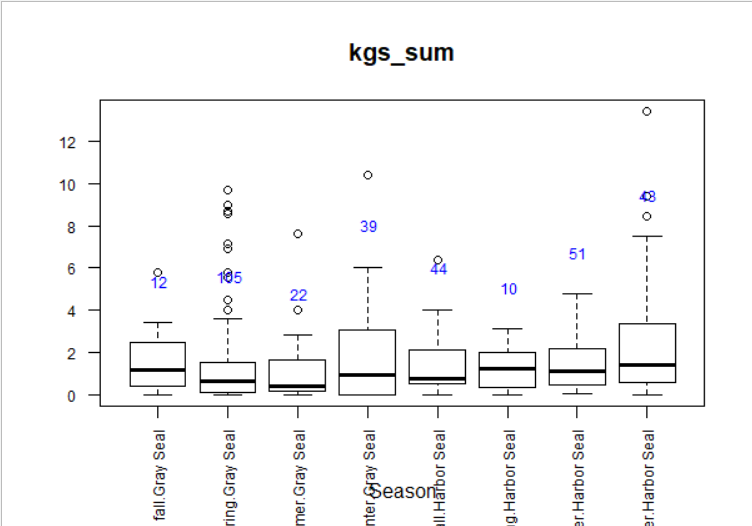


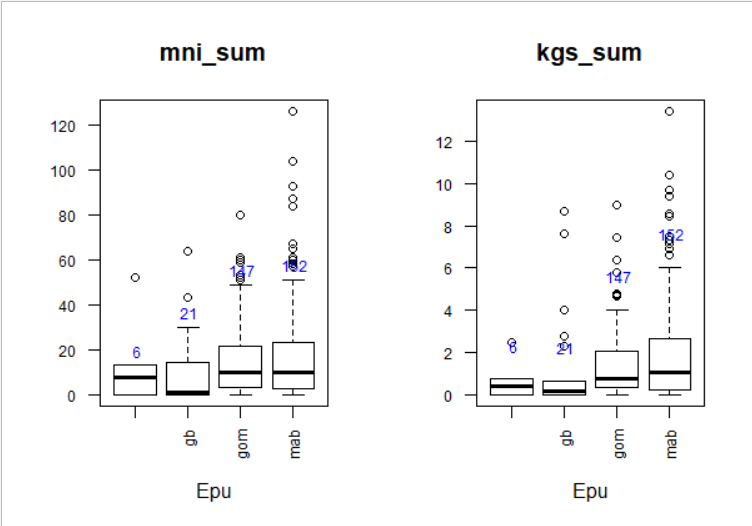


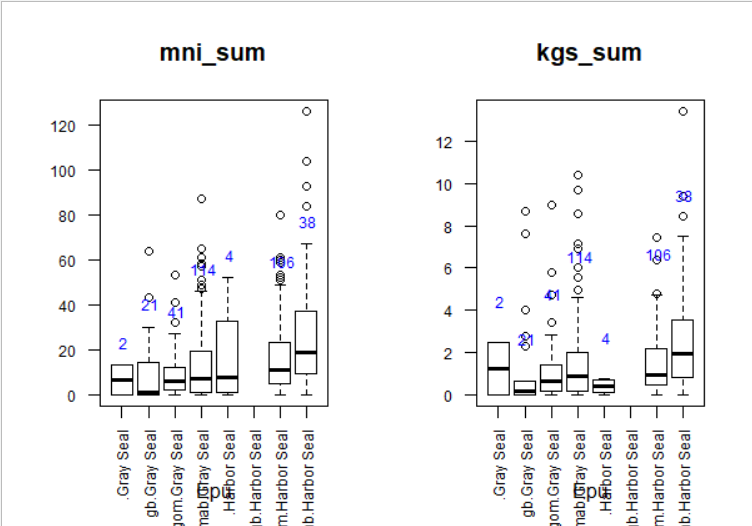


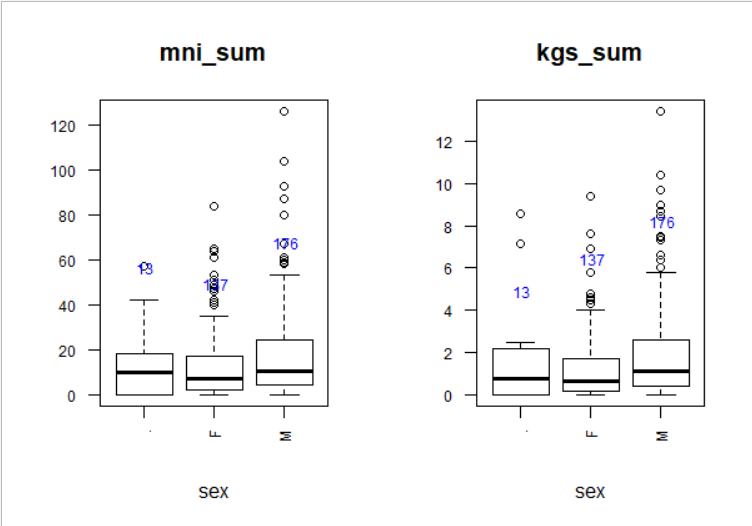


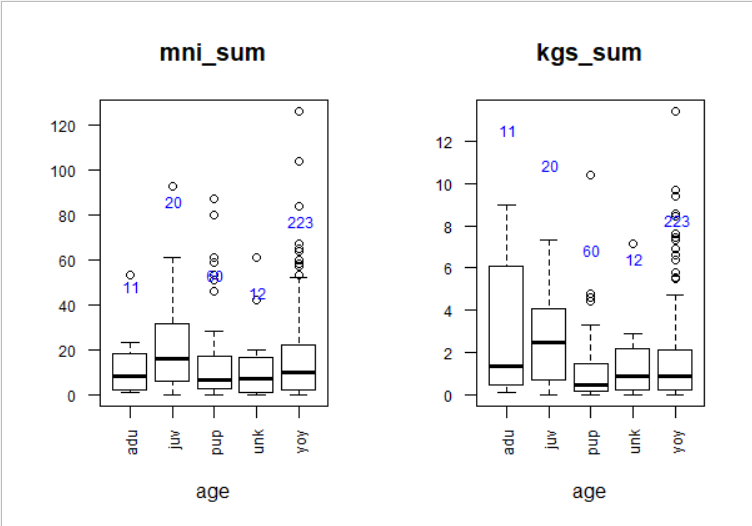


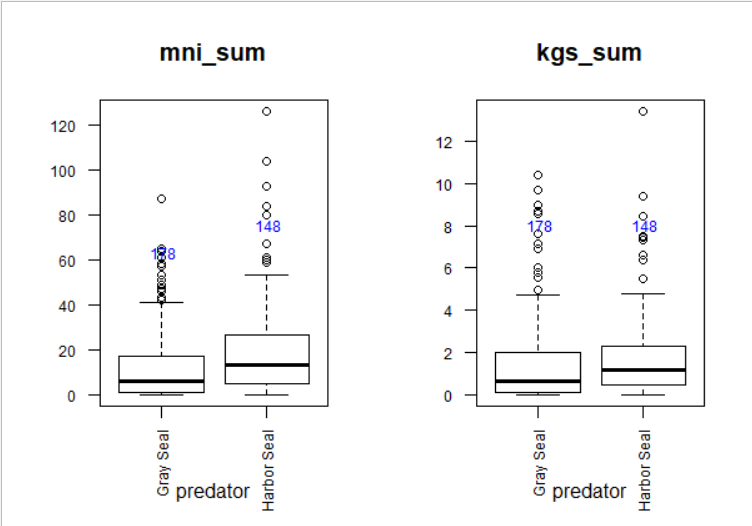


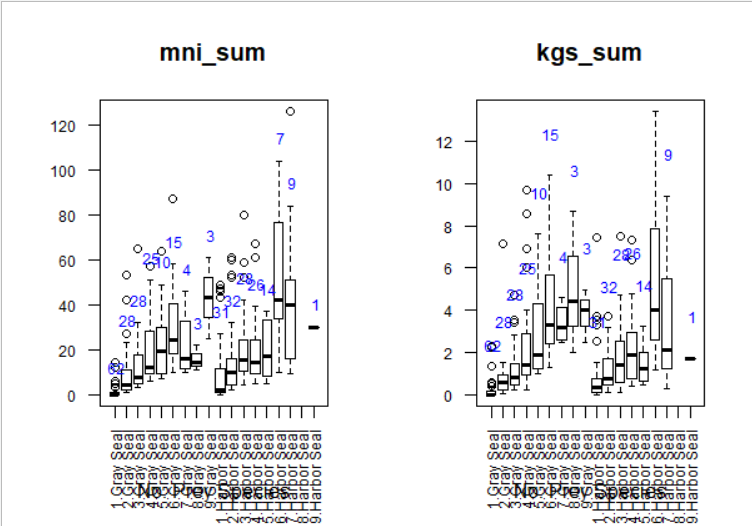

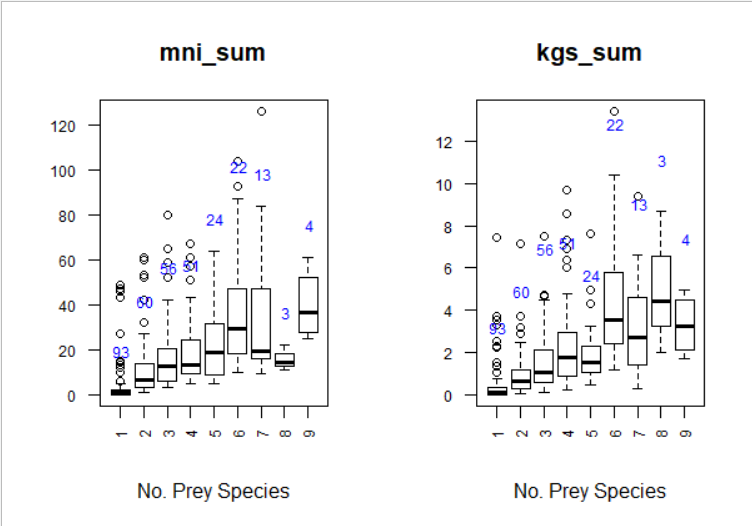


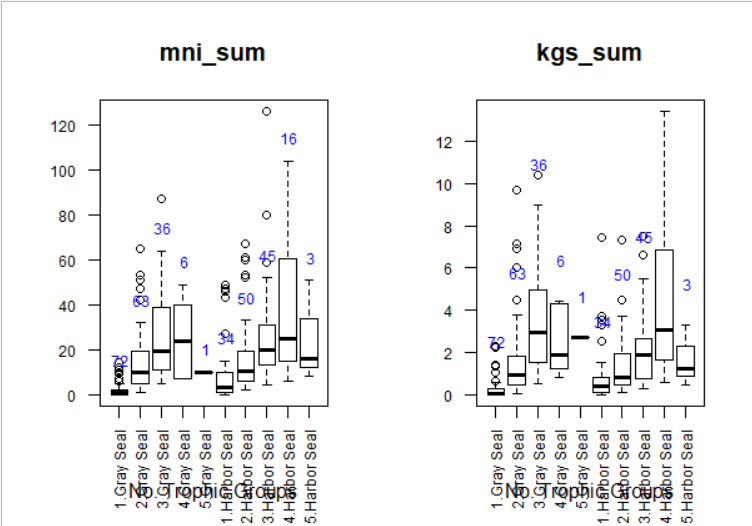


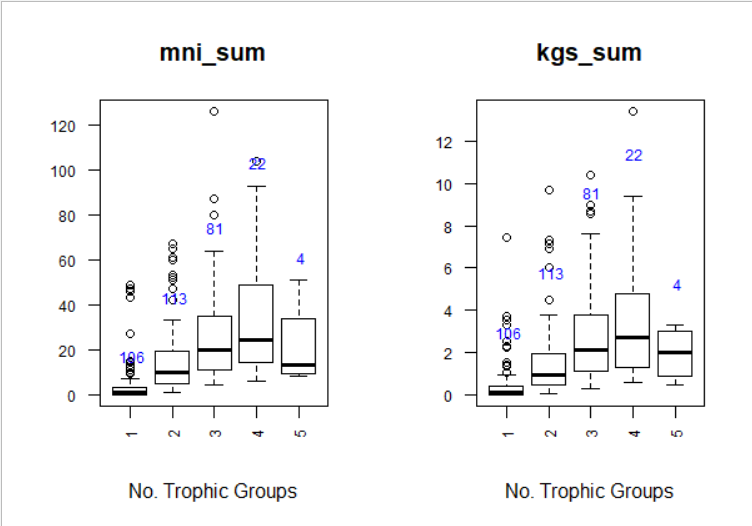


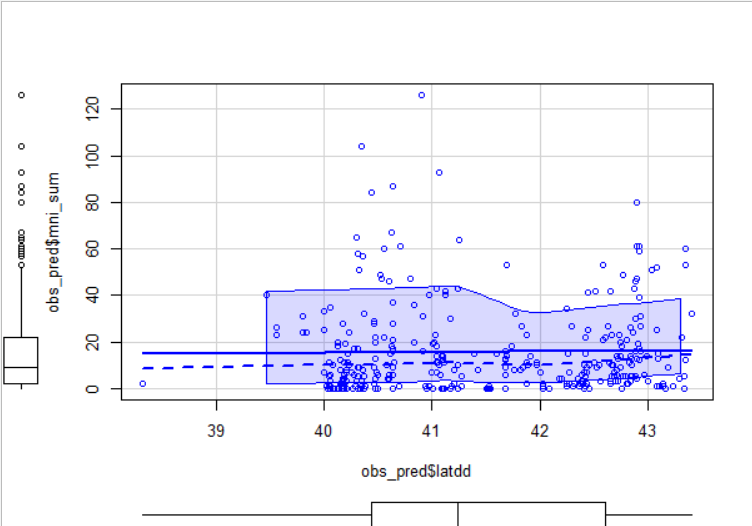


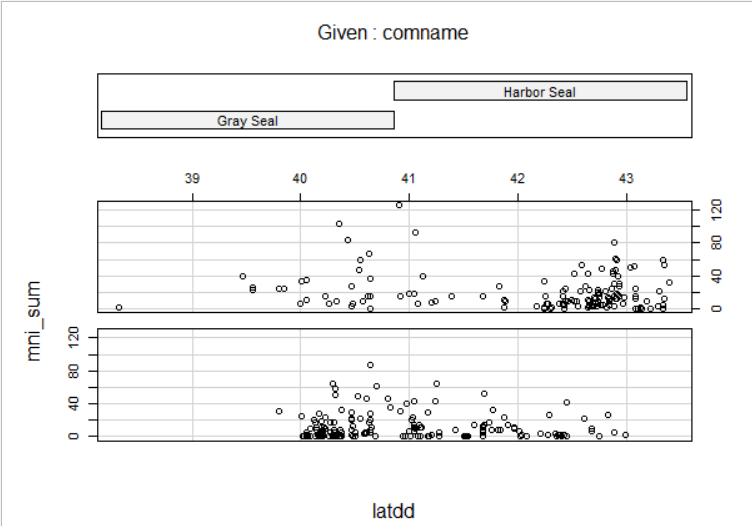


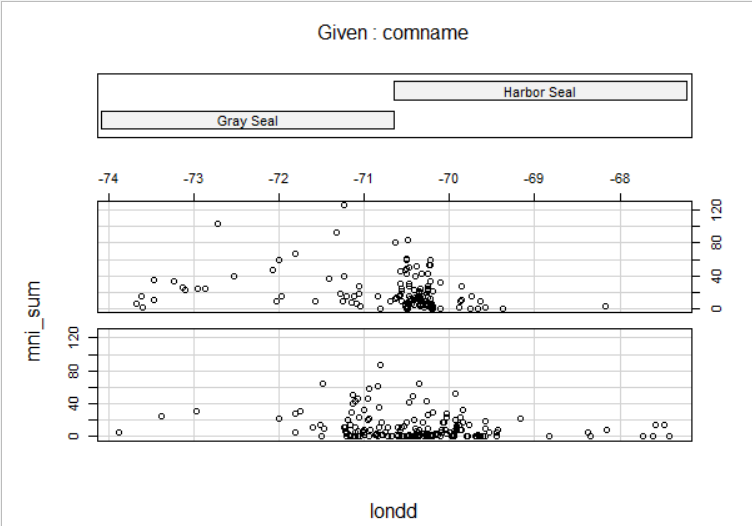

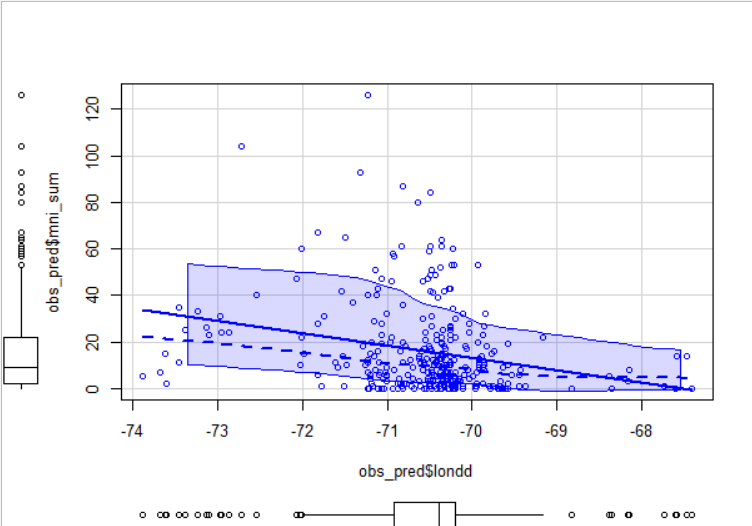


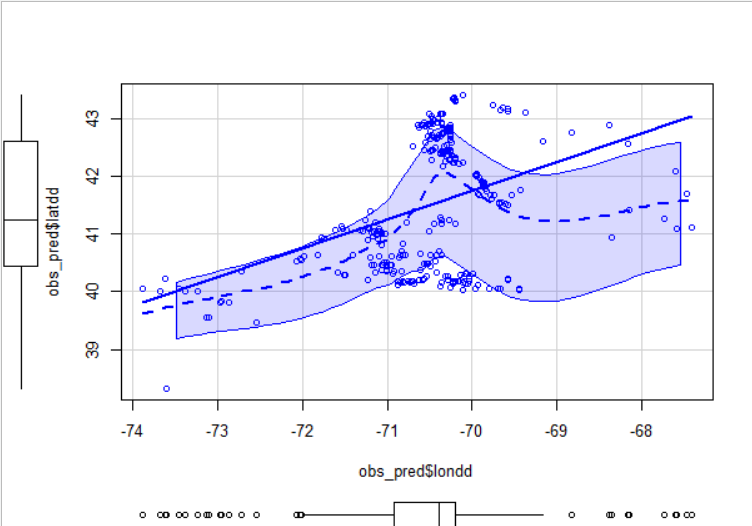


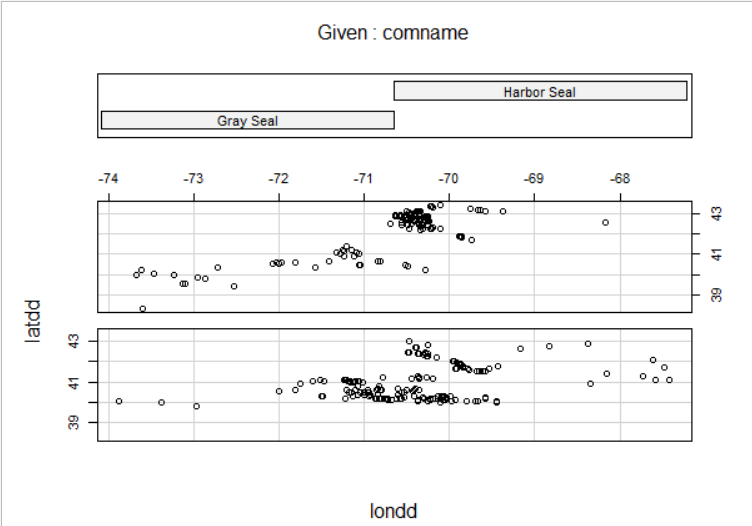


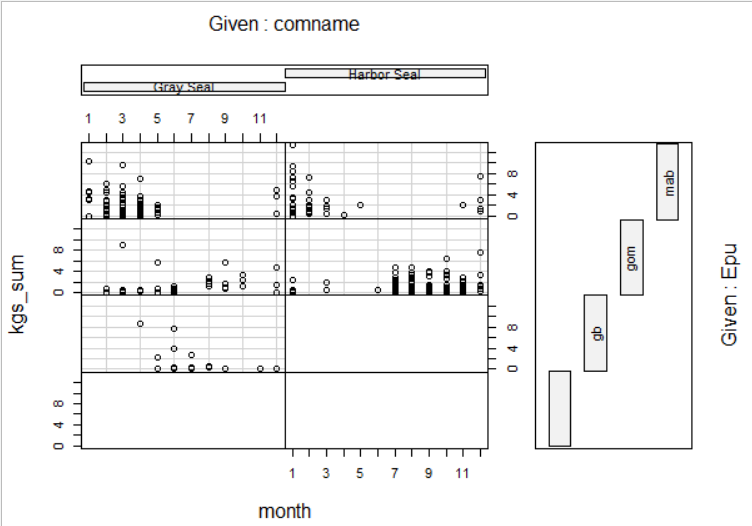

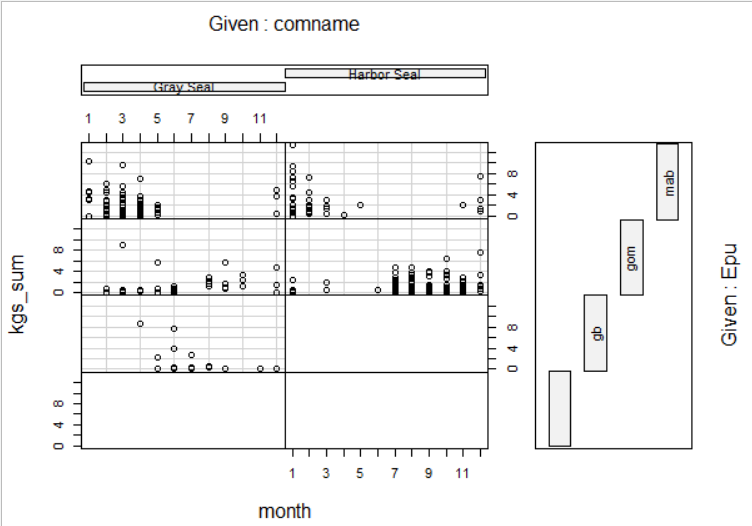


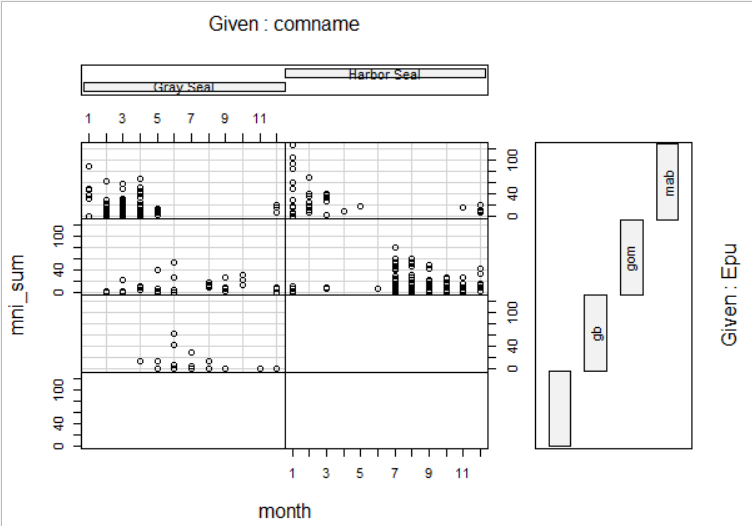


Supplementary Fig. S2. Diagnostic exploratory figures of prey minimum number (mni) and kgs by various factors.
