# Supplementary material for: What bycatch tells us about the diet of harbor and gray seals and overlap with commercial fishermen
Source: Frontiers journal article supplement (doi:10.3389/fcosc.2024.1377673), 2024-04-10
Supplement: Data_Sheet_2.ZIP [file Data_Sheet_2.ZIP]

## Sheet: Supplementary Table S3
N = no. stomach samples; md = median; q25 = 25% quantile; q75 = 75% quantile
	Samples co-occur; Bold reflects where n atleast 3 for either predator
	Samples don't co-occur
	Single factor comparison - ignores all other factors
Gray Seal											Harbor Seal
Epu	season	age	sex	N_stomach	md_mni	md_kgs	q25_mni	q75_mni	q25_mni	q75_mni	Epu	season	age	sex	N_stomach	md_mni	md_kgs	q25_mni	q75_mni	q25_mni	q75_mni
gb	fall	yoy	F	1	1	0.1519	1	1	0.1519	0.1519
gb	spring	adu	M	1	14	8.679	14	14	8.679	8.679
gb	spring	yoy	M	2	7.5	1.18975	4	11	0.643425	1.73608
gb	summer	yoy	F	5	8	0.334	5	30	0.2738	2.7683
gb	summer	yoy	M	3	15	0.6353	8	29	0.48745	2.31795
gom	fall	adu	F								gom	fall	adu	F	1	2	0.4424	2	2	0.4424	0.4424
gom	fall	adu	M	1	23	1.3123	23	23	1.3123	1.3123	gom	fall	adu	M	1	1	0.094	1	1	0.094	0.094
gom	fall	juv	M	2	22.5	2.91715	18	27	2.68023	3.15408	gom	fall	juv	M	1	3	0.5334	3	3	0.5334	0.5334
gom	fall	yoy	F	3	7	0.8572	5	10	0.739	1.65285	gom	fall	yoy	F	15	15	1.195	4	22	0.3644	3.0984
gom	fall	yoy	M	3	10	1.5686	10	18	1.26505	3.6891	gom	fall	yoy	M	20	10	0.83605	5	14	0.627975	1.49845
gom	spring	adu	M	1	22	8.9754	22	22	8.9754	8.9754	gom	spring	adu	M
gom	spring	juv	M	2	6	0.6789	6	6	0.6078	0.75	gom	spring	juv	M
gom	spring	yoy	F	8	2	0.1228	2	10	0.0803	0.262925	gom	spring	yoy	F	2	7.5	1.2831	7	8	0.915	1.6512
gom	spring	yoy	M	3	2	0.3288	2	2	0.2333	0.4043	gom	spring	yoy	M
gom	summer	adu	F	2	27	0.53315	14	40	0.465425	0.600875	gom	summer	adu	F
gom	summer	juv	M	1	12	2.2103	12	12	2.2103	2.2103	gom	summer	juv	M
gom	summer	pup	F								gom	summer	pup	F	12	9.5	0.83375	5	14	0.223175	1.28018
gom	summer	pup	M								gom	summer	pup	M	19	14	0.492	6	35	0.38715	1.687
gom	summer	yoy	F	3	13	1.6062	11	20	1.3475	2.2176	gom	summer	yoy	F	4	23	1.84085	15	33	1.4759	2.00885
gom	summer	yoy	M	3	4	0.3412	4	11	0.3255	0.76435	gom	summer	yoy	M	15	27	2.2511	14	43	0.772	3.72415
gom	winter	adu	M	2	8	3.0854	8	8	2.25525	3.91555	gom	winter	adu	M
gom	winter	pup	F	1	3	0.6474	3	3	0.6474	0.6474	gom	winter	pup	F
gom	winter	pup	M	1	6	1.4114	6	6	1.4114	1.4114	gom	winter	pup	M
gom	winter	yoy	F								gom	winter	yoy	F	4	9.5	0.81125	3	20	0.21895	1.84105
gom	winter	yoy	M								gom	winter	yoy	M	6	9.5	0.9895	8	13	0.59685	2.0432
mab	fall	yoy	M								mab	fall	yoy	M	1	14	1.7954	14	14	1.7954	1.7954
mab	spring	adu	M								mab	spring	adu	M	1	2	0.348	2	2	0.348	0.348
mab	spring	juv	M	2	16	1.74725	12	20	1.39942	2.09508	mab	spring	juv	M
mab	spring	yoy	F	28	8	0.8287	4	18	0.349725	1.49348	mab	spring	yoy	F	1	9	0.1198	9	9	0.1198	0.1198
mab	spring	yoy	M	38	8.5	0.9982	3	17	0.27405	1.74323	mab	spring	yoy	M	5	33	1.8864	26	37	1.264	2.1267
mab	winter	adu	M								mab	winter	adu	M	1	8	0.7326	8	8	0.7326	0.7326
mab	winter	juv	F	1	49	4.3326	49	49	4.3326	4.3326	mab	winter	juv	F
mab	winter	juv	M	6	26	4.3689	20	35	3.37743	4.96355	mab	winter	juv	M	1	93	7.3261	93	93	7.3261	7.3261
mab	winter	pup	F	9	10	0.9314	3	13	0.2864	2.7108	mab	winter	pup	F
mab	winter	pup	M	7	9	0.4376	4	24	0.40015	3.0615	mab	winter	pup	M
mab	winter	yoy	F								mab	winter	yoy	F	13	15	1.409	10	28	0.554	2.1349
mab	winter	yoy	M								mab	winter	yoy	M	13	19	3.1664	7	60	1.036	6.6112
Gray Seal											Harbor Seal
Can see box plots of he univariate statistics below in 'Supplementary Fig. S2 - Diagnostic figures_draft.docx'
GB				12	11	0.48745	2	19	0.246925	3.07638	GB
GoM				36	8	0.83915	3	13	0.33165	1.75723	GoM				100	12.5	0.93855	5	24	0.447275	2.14355
SNE/NMAB				91	10	1.0516	4	20	0.38675	2.5291	SNE/NMAB				36	18.5	1.8409	9	38	0.776025	3.25905
	Fall			10	11.5	1.44045	8	21	0.883275	2.4472		Fall			39	11	0.7404	4	16	0.54365	1.8737
	Spring			85	7	0.8211	2	17	0.2094	1.8058		Spring			9	18	1.264	9	33	0.5469	2.0193
	Summer			17	12	0.6686	4	27	0.3396	2.2103		Summer			50	16	1.1013	6	32	0.426625	2.21143
	Winter			27	11	1.9699	6	24	0.5425	4.24285		Winter			38	15.5	1.4716	7	35	0.643275	3.457
		Adult		7	14	1.4251	8	22	0.99045	6.71235			Adult		4	2	0.3952	2	4	0.2845	0.51495
		Juvenile		14	20.5	3.0663	12	32	2.26845	4.19725			Juvenile		2	48	3.92975	26	70	2.23157	5.62793
		Pup		18	7.5	0.9201	3	16	0.384475	2.52557			Pup		31	13	0.5287	5	22	0.328	1.4986
		Yoy		100	8	0.82055	2	17	0.236525	1.6561			Yoy		99	15	1.409	8	29	0.6153	2.94045
			Female	61	8	0.7111	2	17	0.1988	1.8423				Female	52	13	1.1591	7	23	0.3798	2.14055
			Male	78	9.5	1.2499	4	20	0.433025	2.8727				Male	84	14	1.2051	6	34	0.532225	2.49055
