# Supplementary material for: What bycatch tells us about the diet of harbor and gray seals and overlap with commercial fishermen
Source: Frontiers journal article supplement (doi:10.3389/fcosc.2024.1377673), 2024-04-10
Supplement: Data_Sheet_3.zip [file Data_Sheet_3.zip]

## Sheet: Haddock
	References:
1	McElroy et al. 2019 -		https://doi.org/10.25923/2sgn-mx62
2	Resource Survey Report Bottom Trawl Survey Gulf of Maine ; 5 March – 9 May 2013 ; NOAA FSV Henry B Bigelow (FSV 225)
3	Resource Survey Report Bottom Trawl Survey Gulf of Maine ; 6 September – 19 November 2013 ; NOAA FSV Henry B Bigelow (FSV 225)
4	Resource Survey Report Bottom Trawl Survey Gulf of Maine ; 31 March – 31 May 2014 ; NOAA FSV Henry B. Bigelow (FSV 225)
5	Resource Survey Report Bottom Trawl Survey Gulf of Maine ; 9 September – 14 November 2014 ; NOAA FSV Henry B. Bigelow (FSV 225)
	CRUISE	STATION	SVSPP	INDID	OL	OW	LENGTH	SEX		Seal Haddock Prey Length (cm)	Seal Haddock OL (mm)
	201302	404	74	182702	11.44	4.24	27	1		25	11.16
	201302	385	74	172297	12.77	4.99	27	1		25	10.75
	201302	318	74	138213	12.3	4.32	27	2
	201302	315	74	136953	12.21	4.56	27	2
	201302	376	74	167144	12.61	4.64	27	2
	201302	358	74	157762	12.72	4.65	28	1
	201302	354	74	155827	12.54	5.09	28	1
	201302	318	74	138196	12.47	4.42	28	1
	201302	315	74	137022	12.77	4.89	28	2
	201302	376	74	167401	12.81	4.76	29	2
	201302	358	74	157753	12.31	4.81	29	2
	201302	404	74	182739	12.39	4.58	29	2
	201302	210	74	93723	13.36	4.99	29	1
	201302	390	74	174980	13.06	4.79	29	1
	201302	335	74	145943	12.79	4.73	29	1
	201302	376	74	167395	12.3	5.34	30	1
	201302	385	74	172310	12.63	4.81	30	1
	201302	385	74	172292	13.73	5.24	30	1
	201302	404	74	182728	14.55	5.57	30	2
	201302	315	74	137086	13.7	5.16	30	2
	201302	335	74	145982	13.68	4.95	30	2
	201302	393	74	176504	12.92	4.85	31	2
	201302	376	74	167387	13.64	5.41	31	2
	201302	376	74	167372	12.7	5.06	31	2
	201302	354	74	155795	12.48	5.15	31	1
	201302	354	74	155947	12.95	5.41	31	1
	201302	335	74	145997	14.26	5.12	31	1
	201302	376	74	167380	15.16	5.55	32	2
	201302	358	74	157619	14.63	5.33	32	2
	201302	391	74	175409	13.46	5.52	32	2
	201302	384	74	171574	13.45	5.02	32	1
	201302	384	74	171569	13.99	5.08	32	1
	201302	393	74	176435	14.05	5.09	32	1
	201302	363	74	161130	14.13	5.17	33	2
	201302	393	74	176405	14.16	5.29	33	2
	201302	335	74	145947	14.13	5.02	33	2
	201302	385	74	172273	14.58	5.63	33	1
	201302	392	74	176170	14.27	5.19	33	1
	201302	390	74	174897	13.91	5.28	33	1
	201302	376	74	167389	14.19	5.58	34	2
	201302	393	74	176452	14.36	5.19	34	2
	201302	393	74	176437	14.32	5.22	34	2
	201302	358	74	157651	15.39	5.95	34	1
	201302	335	74	145940	14.41	5.18	34	1
	201302	390	74	174921	13.04	5.24	34	1
	201302	223	74	98213	15.1	5.72	35	2
	201302	404	74	182708	14.92	5.16	35	2
	201302	285	74	123478	14.31	5.61	35	2
	201302	376	74	167353	15.37	5.77	35	1
	201302	354	74	155774	14.06	5.43	35	1
	201302	390	74	174848	13.66	5.17	35	1
	201302	335	74	145928	14.16	5.24	36	1
	201302	390	74	174865	13.78	4.94	36	1
	201302	221	74	97221	14.67	5.36	36	1
	201302	393	74	176424	14.73	5.37	36	2
	201302	390	74	174857	14.61	5.17	36	2
	201302	335	74	145921	14.32	5.55	36	2
	201302	393	74	176476	15.67	6.17	37	1
	201302	393	74	176502	14.46	5.56	37	1
	201302	376	74	167347	15.64	5.35	37	1
	201302	391	74	175431	14.18	5.65	37	2
	201302	404	74	182802	15.28	5.71	37	2
	201302	376	74	167366	16.17	5.61	37	2
	201302	384	74	171591	15.59	5.82	38	1
	201302	390	74	174835	15.85	5.82	38	1
	201302	393	74	176464	15.52	5.66	38	1
	201302	376	74	167180	16.18	6.2	38	2
	201302	315	74	136963	14.94	5.87	38	2
	201302	392	74	176154	15.45	5.86	38	2
	201302	363	74	161133	15.98	5.57	39	2
	201302	376	74	167360	16.12	5.83	39	2
	201302	393	74	176414	15.53	5.75	39	2
	201302	224	74	98748	15.32	5.79	39	1
	201302	226	74	99183	15.27	5.83	39	1
	201302	335	74	145929	16.63	5.94	39	1
	201302	404	74	182766	15.73	5.72	40	2
	201302	385	74	172263	16.15	6.13	40	2
	201302	393	74	176434	16.3	6.46	40	2
	201302	354	74	155818	15.95	5.94	40	1
	201302	354	74	155751	16.17	6.11	40	1
	201302	390	74	174843	16.12	5.62	40	1
	201302	385	74	172275	16.24	5.72	41	1
	201302	384	74	171563	16.62	5.69	41	1
	201302	390	74	174801	16.48	6.06	41	1
	201302	318	74	138191	16.89	5.92	41	2
	201302	318	74	138185	17.31	5.88	41	2
	201302	226	74	99224	16.22	6.08	41	2
	201302	392	74	176158	16.26	5.97	42	2
	201302	354	74	155785	17.31	6.56	42	2
	201302	390	74	174875	16.29	6.2	42	2
	201302	393	74	176439	16.08	5.68	42	1
	201302	393	74	176404	16.05	5.83	42	1
	201302	335	74	145926	16.15	5.69	42	1
	201302	381	74	170171	16.16	6.04	43	1
	201302	390	74	174863	15.94	5.71	43	1
	201302	389	74	174274	16.01	6.26	43	1
	201302	376	74	167340	16.23	6.12	43	2
	201302	384	74	171566	16.16	6.87	43	2
	201302	393	74	176447	16.12	5.72	43	2
	201302	404	74	182693	16.52	6.52	44	1
	201302	404	74	182688	16.73	6.57	44	1
	201302	354	74	155778	16.07	6.35	44	2
	201302	354	74	155740	16.22	6.07	44	2
	201302	393	74	176420	15.53	5.82	44	2
	201302	310	74	134501	17.09	6.23	45	1
	201302	389	74	174280	17.03	6.32	45	1
	201302	390	74	174878	17.1	6.25	45	1
	201302	354	74	155763	17.03	5.76	45	2
	201302	385	74	172267	17.18	6.1	45	2
	201302	393	74	176459	16.67	6.49	46	2
	201302	315	74	136988	17.23	6.41	46	2
	201302	391	74	175392	16.57	6.45	46	2
	201302	404	74	182794	16.39	6.69	46	1
	201302	358	74	157554	16.59	6.57	47	2
	201302	384	74	171523	16.61	6.47	47	2
	201302	315	74	137021	18.46	6.45	47	2
	201302	393	74	176532	15.65	6.58	47	1
	201302	404	74	182810	17.22	6.26	47	1
	201302	362	74	160703	18.65	6.61	48	2
	201302	390	74	174952	17.91	6.61	48	2
	201302	393	74	176460	18.65	6.34	48	1
	201302	366	74	162471	17.01	6.34	48	1
	201302	389	74	174279	17.31	6.68	49	1
	201302	353	74	155392	17.87	6.61	49	1
	201302	404	74	182715	17.26	6.68	49	2
	201302	285	74	123365	19.34	6.98	49	2
	201302	390	74	174891	18.5	6.2	49	2
	201302	404	74	182684	16.85	6.72	50	1
	201302	389	74	174265	20.16	6.75	50	1
	201302	393	74	176442	18.01	6.84	50	1
	201302	285	74	123418	19.22	6.83	50	2
	201302	363	74	161143	18.99	6.8	51	2
	201302	376	74	167240	17.3	6.79	51	2
	201302	393	74	176483	18.02	7.16	51	2
	201302	389	74	174476	17.64	7.13	51	1
	201302	361	74	160021	19.56	6.97	51	1
	201302	314	74	136150	17.94	6.73	51	1
	201302	310	74	134489	20.61	7.15	52	2
	201302	308	74	133521	19.92	7.56	52	2
	201302	390	74	174894	19.46	7.18	52	1
	201302	389	74	174336	19.39	7.27	53	1
	201302	391	74	175434	20.12	7.03	53	2
	201302	285	74	123444	19.32	6.9	53	2
	201302	390	74	174870	19.16	6.75	53	2
	201302	390	74	174910	19.12	6.7	54	2
	201302	393	74	176438	21.09	7.42	54	2
	201302	347	74	153082	19.96	7.07	54	1
	201302	361	74	160016	18.94	6.89	55	2
	201302	354	74	155743	18.21	7.38	55	2
	201302	285	74	123468	19.38	6.66	55	2
	201302	389	74	174486	18.47	7.25	55	1
	201302	307	74	133052	21.15	7.49	55	1
	201302	393	74	176493	18.28	6.73	55	1
	201302	393	74	176473	18.79	7.16	56	1
	201302	390	74	174879	19.95	7.61	56	1
	201302	332	74	144740	8.1	3.18	15	1
	201302	332	74	144743	10.06	3.85	18	2
	201302	376	74	167147	9.68	3.59	18	2
	201302	331	74	144435	9.12	3.49	18	1
	201302	332	74	144749	9.82	3.86	18	1
	201302	383	74	170833	9.3	3.85	19	2
	201302	384	74	171579	9.24	3.49	19	2
	201302	332	74	144745	9.63	3.67	19	1
	201302	329	74	143864	9.28	3.57	19	1
	201302	363	74	161154	10.13	3.99	20	2
	201302	362	74	160690	9.82	3.77	20	2
	201302	385	74	172303	10.21	4.28	20	1
	201302	315	74	136971	9.9	3.81	20	1
	201302	385	74	172288	10.41	3.89	21	1
	201302	383	74	170824	10.2	3.88	21	1
	201302	315	74	136966	9.86	3.71	21	2
	201302	222	74	97654	9.38	4.01	21	2
	201302	385	74	172278	10.85	4.29	22	1
	201302	222	74	97630	10.59	4.19	22	1
	201302	384	74	171572	10.28	4.11	22	2
	201302	315	74	136958	10.35	3.9	22	2
	201302	383	74	170822	10.56	4.23	23	2
	201302	384	74	171576	10.51	4.24	23	2
	201302	376	74	167157	10.72	4.14	23	1
	201302	376	74	167140	10.73	4.28	23	1
	201302	376	74	167139	11.74	4.71	24	2
	201302	384	74	171585	10.84	4.34	24	2
	201302	221	74	97268	11.36	4.63	24	1
	201302	222	74	97627	11.19	4.37	24	1
	201302	363	74	161421	11.52	4.27	25	1
	201302	224	74	98750	11.27	4.26	25	1
	201302	385	74	172284	11.19	4.21	25	2
	201302	222	74	97640	11.41	4.19	25	2
	201302	363	74	161148	10.53	4.6	26	2
	201302	323	74	140118	10.62	4.47	26	2
	201302	384	74	171589	11.55	4.2	26	2
	201302	385	74	172294	12.01	4.63	26	1
	201302	385	74	172283	12.14	4.6	26	1
	201302	335	74	145988	11.52	4.32	26	1
	201302	335	74	145995	11.96	4.53	27	1
	25141	3	74	257281	19.5	7.61	64	2
	25141	3	74	257282	22.8	8.62	64	1
	25141	3	74	257283	20.83	7.45	61.7	1
	25141	3	74	257284	22.51	8.12	63.1	2
	25141	3	74	257285	19.91	7.06	60	1
	25141	3	74	257286	19.04	7.05	61.1	1
	25141	3	74	257287	20.04	7.1	60.3	1
	25141	6	74	257288	21.32	7.99	63.7	2
	25141	7	74	257289	23.92	8.76	64	1
	25141	7	74	257290	20.91		63.3	1
	25142	24	74	257411	20.54	7.55	60.9	0
	25142	27	74	257439		7.71	62.2	1
	25142	30	74	257458		7.02	60	2
	25142	30	74	257459		7.83	60.8	2
	25142	30	74	257460	20.22	7.62	62.6	2
	25151	1	74	259274	23.08	8.62	71.2	2
	25151	10	74	259256	23.82	8.28	64.1	2
	25151	10	74	259257	21.19	7.81	60.6	2
	25151	13	74	259162	20.47	7.67	60.6	2
	25151	2	74	259151	22.74	8.19	68.9	2
	25151	2	74	259152	20.83	7.19	62.3	1
	25151	2	74	259153		7.34	60.1	1
	25151	2	74	259154		8.31	64.3	2
	25151	2	74	259155		7.77	64.2	2
	25151	2	74	259156	21.47	7.38	64.8	1
	25151	23	74	259205	21.71	7.58	67.6	2
	25151	3	74	259268	19.18	7.61	62.8	2
	25151	3	74	259269	20.02	7.57	62.5	2
	25151	3	74	259270	21.96	8.45	67	2
	25151	3	74	259271	22.57	8.22	66.9	2
	25151	3	74	259272	21.71	7.91	71.9	2
	25151	4	74	259262	19.4	7.51	60.1	1
	25151	4	74	259263	19.8	7.68	60.5	1
	25151	4	74	259264	19.78	7.6	66	2
	25151	6	74	259259		7.64	61.9	2
	25151	6	74	259260	18.25	7.37	60.8	2
	25151	6	74	259261	19.89	7.59	62.3	2
	25151	7	74	259160	20.64	7.9	62.7	1
	25151	9	74	259159	20.44	7.46	60.2	2
	25152	18	74	264006	21.44	8.21	64.1	2
	25152	22	74	264010	19.93	7.71	63.3	2
	25152	22	74	264011	20.38	6.99	62.1	2
	25152	22	74	264012	20	7.54	62.5	2
	25152	22	74	264013	19.4	7.22	60.6	1
	25152	22	74	264014		7.47	62.5	2
	25152	22	74	264015		8.35	61.1	1
	25152	22	74	264051		7.89	65.6	2
	25152	22	74	264052	21.03	7.3	61.4	2
	201302	353	74	155388	20.45	7.68	56	1
	201302	312	74	135420	20.33	7.28	56	2
	201302	313	74	135948	20.2	7.15	56	2
	201302	390	74	174930	20.62	7.25	57	1
	201302	389	74	174473	20.4	7.02	57	1
	201302	353	74	155390	20.72	7.71	57	1
	201302	310	74	134483	21.24	7.23	57	2
	201302	324	74	140877	20.75	7.72	58	2
	201302	390	74	174846	21.49	7.61	58	1
	201302	404	74	182780	21.44	7.43	59	2
	201302	354	74	155798	21.21	7.83	59	2
	201302	392	74	176165	19.93	7.42	59	2
	201302	404	74	182782	23.71	7.44	60	2
	201302	361	74	160014	18.92	7.25	61	2
	201302	392	74	176168	21.23	7.19	61	1
	201302	389	74	174468	20.25	7.61	62	1
	201302	404	74	182770	21.14	8.14	62	1
	201302	393	74	176433	21.52	7.96	62	1
	201302	404	74	182786	22.31	8.17	66	1
	201304	371	74	351142	7.45	2.82	14	2
	201304	359	74	345005	7.51	2.92	14	2
	201304	245	74	280456	7.23	2.78	14	1
	201304	245	74	280467	7.22	2.74	14	1
	201304	379	74	356163	7.78	3.08	15	1
	201304	248	74	282316	7.76	3.04	15	1
	201304	245	74	280458	7.22	2.97	15	2
	201304	303	74	316931	7.08	2.67	15	2
	201304	313	74	321718	7.74	3.06	16	2
	201304	386	74	360692	8.48	3.3	16	2
	201304	359	74	345009	8.14	3.27	16	1
	201304	371	74	351205	8.3	3.19	16	1
	201304	245	74	280449	8.29	3.1	17	2
	201304	303	74	316920	8.45	3.13	17	2
	201304	379	74	356145	7.74	2.99	17	1
	201304	379	74	356152	8.52	3.11	17	1
	201304	359	74	345013	8.79	3.34	18	2
	201304	317	74	323506	8.46	3.12	18	2
	201304	303	74	316884	8.63	3.22	18	1
	201304	359	74	345000	8.63	3.3	18	1
	201304	378	74	355382	8.69	3.44	19	2
	201304	371	74	351166	9.09	3.46	19	2
	201304	313	74	321786	8.45	3.24	19	1
	201304	371	74	351219	9.45	3.57	19	1
	201304	348	74	338966	9.09	3.52	20	2
	201304	378	74	355375	8.59	3.66	20	2
	201304	378	74	355379	8.65	3.96	20	1
	201304	359	74	345018	8.69	3.47	20	1
	201304	372	74	352044	9.48	3.74	21	2
	201304	346	74	337968	8.64	3.54	21	2
	201304	346	74	338018	9.88	3.88	21	1
	201304	383	74	358731	9.16	3.29	21	1
	201304	413	74	377792	10.04	3.78	22	1
	201304	383	74	358463	12.07	4.72	22	1
	201304	382	74	357758	10.82	4.19	22	2
	201304	253	74	284182	12.3	4.62	22	2
	201304	313	74	321705	10.77	4.21	23	1
	201304	383	74	358468	12.09	4.35	23	2
	201304	383	74	358493	11.48	4.64	24	1
	201304	383	74	358304	11.93	4.45	25	1
	201304	403	74	370265	11.67	4.57	25	2
	201304	303	74	316704	12.13	4.66	26	2
	201304	375	74	353721	12.24	4.63	27	2
	201304	403	74	370204	13.01	4.68	27	2
	201304	383	74	358400	12.09	4.55	27	1
	201304	303	74	316692	12.4	4.69	27	1
	201304	403	74	370129	12.66	4.72	28	1
	201304	384	74	358851	12.54	4.78	28	1
	201304	382	74	357609	12.77	4.66	28	1
	201304	359	74	345003	11.74	4.68	28	2
	201304	384	74	358895	11.92	4.64	28	2
	201304	403	74	370168	12.53	4.93	28	2
	201304	413	74	377663	12.76	5.06	29	1
	201304	411	74	376335	12.96	5.03	29	1
	201304	384	74	358866	13.57	4.91	29	1
	201304	411	74	375868	13.28	5.15	29	2
	201304	383	74	358280	12.22	4.66	29	2
	201304	359	74	344998	12.64	5.01	29	2
	201304	382	74	357527	11.56	5.06	30	2
	201304	313	74	321670	12.37	4.87	30	2
	201304	348	74	338789	13.37	4.76	30	2
	201304	382	74	357631	12.86	4.81	30	1
	201304	303	74	316680	12.84	4.98	30	1
	201304	260	74	288173	12.84	4.73	30	1
	201304	411	74	375919	12.35	5.01	31	1
	201304	361	74	346281	12.69	4.87	31	2
	201304	383	74	358382	12.39	4.74	31	2
	201304	365	74	348453	13.94	5.05	31	1
	201304	383	74	358256	12.96	4.81	31	1
	201304	384	74	358849	12.85	5.05	31	1
	201304	411	74	375887	12.77	5.03	32	2
	201304	413	74	377788	12.8	5.13	32	2
	201304	303	74	316686	12.6	4.67	32	2
	201304	413	74	377624	13.03	4.77	32	1
	201304	383	74	358200	13.3	5.28	32	1
	201304	403	74	370138	13.26	5.07	32	1
	201304	403	74	370193	13.68	5.16	33	1
	201304	348	74	338809	13.2	5.32	33	1
	201304	303	74	316684	13.68	5.42	33	1
	201304	260	74	288025	13.93	5.45	33	2
	201304	343	74	336509	13.58	5.14	33	2
	201304	365	74	348477	14.04	5.18	33	2
	201304	413	74	377638	13.58	5.41	34	1
	201304	303	74	316645	13.62	5.04	34	1
	201304	384	74	358871	14.92	5.23	34	1
	201304	411	74	375929	13.9	5.17	34	2
	201304	383	74	358324	14.52	5.16	34	2
	201304	383	74	358446	13.36	5.21	34	2
	201304	413	74	377680	13.65	5.31	35	2
	201304	361	74	346293	13.45	5.21	35	2
	201304	303	74	316701	14.11	5.54	35	2
	201304	403	74	370134	14.37	5.46	35	1
	201304	365	74	348472	13.88	5.1	35	1
	201304	343	74	336586	14.62	5.49	35	1
	201304	411	74	375916	14.42	5.32	36	2
	201304	348	74	338778	14.99	5.92	36	2
	201304	303	74	316695	14.49	4.92	36	2
	201304	359	74	344980	15.14	5.37	36	1
	201304	343	74	336518	14.99	5.16	36	1
	201304	260	74	288022	15.12	5.55	37	2
	201304	411	74	375846	15.41	5.18	37	2
	201304	413	74	377786	14.36	5.24	37	2
	201304	313	74	321663	15.86	5.71	37	1
	201304	359	74	344985	16.14	5.5	37	1
	201304	411	74	375862	15.55	5.39	37	1
	201304	303	74	316710	15.1	5.67	38	1
	201304	362	74	346981	15.75	5.72	38	1
	201304	313	74	321646	15.6	5.64	38	1
	201304	403	74	370127	15.87	5.82	38	2
	201304	359	74	344988	16.13	5.58	38	2
	201304	362	74	347071	14.86	5.69	38	2
	201304	302	74	316084	16.57	5.84	39	2
	201304	413	74	377701	15.07	6.05	39	2
	201304	411	74	375844	16.29	5.79	39	2
	201304	313	74	321638	17.33	5.86	39	1
	201304	403	74	370165	17.17	6.17	39	1
	201304	348	74	338724	16.87	5.81	39	1
	201304	303	74	316651	16.19	5.66	40	1
	201304	365	74	348386	16.22	6.13	40	1
	201304	362	74	347025	16.08	5.54	40	1
	201304	303	74	316700	16.33	6.06	40	2
	201304	343	74	336590	15.18	5.59	40	2
	201304	260	74	288050	16.58	5.83	40	2
	201304	302	74	316046	17.23	6.06	41	1
	201304	348	74	338749	16.45	5.95	41	1
	201304	412	74	376546	16.04	5.89	41	1
	201304	411	74	375874	17.58	6.25	41	2
	201304	362	74	346997	16.83	5.99	41	2
	201304	303	74	316667	16.99	5.52	41	2
	201304	403	74	370126	17.41	6.38	42	2
	201304	343	74	336506	16.12	5.45	42	2
	201304	303	74	316656	16.06	5.8	42	2
	201304	343	74	336497	17.01	6.16	42	1
	201304	413	74	377608	16.49	5.57	42	1
	201304	403	74	370146	15.98	6.11	42	1
	201304	302	74	316047	16.78	6.17	43	2
	201304	412	74	376555	16.34	6.12	43	2
	201304	313	74	321653	16.25	5.98	43	2
	201304	368	74	349442	17.01	6.63	43	1
	201304	395	74	366012	16.72	6.39	43	1
	201304	258	74	287106	15.99	5.98	43	1
	201304	403	74	370125	18.98	6.78	44	1
	201304	303	74	316671	16.86	6.29	44	1
	201304	384	74	359362	16.96	6.49	44	1
	201304	343	74	336499	17.26	6.58	44	2
	201304	260	74	288035	16.5	5.85	44	2
	201304	260	74	288028	17.82	6.06	44	2
	201304	413	74	377611	16.8	5.94	45	2
	201304	365	74	348411	17.13	6.3	45	2
	201304	351	74	340356	17.05	5.92	45	2
	201304	313	74	321631	16.39	6.04	45	1
	201304	303	74	316649	17.48	6.28	45	1
	201304	403	74	370164	16.36	6.39	45	1
	201304	411	74	375875	16.85	6.52	46	2
	201304	348	74	338734	16.87	6.46	46	2
	201304	337	74	334789	16.83	6.31	46	1
	201304	313	74	321729	17.4	5.98	46	2
	201304	304	74	317183	17.07	6.25	47	1
	201304	369	74	350178	18.81	6.52	47	1
	201304	305	74	317870	17.36	6.41	47	1
	201304	413	74	377767	17.33	6.2	47	2
	201304	343	74	336556	16.43	5.75	47	2
	201304	303	74	316647	17.01	6.44	47	2
	201304	411	74	375839	18.02	6.31	48	2
	201304	303	74	316676	16.87	6.38	48	2
	201304	403	74	370170	18.48	7.01	48	2
	201304	413	74	377727	18.07	6.7	48	1
	201304	302	74	316060	17.73	6.46	48	1
	201304	258	74	287086	17.99	5.99	48	1
	201304	412	74	376532	17.79	6.44	49	2
	201304	411	74	375878	18.94	6.35	49	2
	201304	362	74	346962	18.16	6.55	49	2
	201304	348	74	338691	17.9	6.48	49	1
	201304	346	74	337758	19.45	7.4	49	1
	201304	343	74	336620	19.68	6.58	49	1
	201304	302	74	316165	17.51	6.47	50	2
	201304	348	74	338697	17.99	6.76	50	2
	201304	302	74	316043	16.45	6.5	50	2
	201304	313	74	321622	17.61	6.62	50	2
	201304	369	74	350117	17.93	6.93	50	1
	201304	304	74	339351	17.94	6.01	50	1
	201304	305	74	317179	17.41	6.28	50	1
	201304	413	74	377645	17.8	6.56	51	1
	201304	302	74	316058	16.86	6.21	51	2
	201304	258	74	287113	18.28	6.83	51	2
	201304	313	74	321637	18.02	6.92	52	2
	201304	303	74	316719	18.02	6.84	52	2
	201304	303	74	316673	17.01	6.64	52	2
	201304	346	74	337845	20.02	7.31	52	1
	201304	305	74	317865	17.58	6.44	52	1
	201304	343	74	336615	20.3	6.57	52	1
	201304	369	74	350155	18.05	6.49	53	2
	201304	347	74	338436	19.04	6.99	53	2
	201304	346	74	337840	20.98	7.51	53	1
	201304	344	74	337021	18.67	6.72	53	1
	201304	412	74	376535	19.73	7.07	54	2
	201304	343	74	336855	18.47	6.57	54	1
	201304	413	74	377736	21.28	7.08	55	1
	201304	302	74	316255	21.08	7.08	55	1
	201304	354	74	342448	18.42	7.2	55	2
	201304	313	74	321633	17.94	6.5	55	2
	201304	348	74	338694	19.78	7.49	55	2
	201304	349	74	339449	20.38	7.21	55	1
	201304	346	74	337833	21.25	7.23	55	1
	201304	347	74	338477	19.87	6.8	56	2
	201304	357	74	344362	18.82	6.66	56	2
	201304	347	74	338324	21.03	7.88	57	2
	201304	260	74	288032	19.66	7.19	57	2
	201304	302	74	316254	19.56	7.14	58	1
	201304	354	74	342475	23.51	8.12	58	2
	201304	357	74	344340	20.36	6.49	58	2
	201304	260	74	288034	21.6	6.97	58	1
	201304	302	74	316244	21	7.01	59	2
	201304	305	74	317855	20.22	7.41	59	1
	201304	302	74	316257	21.54	7.57	60	1
	201304	357	74	344335	19.3	7.34	60	2
	201304	302	74	316251	22.36	7.56	61	1
	201304	260	74	288031	21.19	7.74	61	2
	201304	349	74	339345	21.84	7.44	62	2
	201304	346	74	337828	20.61	7.69	62	2
	201304	260	74	288020	23.1	7.82	63	2
	201304	260	74	288030	19.01	7.21	63	2
	201304	302	74	316250	21.39	7.75	64	2
	201304	302	74	316239	22.95	8.43	70	2
	201402	312	74	127043	8.13	3.26	15	2
	201402	276	74	106077	8.33	3.34	15	2
	201402	316	74	129402	8.47	3.27	16	1
	201402	292	74	114791	8.46	3.37	16	2
	201402	256	74	98138	9.2	3.55	17	1
	201402	316	74	129398	9.1	3.36	17	1
	201402	276	74	106149	9.24	3.65	17	2
	201402	312	74	127021	8.64	3.38	17	2
	201402	256	74	98140	9.17	3.38	18	1
	201402	312	74	127033	9.01	3.61	18	1
	201402	257	74	98629	9.26	3.67	18	2
	201402	292	74	114825	8.65	3.58	18	2
	201402	276	74	106006	9.65	3.76	19	2
	201402	292	74	114819	9.45	3.79	19	2
	201402	312	74	127009	9.52	3.61	19	1
	201402	316	74	129399	9.11	3.71	19	1
	201402	256	74	98117	10.05	3.59	20	2
	201402	292	74	114823	10.32	3.79	20	2
	201402	276	74	106039	10.15	3.64	20	1
	201402	312	74	127008	9.71	3.95	20	1
	201402	276	74	106043	10.02	3.62	21	2
	201402	312	74	127013	10.14	3.95	21	2
	201402	272	74	103855	10.39	4.05	21	1
	201402	357	74	153644	10.35	3.94	21	1
	201402	256	74	98135	10.78	4.17	22	1
	201402	305	74	123089	10.6	4.14	22	1
	201402	276	74	106013	10.27	3.97	22	2
	201402	312	74	126998	10.16	4.12	22	2
	201402	256	74	98113	10.94	4.28	23	1
	201402	292	74	114814	11	4.12	23	1
	201402	276	74	106111	11.2	4.38	23	2
	201402	312	74	127001	10.35	4.12	23	2
	201402	276	74	106023	12.15	4.65	24	2
	201402	257	74	98633	11.19	4.22	24	2
	201402	305	74	123094	11.27	4.21	24	1
	201402	316	74	129323	11.52	4.53	24	1
	201402	318	74	129991	11.9	4.31	25	1
	201402	257	74	98608	11.27	4.42	25	1
	201402	343	74	147301	11.25	4.21	25	1
	201402	293	74	115513	11.63	4.63	25	2
	201402	277	74	106732	11.71	4.64	25	2
	201402	305	74	123068	11.79	4.7	25	2
	201402	261	74	99878	11.6	4.4	26	1
	201402	257	74	98619	11.76	4.56	26	1
	201402	310	74	125910	11.77	4.47	26	1
	201402	270	74	103225	11.38	4.13	26	2
	201402	269	74	102922	11.77	4.42	27	1
	201402	316	74	129395	11.72	4.53	27	2
	201402	269	74	102855	11.87	4.7	28	2
	201402	258	74	99181	13.18	4.67	28	2
	201402	309	74	125175	12.86	4.7	28	2
	201402	284	74	110551	14	4.87	28	1
	201402	350	74	150577	11.64	4.57	28	1
	201402	319	74	130885	12.46	4.74	28	1
	201402	268	74	102163	13.24	5.06	29	2
	201402	350	74	150802	13.57	4.99	29	2
	201402	310	74	125857	12.96	5	29	2
	201402	309	74	125151	12.62	4.65	29	1
	201402	272	74	104262	13.33	4.61	29	1
	201402	316	74	129366	12.69	4.59	29	1
	201402	318	74	129928	13.67	5.35	30	2
	201402	258	74	99154	13.08	4.78	30	1
	201402	270	74	103200	12.99	4.98	30	1
	201402	268	74	102169	13.9	5.15	30	1
	201402	257	74	98612	13.99	5.24	31	1
	201402	272	74	104268	13.59	4.9	31	1
	201402	268	74	102158	13.78	5.3	31	1
	201402	318	74	129914	13.56	4.98	31	2
	201402	349	74	150018	13.46	5.02	31	2
	201402	269	74	102902	13.66	5.08	31	2
	201402	274	74	104711	13.82	5.09	32	1
	201402	270	74	103265	14.89	5.01	32	1
	201402	268	74	102148	13.91	5.11	32	1
	201402	269	74	102898	14.7	5.48	32	2
	201402	319	74	131259	14.15	5.1	32	2
	201402	258	74	99124	13.78	5.1	32	2
	201402	257	74	98712	13.85	5.23	33	1
	201402	269	74	102895	13.8	5.08	33	1
	201402	318	74	129910	13.58	5.66	33	1
	201402	270	74	103271	14.45	5.24	33	2
	201402	268	74	102134	14.68	5.08	33	2
	201402	350	74	150508	13.92	5.52	33	2
	201402	350	74	150492	14.24	5.5	34	1
	201402	347	74	149020	13.32	5.16	34	1
	201402	315	74	128465	13.42	5.47	34	1
	201402	318	74	129876	14.17	5.45	34	2
	201402	268	74	102120	15.97	5.6	34	2
	201402	284	74	110555	14.21	4.92	34	2
	201402	261	74	99883	14.86	5.36	35	2
	201402	347	74	149027	14.97	5.93	35	2
	201402	349	74	149993	15.72	5.61	35	2
	201402	257	74	98638	14.92	5.4	35	1
	201402	268	74	102130	14.75	5.38	35	1
	201402	269	74	102799	14.83	5.2	35	1
	201402	298	74	118736	14.73	5.59	36	2
	201402	343	74	146980	15.09	5.48	36	2
	201402	318	74	129874	14.29	5.84	36	2
	201402	262	74	100448	16.16	5.95	36	1
	201402	258	74	99152	14.96	5.29	36	1
	201402	347	74	149113	14.38	5.53	36	1
	201402	261	74	99880	15.86	5.66	37	1
	201402	258	74	99318	15.96	5.65	37	1
	201402	347	74	149084	15.89	5.52	37	1
	201402	257	74	98724	15.55	5.64	37	2
	201402	270	74	103266	16.42	5.58	37	2
	201402	268	74	102176	15.31	5.66	37	2
	201402	257	74	98726	15.81	5.67	38	2
	201402	315	74	128457	16.25	5.42	38	2
	201402	268	74	102133	16.03	5.71	38	2
	201402	350	74	150527	16.43	5.88	38	1
	201402	285	74	110962	14.85	5.97	38	1
	201402	283	74	109923	15.86	5.78	38	1
	201402	261	74	99919	16.12	5.74	39	1
	201402	257	74	98722	15.31	5.67	39	1
	201402	347	74	149010	16.23	6.02	39	1
	201402	262	74	100444	15.05	5.74	39	2
	201402	349	74	150035	15.81	5.63	39	2
	201402	268	74	102152	16.42	5.94	39	2
	201402	257	74	98607	16.62	6.09	40	1
	201402	258	74	99102	16.14	6.07	40	1
	201402	347	74	149115	16.31	5.94	40	1
	201402	349	74	150001	16.66	5.87	40	2
	201402	268	74	102126	15.82	6.09	40	2
	201402	346	74	148590	15.46	5.9	40	2
	201402	261	74	99875	17.61	6.09	41	2
	201402	350	74	150538	16.36	6.16	41	2
	201402	262	74	100298	16.79	5.73	41	2
	201402	257	74	98614	18.43	6.18	41	1
	201402	347	74	149097	15.77	5.99	41	1
	201402	268	74	102251	15.92	5.66	41	1
	201402	267	74	102010	15.51	5.94	42	2
	201402	258	74	99011	16.51	6.06	42	2
	201402	350	74	150519	15.8	5.98	42	1
	201402	315	74	128461	16.21	6.09	42	1
	201402	268	74	102118	17.23	5.93	42	1
	201402	257	74	98651	16.31	5.7	43	2
	201402	350	74	150491	16.83	5.78	43	2
	201402	269	74	102780	16.61	5.85	43	2
	201402	262	74	100391	16.78	6.13	43	1
	201402	347	74	149069	17.62	6.15	43	1
	201402	343	74	146985	16.27	6.46	43	1
	201402	257	74	98710	15.57	5.69	44	2
	201402	318	74	129854	17.86	6.56	44	2
	201402	268	74	102253	15.94	5.74	44	2
	201402	347	74	149014	17.75	6.3	44	1
	201402	258	74	99097	18.13	6.09	44	1
	201402	349	74	149985	16.58	6.3	45	1
	201402	268	74	102180	17.31	6.22	45	1
	201402	300	74	119979	17.63	6.16	45	1
	201402	350	74	150614	17.09	6.66	45	2
	201402	318	74	129841	17.93	6.22	45	2
	201402	347	74	149021	17.57	6.8	45	2
	201402	257	74	98623	17.92	5.91	46	2
	201402	350	74	150507	14.92	5.95	46	2
	201402	258	74	99108	16.73	6.19	46	2
	201402	294	74	115807	17.6	5.84	46	1
	201402	269	74	102835	17.7	6.1	46	1
	201402	265	74	100706	17.91	6.73	47	1
	201402	294	74	115797	18.75	6.1	47	1
	201402	268	74	102137	18.39	5.93	47	1
	201402	350	74	150499	17.08	6.12	47	2
	201402	262	74	100265	18.06	5.98	47	2
	201402	258	74	99089	17.38	6.24	47	2
	201402	262	74	100263	18.45	6.6	48	2
	201402	349	74	149997	17.64	6.28	48	2
	201402	258	74	99068	17.48	6.3	48	2
	201402	347	74	149081	17.53	6.47	48	1
	201402	285	74	110955	17.69	6.16	48	1
	201402	350	74	150496	17.93	6.56	48	1
	201402	257	74	98773	18.64	6.58	49	2
	201402	350	74	150526	17.84	6.62	49	2
	201402	315	74	128438	17.61	6.86	49	2
	201402	318	74	129833	18.14	6.28	49	1
	201402	285	74	110943	18.35	6.71	49	1
	201402	266	74	101402	18.25	6.96	49	1
	201402	183	74	66311	19.82	7	50	2
	201402	318	74	129825	17.63	6.38	50	2
	201402	350	74	150579	18.22	7.15	50	1
	201402	262	74	100269	17.88	6.58	50	1
	201402	347	74	149024	20.24	6.9	50	1
	201402	257	74	98751	20.18	6.88	51	2
	201402	350	74	150546	19.23	6.79	51	2
	201402	318	74	129844	19.39	7.38	51	2
	201402	262	74	100523	18.28	7.17	51	1
	201402	257	74	98813	20.79	7.51	52	1
	201402	350	74	150597	19.18	7.3	52	1
	201402	318	74	129860	18.99	6.97	52	1
	201402	297	74	117882	19.06	6.65	52	2
	201402	258	74	99104	17.77	6.48	52	2
	201402	294	74	115856	21.25	7.3	52	2
	201402	297	74	117875	19.09	7.07	53	2
	201402	318	74	129943	18.48	7.04	53	2
	201402	297	74	117930	19	7.15	54	2
	201402	318	74	129827	18.09	7.38	54	2
	201402	347	74	149098	18.31	6.95	54	2
	201402	343	74	146996	20.33	7.62	54	1
	201402	349	74	150088	17.85	6.64	54	1
	201402	267	74	102002	19.06	7.34	54	1
	201402	347	74	149011	18.62	7.46	55	2
	201402	285	74	110947	18.09	6.55	55	2
	201402	266	74	101362	20.12	7.32	55	1
	201402	318	74	129890	19.98	7.05	56	2
	201402	294	74	115792	19.82	7.25	57	2
	201402	343	74	146991	20.46	7.66	57	1
	201402	280	74	108409	20.35	7.39	59	1
	201402	349	74	150102	21.6	7.52	59	2
	201402	252	74	97009	19.83	7.25	60	2
	201402	351	74	151397	20.86	7.35	61	1
	201402	318	74	129886	21.31	7.89	62	1
	201402	350	74	150580	21.41	7.29	63	1
	201404	394	74	178419	7.97	3.12	16	2
	201404	394	74	178474	7.9	3.3	16	2
	201404	419	74	192271	7.81	3.08	16	1
	201404	407	74	186658	8.52	3.01	16	1
	201404	351	74	152681	8.32	3.17	17	1
	201404	381	74	170245	8.28	3.12	17	1
	201404	393	74	177786	8.89	3.24	17	2
	201404	392	74	176936	8.39	3.15	18	1
	201404	394	74	178483	8.95	3.38	18	1
	201404	397	74	180702	8.79	3.44	18	2
	201404	380	74	169570	8.69	3.28	18	2
	201404	436	74	205292	10.08	3.97	19	1
	201404	395	74	179566	9.9	3.69	19	2
	201404	394	74	178458	9.62	4.02	20	2
	201404	435	74	204229	9.91	3.69	20	1
	201404	396	74	180248	10.98	4.23	21	2
	201404	397	74	180506	10.56	3.94	21	2
	201404	436	74	204978	10.39	4.09	21	1
	201404	392	74	177104	10.69	3.92	21	1
	201404	436	74	205013	10.9	4.25	22	1
	201404	392	74	177083	11.26	4.31	22	1
	201404	394	74	178407	11.05	4.03	22	2
	201404	393	74	177779	11.1	3.92	22	2
	201404	396	74	180147	11.15	4.32	23	2
	201404	351	74	152417	11.17	4.12	23	2
	201404	395	74	179165	11.28	4.32	23	1
	201404	435	74	204099	11.42	4.47	23	1
	201404	278	74	113633	11.91	4.69	24	1
	201404	394	74	178408	11.03	4.24	24	1
	201404	380	74	169512	11.21	4.32	24	1
	201404	351	74	152402	11.11	4.07	24	2
	201404	392	74	177029	11.68	4.23	24	2
	201404	381	74	170161	11.32	4.58	24	2
	201404	387	74	174194	11.98	4.3	25	2
	201404	396	74	180085	11.35	4.31	25	2
	201404	390	74	176150	11.96	4.47	25	2
	201404	369	74	162875	11.12	4.17	25	1
	201404	419	74	192305	10.66	4.11	25	1
	201404	398	74	181378	12	4.48	25	1
	201404	452	74	218847	12.28	4.4	26	2
	201404	351	74	152413	12.14	4.35	26	2
	201404	457	74	223353	12.06	4.38	26	2
	201404	438	74	207168	11.93	4.24	26	1
	201404	440	74	209496	12.15	4.43	26	1
	201404	391	74	176588	11.97	4.32	26	1
	201404	438	74	207184	11.84	4.45	27	2
	201404	393	74	177789	13	4.91	27	2
	201404	278	74	113665	11.69	4.59	27	2
	201404	441	74	210274	12.43	4.78	27	1
	201404	446	74	213285	13.12	4.92	27	1
	201404	421	74	194253	11.79	4.72	27	1
	201404	438	74	207181	12.01	4.54	28	2
	201404	351	74	152408	12.09	4.54	28	2
	201404	367	74	161960	12.72	4.87	28	2
	201404	393	74	177806	12.75	4.76	28	1
	201404	278	74	113626	12.24	4.42	28	1
	201404	405	74	185227	12.67	4.91	28	1
	201404	403	74	184267	13.28	4.99	29	1
	201404	391	74	176734	12.64	4.53	29	1
	201404	446	74	213245	13.45	5.01	29	1
	201404	351	74	152404	12.53	4.77	29	2
	201404	278	74	113639	12.88	4.69	29	2
	201404	393	74	177773	13.38	5.05	29	2
	201404	421	74	194240	13.5	4.53	30	1
	201404	438	74	207231	12.82	4.9	30	1
	201404	391	74	176782	12.71	4.69	30	1
	201404	351	74	152425	12.2	4.57	30	2
	201404	393	74	177816	13.5	5.08	30	2
	201404	367	74	162015	12.83	5.07	30	2
	201404	438	74	207172	13.93	4.57	31	1
	201404	393	74	177808	12.27	4.67	31	1
	201404	414	74	189484	13.8	4.94	31	1
	201404	278	74	113657	13.37	5.31	31	2
	201404	420	74	192666	13.17	5.04	31	2
	201404	457	74	223179	13.11	4.97	31	2
	201404	405	74	185192	14.07	5.11	32	1
	201404	446	74	213239	13.87	5.01	32	1
	201404	278	74	113627	13.42	5.01	32	1
	201404	351	74	152412	13.21	5.24	32	2
	201404	393	74	177780	13.97	5.55	32	2
	201404	380	74	169401	13.85	5.16	32	2
	201404	403	74	184263	13.78	5.18	33	1
	201404	393	74	177796	14.21	5.21	33	1
	201404	278	74	113654	14.06	5.05	33	1
	201404	349	74	151231	13.76	5.02	33	2
	201404	457	74	223203	14.48	5.18	33	2
	201404	404	74	184870	13.67	5.59	33	2
	201404	349	74	151334	13.48	5.11	34	1
	201404	380	74	169520	13.39	5.01	34	1
	201404	369	74	162998	13.58	5.09	34	1
	201404	351	74	152619	13.67	5.18	34	2
	201404	393	74	177838	14.72	5.18	34	2
	201404	436	74	205038	14.98	5.63	34	2
	201404	404	74	184735	14.61	5.76	35	1
	201404	405	74	185378	14.55	5.38	35	1
	201404	403	74	184319	13.47	5.09	35	1
	201404	387	74	174221	14.94	5.11	35	2
	201404	457	74	223189	14.09	4.99	35	2
	201404	436	74	205053	15.25	5.49	35	2
	201404	381	74	170076	15.21	5.22	36	2
	201404	457	74	223243	14.35	5.52	36	2
	201404	392	74	177199	14.79	5.37	36	2
	201404	380	74	169498	15.37	5.37	36	1
	201404	393	74	177828	15.38	5.7	36	1
	201404	391	74	176701	14.31	5.33	36	1
	201404	351	74	152443	15.04	5.61	37	1
	201404	349	74	151401	14.12	5.46	37	1
	201404	407	74	186514	15.59	5.5	37	1
	201404	393	74	177886	15.95	5.69	37	2
	201404	404	74	184889	14.65	5.69	37	2
	201404	278	74	113637	16.12	5.78	37	2
	201404	404	74	184824	16.24	5.61	38	2
	201404	278	74	113709	16.04	5.54	38	2
	201404	457	74	223340	14.69	5.62	38	2
	201404	380	74	169491	16.51	6.04	38	1
	201404	393	74	177858	15.59	5.3	38	1
	201404	436	74	205204	14.76	5.7	38	1
	201404	278	74	113692	17.45	5.98	39	2
	201404	351	74	152395	16.03	5.76	39	2
	201404	407	74	186577	16.65	5.83	39	2
	201404	393	74	177807	16.16	5.56	39	1
	201404	436	74	205236	15.25	5.66	39	1
	201404	391	74	176664	17.1	6.37	39	1
	201404	406	74	185707	15.76	5.51	40	1
	201404	407	74	186472	16.45	5.68	40	1
	201404	404	74	184714	15.62	5.93	40	1
	201404	278	74	113640	16.56	5.52	40	2
	201404	408	74	186764	15.56	5.81	40	2
	201404	369	74	162932	14.8	5.86	40	2
	201404	349	74	151346	17.16	5.73	41	1
	201404	278	74	113653	16.32	5.61	41	1
	201404	367	74	161965	16.09	5.97	41	1
	201404	369	74	162920	15.58	6.13	41	2
	201404	393	74	177925	16.45	5.97	41	2
	201404	436	74	205180	15.33	5.93	41	2
	201404	404	74	184849	17.15	6.19	42	2
	201404	391	74	176580	17.8	5.94	42	2
	201404	278	74	113634	16.31	5.57	42	2
	201404	350	74	151772	16.45	5.69	42	1
	201404	380	74	169517	16.37	6.19	42	1
	201404	407	74	186511	16.79	5.73	42	1
	201404	367	74	162065	17.05	6.06	43	1
	201404	278	74	113625	17.33	6.6	43	1
	201404	436	74	205150	16.7	6.13	43	1
	201404	380	74	169458	17.09	5.73	43	2
	201404	407	74	186491	16.99	5.97	43	2
	201404	404	74	184813	16.94	6.5	43	2
	201404	278	74	113664	16.9	6.3	44	2
	201404	351	74	152390	16.9	6.08	44	2
	201404	407	74	186479	16.97	5.73	44	2
	201404	380	74	169490	16.98	6.58	44	1
	201404	404	74	184784	17.94	6.34	44	1
	201404	405	74	185259	18.23	6.09	44	1
	201404	436	74	205126	16.55	6.48	45	1
	201404	403	74	184262	18.82	6.53	45	1
	201404	407	74	186501	16.34	6.29	45	1
	201404	351	74	152393	18.27	6.17	45	2
	201404	278	74	113630	16.58	5.99	45	2
	201404	367	74	161995	16.57	6.26	45	2
	201404	380	74	169378	17.38	5.99	45	2
	201404	404	74	184774	17.73	6.39	46	2
	201404	380	74	169373	18.59	6.68	46	2
	201404	278	74	113635	16.84	6.08	46	2
	201404	350	74	151735	17.96	6.06	46	1
	201404	407	74	186524	18.73	6.35	46	1
	201404	349	74	151345	17.74	6.23	46	1
	201404	404	74	184792	18.21	6.5	47	1
	201404	431	74	200415	18.19	6.37	47	1
	201404	369	74	162905	16.08	5.92	47	1
	201404	278	74	113660	17.84	6.39	47	2
	201404	349	74	151244	17.64	6.22	47	2
	201404	380	74	169511	17.39	6.41	47	2
	201404	381	74	170090	18.4	6.33	48	1
	201404	349	74	151395	17.2	5.77	48	1
	201404	350	74	151757	18.34	6.63	48	1
	201404	278	74	113685	17.42	6.34	48	2
	201404	436	74	205132	18.34	6.6	48	2
	201404	369	74	162885	16.33	6.11	48	2
	201404	278	74	113645	17.86	6.24	49	2
	201404	407	74	186454	17.68	6.13	49	2
	201404	367	74	161970	19.39	7.14	49	2
	201404	408	74	186934	16.82	6.53	49	1
	201404	420	74	192719	18.52	6.34	49	1
	201404	446	74	213266	18.26	6.45	50	2
	201404	278	74	113670	18.27	6.17	50	2
	201404	350	74	151748	18.44	6.42	50	2
	201404	404	74	184835	18.2	7.22	50	1
	201404	419	74	192100	18.34	6.62	50	1
	201404	405	74	185201	19.19	7.11	50	1
	201404	404	74	184797	19.9	7.2	51	2
	201404	349	74	151344	17.63	6.61	51	2
	201404	369	74	163021	18.37	6.46	51	2
	201404	350	74	151888	18.77	7.19	51	1
	201404	380	74	169341	18.24	6.94	51	1
	201404	276	74	113031	20.33	7.12	52	1
	201404	419	74	192238	17.99	6.87	52	1
	201404	369	74	162935	18.07	6.46	52	2
	201404	349	74	151373	17.46	6.98	52	2
	201404	350	74	151896	17.66	6.37	52	2
	201404	404	74	184841	19.02	7.31	53	2
	201404	350	74	151870	19.36	6.85	53	2
	201404	405	74	185226	19.63	7	53	2
	201404	374	74	165651	20.47	6.61	53	1
	201404	395	74	179358	19.83	7.65	53	1
	201404	419	74	192247	16.91	6.91	53	1
	201404	414	74	189357	20.54	6.99	54	1
	201404	380	74	169505	19.79	7.23	54	1
	201404	419	74	192075	18.75	6.87	54	2
	201404	405	74	185205	19.62	7.57	54	2
	201404	381	74	170066	20.42	6.71	55	2
	201404	419	74	192067	19.74	7.15	55	2
	201404	380	74	169502	20.38	7.44	55	1
	201404	405	74	185228	17.77	6.93	55	1
	201404	414	74	189424	21.14	7.6	55	1
	201404	431	74	200418	20.26	7.32	56	1
	201404	415	74	190060	19.57	7.06	56	2
	201404	419	74	192093	18.73	7.02	56	2
	201404	375	74	166404	19.52	7.8	57	2
	201404	403	74	184279	19.25	7.32	57	2
	201404	414	74	189387	19.86	7.25	58	2
	201404	414	74	189423	18.75	6.96	59	2
	201404	419	74	192085	18.99	7.58	59	2
	201404	420	74	192722	21.38	8.02	59	2
	201404	349	74	151207	19.4	6.76	60	1
	201404	369	74	162923	22.56	7.46	61	2
	201404	405	74	185293	21.16	7.69	61	2
	201404	419	74	192071	20.68	7.58	61	2
	201404	374	74	165642	21.01	7.73	62	2
	201404	419	74	192078	19.7	7.98	64	2
	24141	19	74	257945	22.05	7.99	60	0
	24141	19	74	257946	20.52	8.26	66.3	2
	24141	19	74	257948		8.3	63.4	2
	24141	20	74	257936	20.27	6.98	61.8	1
	24141	28	74	257650	22.6	7.28	61.5	2
	24141	4	74	257949	19.6	6.94	60.1	2
	24141	4	74	257950	20.73	7.51	63.7	2
	24141	6	74	257943	20.57	8.49	60.3	2
	24142	21	74	257841	23.05	7.65	62.5	2
	24142	22	74	257734	20.09	7.2	60.9	2
	24142	27	74	257755	19.08	6.92	60.3	0
	24142	3	74	257637	22.48	8.98	68.7	2
	24142	3	74	257638	21.89	8.1	59.8	1
	24142	4	74	257678	22.86	8.36	65.5	2
	24142	4	74	257680	21	8.25	64.4	2
	24142	5	74	257916	20.23	7.94	61.9	2
	24142	5	74	257921		7.6	64	2
	24142	6	74	257677	22.59	8.55	62.9	2
	24142	6	74	257684	19.84	7.9	63	2
	24143	5	74	257775	20.49	7.02	61.1	0
	24151	18	74	264197	20.37	7.75	59.8	2
	24151	19	74	264190	20.53	7.17	60.3	1
	24151	4	74	257140	21.77	7.51	60.3	1
	24151	4	74	257141	17.51	7.51	61.2	2
	24152	11	74	258666	19.37	8.15	64.3	2
	24152	15	74	258680	22.18	8.31	61.8	1
	24152	16	74	258695	20.81	7.23	60.7	2
	24152	17	74	258700	20.69	7.95	61.7	2
	24152	2	74	257647	22.35	8.68	61.9	2
	24152	2	74	257882	20.78	7.36	66	2
	24152	23	74	258808	20.72	7.29	59.6	2
	24152	3	74	257605	20.84	7.47	60.7	2
	24152	3	74	257645	19.4	7.54	62.3	1
	25141	2	74	257276	20.15	7.25	63.4	2
	25141	2	74	257278		7.71	63.4	2
	25141	2	74	257279	19.75	7.57	62	2
	25141	3	74	257280	22.47	7.92	61.7	1

## Sheet: Red Hake
	References:
1	McElroy et al. 2019 -		https://doi.org/10.25923/2sgn-mx62
2	Resource Survey Report Bottom Trawl Survey Gulf of Maine ; 5 March – 9 May 2013 ; NOAA FSV Henry B Bigelow (FSV 225)
3	Resource Survey Report Bottom Trawl Survey Gulf of Maine ; 6 September – 19 November 2013 ; NOAA FSV Henry B Bigelow (FSV 225)
4	Resource Survey Report Bottom Trawl Survey Gulf of Maine ; 31 March – 31 May 2014 ; NOAA FSV Henry B. Bigelow (FSV 225)
5	Resource Survey Report Bottom Trawl Survey Gulf of Maine ; 9 September – 14 November 2014 ; NOAA FSV Henry B. Bigelow (FSV 225)
CRUISE	STATION	SVSPP	INDID	OL	OW	LENGTH	SEX		Seal Red Hake Prey Length (cm)	Seal Red Hake OL (mm)
201304	257	77	286327	9.97	2.95	24	2		25.5	11.26
201304	311	77	321376	9.81	3.06	24	2		25.5	11.55
201304	305	77	317866	9.33	2.93	24	1		20.5	10
201304	309	77	320354	10.16	3.06	24	1		20.5	9.87
201304	245	77	280602	9.83	3.08	25	2		13.8	8.1
201304	258	77	287205	10.05	3.05	25	2		13.8	8.2
201304	304	77	317388	10.24	2.92	25	2		23	11.32
201304	260	77	288082	10.3	2.93	25	1		23	11.14
201304	356	77	343658	9.97	3.02	25	1		24.4	11.51
201304	358	77	344862	9.84	2.82	25	1		24.4	11.31
201304	358	77	344883	10.24	3.19	26	1		26	11.74
201304	355	77	343066	10.74	3.02	26	1		26	11.85
201304	375	77	353944	10.57	3.37	26	1		25.5	11.88
201304	355	77	343064	10.47	3.2	26	2		25.5	12.08
201304	357	77	344457	10.31	3.12	26	2		22.5	7.83
201304	375	77	353933	10.64	3.14	26	2		22.5	8.07
201304	257	77	286358	11.03	3.53	27	1		27.5	10.41
201304	354	77	342480	10.49	3.33	27	1		27.5	10.29
201304	394	77	365158	11.18	3.19	27	1		29	11.5
201304	374	77	353435	11	3.06	27	2		29	11.44
201304	381	77	357328	11.89	3.4	27	2		21.1	10.39
201304	401	77	368663	11.66	3.5	27	2		21.1	10.34
201304	397	77	367306	11.63	3.4	28	1		21.6	10.9
201304	304	77	317360	10.66	3.16	28	1		21.6	10.67
201304	309	77	320374	12.32	3.43	28	1		30	13.18
201304	366	77	349105	10.55	3.33	28	2		30	12.91
201304	378	77	355665	11.38	3.16	28	2		22	9.27
201304	390	77	362791	11.04	3.32	28	2		22	9.33
201304	366	77	349139	11.55	3.68	29	2		25.5	12.26
201304	395	77	365716	11.47	3.35	29	2		25.5	12.2
201304	258	77	287192	11.36	3.36	29	1		32	13.62
201304	311	77	321352	11.75	3.62	29	1		32	13.73
201304	394	77	365165	12.09	3.58	29	1		31.5	13.6
201304	257	77	286185	11.19	3.5	30	1		31.5	13.46
201304	354	77	342477	12.05	3.6	30	1		21	8.44
201304	397	77	367098	12.18	3.62	30	1		21	8.65
201304	358	77	344801	12.4	3.64	30	2		30	12.03
201304	374	77	353517	12.2	3.53	30	2		30	11.67
201304	375	77	353929	12.34	3.61	30	2		27.6	12.75
201304	305	77	317860	11.29	3.76	31	1		27.6	12.79
201304	309	77	320347	13.21	3.7	31	1		33.3	11.54
201304	353	77	341945	11.23	3.47	31	1		33.3	11.8
201304	361	77	346350	11.63	3.69	31	2		24.7	10.59
201304	368	77	349545	12.37	3.46	31	2		24.7	10.54
201304	392	77	364082	11.51	3.83	31	2		22	10.13
201304	260	77	288042	13.35	3.76	32	1		25	10.16
201304	304	77	317368	12.5	3.84	32	1		25	10.05
201304	354	77	342476	13.69	4.07	32	1		30.5	11.95
201304	311	77	321306	12.75	3.86	32	2		30.5	11.92
201304	356	77	343663	12.44	3.61	32	2
201304	401	77	368637	12.65	3.42	32	2
201304	309	77	320350	13.41	3.76	33	1
201304	368	77	349541	13.22	3.8	33	1
201304	392	77	364073	13.07	3.81	33	1
201304	374	77	353477	12.91	3.77	33	2
201304	381	77	357286	12.66	3.75	33	2
201304	394	77	365190	12.86	3.68	33	2
201304	397	77	367095	13.99	4.11	34	2
201304	260	77	288041	13.24	3.61	34	2
201304	305	77	317864	13.69	3.81	34	2
201304	355	77	343077	12.04	3.66	34	1
201304	391	77	362981	13.38	4.15	34	1
201304	258	77	287200	13.32	4.1	34	1
201304	257	77	286309	13.28	3.92	35	2
201304	260	77	288047	13.53	4.07	35	2
201304	311	77	321314	12.94	3.91	35	2
201304	304	77	317343	14.78	4.03	35	1
201304	393	77	364599	14.44	4.14	35	1
201304	403	77	370567	14.93	4.31	35	1
201304	257	77	286289	15.08	4.38	36	1
201304	355	77	343079	13.85	4.06	36	1
201304	368	77	349559	13.59	4.05	36	1
201304	388	77	361875	13.49	3.84	36	2
201304	398	77	367818	14.28	3.77	36	2
201304	309	77	320356	13.96	4.22	36	2
201304	245	77	280527	14.56	3.92	37	2
201304	354	77	342473	14.68	4.2	37	2
201304	394	77	365198	14.77	4.05	37	2
201304	305	77	317853	14.28	4.12	37	1
201304	311	77	321347	15.02	4.14	37	1
201304	305	77	317834	15.56	4.27	38	2
201304	357	77	344427	14.71	4.12	38	2
201304	394	77	365229	15.13	4.16	38	2
201304	353	77	341934	13.81	3.92	38	1
201304	362	77	347222	15.23	4.17	38	1
201304	385	77	360162	14.77	4.23	38	1
201304	257	77	286243	14.84	4.03	39	2
201304	260	77	288055	16.62	4.57	39	2
201304	304	77	317357	15.51	4.47	39	2
201304	315	77	322700	14.87	4.19	39	1
201304	402	77	369997	15.04	4.36	39	1
201304	355	77	343076	15.97	4.5	40	1
201304	398	77	367805	15.24	3.98	40	2
201304	257	77	286431	18.08	4.65	41	2
201304	257	77	286464	15.92	4.47	41	2
201304	257	77	286499	17.54	4.57	41	2
201304	355	77	343070	15.54	4.25	41	1
201304	257	77	286201	17.16	4.45	42	2
201304	257	77	286214	16.2	4.52	42	2
201304	257	77	286220	15.98	4.95	42	2
201304	397	77	367091	15.66	4.71	42	2
201304	257	77	286297	17.14	4.97	43	2
201304	257	77	286399	15.9	4.56	43	2
201304	393	77	364560	16.2	4.38	43	2
201304	397	77	367104	16.99	4.81	43	2
201304	353	77	341922	17.18	4.73	44	2
201304	397	77	367089	18.08	4.81	44	2
201304	397	77	367112	17.32	4.67	44	2
201304	397	77	367168	16.38	4.8	44	2
201304	304	77	317512	18.08	4.96	45	2
201304	309	77	320378	17.44	4.66	45	2
201304	317	77	323687	17.71	4.67	45	2
201304	317	77	323721	16.67	5.16	45	2
201304	317	77	323701	17.71	4.95	46	2
201304	390	77	362783	16.71	4.98	46	2
201304	397	77	367087	17.93	4.89	46	2
201304	257	77	286340	17.18	4.58	47	2
201304	402	77	370123	17.75	4.58	47	2
201402	348	77	149616	6.75	2.11	14	2
201402	292	77	114936	6.21	2.13	14	2
201402	295	77	116632	6.83	2.09	14	2
201402	265	77	100826	6.6	2.14	14	1
201402	288	77	112367	6.47	2.07	14	1
201402	276	77	106019	6.56	2.1	14	1
201402	351	77	151562	6.57	2.11	15	2
201402	346	77	148812	6.98	2.24	15	2
201402	301	77	120482	7.03	2.07	15	2
201402	314	77	127925	6.62	2.11	15	1
201402	283	77	110201	6.45	2.06	15	1
201402	300	77	120080	6.79	2.23	15	1
201402	297	77	118031	7.91	2.42	16	2
201402	319	77	130984	7.29	2.3	16	1
201402	301	77	120267	7.74	2.38	17	2
201402	314	77	127903	7.69	2.41	17	2
201402	291	77	114125	7.09	2.37	17	2
201402	313	77	127420	7.47	2.38	17	1
201402	315	77	128578	7.28	2.27	17	1
201402	276	77	106001	7.56	2.41	17	1
201402	299	77	119398	7.77	2.64	18	2
201402	277	77	106954	8.33	2.68	18	2
201402	295	77	116570	7.61	2.33	18	2
201402	256	77	98141	7.82	2.5	18	1
201402	286	77	111698	8.08	2.7	18	1
201402	293	77	115404	7.54	2.38	18	1
201402	312	77	127037	8.26	2.48	19	2
201402	265	77	100791	8.35	2.68	19	2
201402	266	77	101202	8.19	2.46	19	2
201402	348	77	149632	8.53	2.75	19	1
201402	302	77	121073	8.06	2.39	19	1
201402	287	77	112119	8.28	2.69	19	1
201402	292	77	114944	8.59	2.59	20	2
201402	306	77	123459	8.23	2.66	20	2
201402	283	77	110161	8.47	2.56	20	2
201402	300	77	120055	8.5	2.55	20	1
201402	346	77	148887	9.1	2.96	20	1
201402	288	77	112348	8.48	2.72	20	1
201402	276	77	106004	9.7	2.74	21	2
201402	256	77	98336	9.46	2.89	21	2
201402	291	77	114098	8.62	2.72	21	1
201402	297	77	118025	8.6	2.57	21	1
201402	292	77	114874	9.01	2.85	22	1
201402	293	77	115402	8.78	2.73	22	1
201402	265	77	100830	9.03	2.52	22	1
201402	309	77	125172	9.98	3.19	22	2
201402	311	77	126347	8.84	2.7	22	2
201402	351	77	151608	10.1	3.02	23	2
201402	346	77	148783	9.73	2.96	23	1
201402	296	77	117154	9.13	2.9	24	1
201402	344	77	147750	10.16	3.23	24	1
201402	348	77	149610	10.75	3.4	24	2
201402	343	77	147376	10.01	3.21	24	2
201402	313	77	127247	10.64	3.23	25	2
201402	305	77	122617	11.14	3.64	25	2
201402	277	77	106950	11.31	3.67	25	2
201402	306	77	123416	11.08	3.12	25	1
201402	283	77	110117	10.94	3.68	25	1
201402	317	77	129555	10.73	3.43	25	1
201402	346	77	148758	10.69	3.39	26	1
201402	302	77	120890	10.43	3.45	26	1
201402	314	77	127744	10.48	3.3	26	2
201402	300	77	119920	10.72	3.36	27	1
201402	351	77	151559	10.65	3.32	27	1
201402	301	77	120262	10.81	3.48	27	1
201402	299	77	119381	11.02	3.3	27	2
201402	317	77	129522	11.08	3.46	27	2
201402	278	77	107524	11.09	3.25	27	2
201402	348	77	149572	11.61	3.21	28	1
201402	295	77	116561	11.73	3.47	28	1
201402	283	77	110050	12.06	3.51	28	1
201402	276	77	106029	11.61	3.29	28	2
201402	291	77	114138	11.27	3.58	28	2
201402	306	77	123417	11.28	3.55	28	2
201402	319	77	130902	11.21	3.36	29	1
201402	292	77	114833	11.99	3.5	29	1
201402	289	77	112924	11.74	3.6	29	1
201402	291	77	114092	11.75	3.54	29	2
201402	313	77	127407	11.33	3.38	29	2
201402	311	77	126362	12.27	3.55	29	2
201402	317	77	129507	12.94	3.49	30	1
201402	265	77	100747	11.85	3.45	30	1
201402	283	77	110086	11.95	3.84	30	1
201402	346	77	148727	13.05	3.55	30	2
201402	302	77	120894	11.99	3.53	30	2
201402	307	77	123852	11.3	3.54	30	2
201402	306	77	123415	12.65	3.79	31	1
201402	348	77	149611	12.69	3.6	31	1
201402	301	77	120258	13.32	3.8	31	1
201402	357	77	153502	12.35	3.59	31	2
201402	266	77	101185	13.06	3.87	31	2
201402	286	77	111542	11.18	3.65	31	2
201402	317	77	129550	12.84	3.59	32	1
201402	265	77	100788	13.44	3.74	32	1
201402	286	77	111562	13.11	3.77	32	1
201402	313	77	127427	12.47	3.76	32	2
201402	319	77	130898	12.66	3.81	32	2
201402	283	77	110072	13.55	3.91	32	2
201402	300	77	119877	12.45	3.84	33	1
201402	306	77	123428	13.4	3.66	33	1
201402	357	77	153504	13.2	3.83	33	1
201402	256	77	98121	13.02	3.92	33	2
201402	284	77	110595	12.54	3.85	33	2
201402	301	77	120269	12.76	3.8	33	2
201402	299	77	119316	13.76	3.79	34	2
201402	292	77	114826	13.32	4.1	34	2
201402	293	77	115359	13.89	4.04	34	2
201402	346	77	148722	13.06	4.01	34	1
201402	348	77	149430	13.03	4.07	34	1
201402	295	77	116548	13.24	3.91	34	1
201402	348	77	149435	13.64	3.75	35	2
201402	301	77	120264	15.11	3.79	35	2
201402	306	77	123446	13.73	3.75	35	2
201402	346	77	148794	13.81	4	35	1
201402	357	77	153506	14.71	4.3	35	1
201402	287	77	111922	14.35	4.01	35	1
201402	292	77	114839	13.66	3.47	36	1
201402	294	77	116084	14.41	3.92	36	1
201402	266	77	101171	13.5	4.03	36	1
201402	295	77	116531	13.75	3.91	36	2
201402	265	77	100756	14.68	3.94	36	2
201402	283	77	110173	13.64	4.12	36	2
201402	314	77	127687	14.93	4.07	37	2
201402	317	77	129500	14.98	4.28	37	2
201402	253	77	97539	14.36	4.12	37	1
201402	258	77	99239	13.83	4.11	37	1
201402	288	77	112180	14.77	4.16	37	1
201402	346	77	148718	14.92	4.26	38	2
201402	317	77	129505	14.35	4.11	38	2
201402	283	77	110145	14.8	4.15	38	2
201402	295	77	116526	14.5	4.39	38	1
201402	284	77	110598	15.21	4.16	38	1
201402	285	77	111064	15.23	4.11	38	1
201402	301	77	120280	15.28	4.65	39	2
201402	314	77	127733	14.76	3.96	39	2
201402	266	77	101178	14.88	4.46	39	2
201402	287	77	111921	15.12	4.33	39	1
201402	348	77	149418	15.75	4.43	40	2
201402	294	77	116094	15.91	4.12	40	1
201402	306	77	123426	15.9	4.5	40	2
201402	348	77	149471	15.95	4.69	41	2
201402	348	77	149620	15.64	4.69	41	2
201402	303	77	121749	16.69	4.59	41	1
201402	317	77	129535	15.57	4.24	41	2
201402	289	77	113033	15.05	4.66	41	1
201402	348	77	149449	16.54	4.95	42	2
201402	348	77	149567	17.22	4.87	42	2
201402	283	77	110203	16.06	4.27	42	2
201402	348	77	149590	17.15	4.43	43	2
201402	348	77	149603	17.56	4.72	43	2
201402	317	77	129567	14.92	4.39	43	2
201402	348	77	149438	17.94	4.94	44	2
201402	256	77	98115	16.66	4.06	44	2
201402	287	77	111912	16.8	4.66	44	2
201402	297	77	118010	16.65	4.75	45	2
201402	288	77	112191	16.28	4.68	45	1
201402	296	77	117135	18.37	4.96	46	2
201402	303	77	121775	17.22	4.93	46	2
201402	287	77	111917	17.28	5.27	46	2
201402	299	77	119327	15.87	4.86	47	2
201402	300	77	119910	17.38	4.72	47	2
201402	303	77	121823	17.37	4.93	47	2
201402	298	77	118894	18.91	4.86	48	2
201402	301	77	120257	19.03	5.71	49	2
201402	293	77	115282	18.98	5.27	50	2
201404	393	77	178274	7.09	2.21	13	1
201404	430	77	200170	6.88	2.4	14	1
201404	436	77	205355	7.11	2.2	14	0
201404	366	77	161782	8.51	2.95	19	2
201404	372	77	164747	8.04	2.41	19	1
201404	385	77	173394	8.15	2.53	19	1
201404	418	77	191787	8.44	2.53	19	1
201404	428	77	198793	7.95	2.39	19	2
201404	430	77	199796	8.36	2.5	19	2
201404	375	77	166706	8.46	2.53	20	1
201404	386	77	174130	9.13	2.53	20	1
201404	396	77	179921	8.03	2.46	20	1
201404	397	77	180911	9.01	2.97	20	2
201404	399	77	182120	9.06	2.73	20	2
201404	420	77	192842	8.64	2.7	20	2
201404	368	77	162614	8.94	2.69	21	2
201404	396	77	179896	8.61	2.78	21	1
201404	428	77	198819	8.77	2.76	21	1
201404	430	77	199799	8.86	2.96	21	1
201404	438	77	207591	9.07	2.98	21	2
201404	371	77	164028	9.15	2.84	22	1
201404	382	77	170879	9.58	2.94	22	2
201404	380	77	169580	9.53	3.01	23	2
201404	381	77	170395	9.06	2.96	23	2
201404	420	77	192803	9.22	2.78	23	1
201404	425	77	196516	9.91	3.04	23	1
201404	374	77	165868	9.81	2.93	24	2
201404	385	77	173290	10.16	2.81	24	1
201404	397	77	180810	10.65	2.94	24	1
201404	399	77	182091	10.04	2.82	24	1
201404	414	77	189728	10.35	3.21	24	2
201404	417	77	191197	9.96	3.13	24	1
201404	367	77	162206	10.57	3.2	25	2
201404	373	77	165229	10.14	2.88	25	1
201404	375	77	166657	10.04	2.84	25	1
201404	379	77	168965	10.14	3.1	25	2
201404	384	77	172341	10.54	3.09	25	1
201404	389	77	175351	10.05	3.3	25	2
201404	368	77	162624	10.13	3.09	26	1
201404	372	77	164656	9.36	2.8	26	2
201404	379	77	168975	10.69	3.41	26	1
201404	380	77	169531	10.66	3.02	26	1
201404	395	77	179391	10.79	3.21	26	2
201404	396	77	179898	10.26	2.91	26	2
201404	366	77	161714	10.63	2.8	27	1
201404	375	77	166572	11.02	3.12	27	2
201404	384	77	172332	10.52	3.29	27	2
201404	386	77	174014	10.67	3.2	27	2
201404	397	77	180805	11.02	3.23	27	1
201404	428	77	198774	11.25	3.62	27	1
201404	367	77	162185	12.63	3.74	28	1
201404	387	77	174429	11.25	3.26	28	2
201404	392	77	177431	12.29	3.64	28	2
201404	394	77	178906	11.9	3.58	28	1
201404	420	77	192811	12.12	3.76	28	1
201404	421	77	193509	11.18	3.53	28	2
201404	371	77	164086	11.82	3.39	29	1
201404	379	77	168984	10.09	3.37	29	2
201404	398	77	181269	10.46	3.08	29	1
201404	414	77	189750	11.46	3.37	29	2
201404	425	77	196528	11.58	3.46	29	2
201404	429	77	199533	11.5	3.68	29	2
201404	368	77	162609	12.11	3.51	30	1
201404	385	77	173282	12.6	3.82	30	2
201404	386	77	174003	12.86	3.32	30	2
201404	392	77	177388	12.55	3.51	30	2
201404	399	77	182104	12.8	3.69	30	1
201404	420	77	192834	11.8	3.51	30	1
201404	372	77	164779	13.21	3.61	31	2
201404	375	77	166580	12.19	3.53	31	1
201404	384	77	172331	11.88	3.49	31	1
201404	397	77	180815	12.5	3.54	31	1
201404	416	77	190715	12.48	3.53	31	2
201404	430	77	199812	12.59	3.62	31	1
201404	433	77	202457	11.96	3.55	31	2
201404	368	77	162608	13.41	3.69	32	1
201404	417	77	191218	12.08	3.72	32	1
201404	421	77	193494	12.6	3.71	32	2
201404	422	77	194272	12.25	3.79	32	2
201404	427	77	197926	12.27	3.71	32	2
201404	433	77	202503	12.45	3.76	32	1
201404	374	77	165871	13	3.67	33	1
201404	375	77	166575	12.61	3.6	33	1
201404	386	77	173997	12.83	3.87	33	2
201404	394	77	178918	12.58	3.84	33	2
201404	396	77	179890	12.92	3.44	33	2
201404	428	77	198785	12.66	3.46	33	1
201404	371	77	164011	14.09	3.78	34	1
201404	372	77	164729	12.88	3.5	34	1
201404	373	77	165237	13.57	3.65	34	2
201404	379	77	169030	12.84	3.84	34	1
201404	397	77	180828	12.23	3.66	34	2
201404	420	77	192805	13.66	3.88	34	2
201404	369	77	163060	14.05	3.9	35	2
201404	379	77	169035	12.81	4.02	35	1
201404	384	77	172373	13.19	3.85	35	1
201404	401	77	182861	13.8	3.92	35	2
201404	402	77	183589	13.2	3.88	35	2
201404	417	77	191230	13.08	4.1	35	1
201404	368	77	162599	14.18	3.99	36	2
201404	380	77	169526	13.71	4.06	36	1
201404	394	77	178872	15.06	4.08	36	1
201404	396	77	179887	13.51	4.06	36	2
201404	397	77	180803	14.06	3.92	36	2
201404	420	77	192896	13.66	3.61	36	1
201404	375	77	166582	13.46	4.07	37	1
201404	386	77	174073	14.85	4.5	37	2
201404	399	77	182070	14.63	3.65	37	2
201404	409	77	187476	14.26	3.97	37	1
201404	429	77	199420	14.53	4.27	37	2
201404	438	77	207608	14.87	4.13	37	1
201404	397	77	180919	15.69	4.42	38	2
201404	398	77	181322	14.45	4.09	38	1
201404	401	77	182955	14.96	4.36	38	1
201404	428	77	198880	15.41	3.97	38	2
201404	438	77	207602	14.58	4.5	38	2
201404	371	77	164141	15.34	4.46	39	2
201404	380	77	169548	15.66	4.28	39	1
201404	382	77	170967	15.81	4.17	39	2
201404	402	77	183571	15.54	4.37	39	1
201404	403	77	184416	15.78	4.36	39	2
201404	406	77	185747	14.78	4.3	39	1
201404	417	77	191174	15.02	4.33	39	2
201404	379	77	168959	14.87	4.17	40	2
201404	394	77	178859	15.43	4.19	40	2
201404	414	77	189666	15.11	4.18	40	2
201404	367	77	162221	16.26	4.7	41	1
201404	372	77	164761	15.76	4.45	41	1
201404	374	77	166059	16.26	4.24	41	2
201404	430	77	199853	15.15	4.3	41	2
201404	438	77	207552	16.2	4.33	41	2
201404	366	77	161723	16.82	4.86	42	2
201404	375	77	166695	17.01	4.38	42	2
201404	428	77	198710	15.34	4.18	42	2
201404	371	77	164167	16.7	4.18	43	2
201404	380	77	169595	18.16	4.52	43	2
201404	414	77	189798	16.56	4.51	43	2
201404	414	77	189894	15.77	4.84	43	1
201404	379	77	169072	17.7	4.61	44	2
201404	379	77	169078	17.64	4.64	44	2
201404	428	77	198851	17.24	4.92	44	2
201404	371	77	164008	17.36	5.12	45	2
201404	372	77	164629	16.46	4.6	45	2
201404	414	77	189713	17.63	4.4	45	2
201404	428	77	198796	16.19	5.2	45	2
201404	372	77	164772	16.75	5.02	46	2
201404	398	77	181339	17.97	4.89	46	2
201404	416	77	190722	18	4.76	46	2
201404	409	77	187477	18.93	4.83	48	2
201404	414	77	189634	18.25	5.39	48	2
201404	419	77	192307	17.28	4.65	48	2
201404	373	77	165455	19.17	5.2	49	2
201404	381	77	170413	19.09	5.13	50	2
201302	224	77	98958	6.6	1.98	15	2
201302	372	77	165053	6.82	2.21	15	2
201302	314	77	136268	7.13	2.17	15	1
201302	317	77	138156	6.91	2.34	15	1
201302	381	77	170167	7.08	2.36	16	2
201302	327	77	142786	8.07	2.35	16	2
201302	371	77	164643	7.22	2.39	16	1
201302	221	77	97219	6.79	2.34	16	1
201302	221	77	97182	7.54	2.48	17	1
201302	367	77	163137	7.64	2.35	17	1
201302	226	77	99277	8.17	2.51	17	2
201302	317	77	138176	7.58	2.44	17	2
201302	328	77	143138	7.58	2.77	18	2
201302	356	77	156617	8.1	2.46	18	2
201302	372	77	165089	7.95	2.43	18	1
201302	224	77	98858	8.18	2.55	19	1
201302	347	77	153283	8.42	2.62	19	1
201302	363	77	161088	8.01	2.31	19	2
201302	209	77	93306	8.82	2.6	20	1
201302	220	77	97047	7.91	2.49	20	1
201302	332	77	144778	9.18	2.8	20	2
201302	351	77	154455	9.54	2.66	21	2
201302	370	77	164246	8.95	2.9	21	2
201302	352	77	155071	8.68	2.76	21	1
201302	362	77	160704	8.52	2.62	21	1
201302	347	77	153289	9.45	2.89	22	2
201302	366	77	162630	9.39	2.9	22	2
201302	367	77	163174	9.07	2.78	22	1
201302	380	77	169663	9.61	2.86	22	1
201302	221	77	97211	9.41	2.92	23	2
201302	391	77	175897	9.68	3.02	23	2
201302	356	77	156648	9.37	2.89	23	1
201302	362	77	160694	8.61	3	23	1
201302	226	77	99270	9.22	3.01	24	1
201302	352	77	155028	10.38	3.13	24	1
201302	385	77	172524	10.37	3.44	24	2
201302	220	77	97037	10.58	3.24	25	2
201302	372	77	165162	10.06	3.16	25	2
201302	384	77	171664	10.22	3.19	25	2
201302	224	77	98736	10.43	3.12	25	1
201302	378	77	168614	9.96	3.12	25	1
201302	381	77	170112	10.63	3.23	25	1
201302	350	77	154054	11.03	3.21	26	1
201302	371	77	164664	11.05	3.09	26	1
201302	224	77	98757	11.51	3.02	27	1
201302	367	77	163133	11.67	3.43	27	1
201302	371	77	164637	11.01	3.44	27	1
201302	311	77	135196	11.21	3.33	27	2
201302	359	77	159130	10.94	3.34	27	2
201302	379	77	169279	11.21	3.23	27	2
201302	209	77	93303	11.17	3.39	28	1
201302	321	77	139144	11.46	3.22	28	1
201302	363	77	161044	10.88	3.12	28	1
201302	221	77	97193	11.52	3.52	28	2
201302	381	77	170099	11.21	3.49	28	2
201302	382	77	170594	10.96	3.42	28	2
201302	380	77	169655	12.54	3.66	29	2
201302	351	77	154464	10.41	3.41	29	2
201302	357	77	157127	11.27	3.48	29	2
201302	349	77	153606	10.82	3.55	29	1
201302	362	77	160674	11.56	3.55	29	1
201302	372	77	165041	11.76	3.45	29	1
201302	224	77	98732	12.5	3.49	30	2
201302	371	77	164634	11.29	3.47	30	2
201302	381	77	170106	11.89	3.4	30	2
201302	347	77	153336	11.45	3.39	30	1
201302	375	77	166771	12.12	3.57	30	1
201302	384	77	171660	12.18	3.34	30	1
201302	220	77	96941	11.96	3.45	31	2
201302	367	77	163109	12.12	3.96	31	2
201302	391	77	175850	12.82	3.91	31	2
201302	352	77	154976	12.2	3.45	31	1
201302	362	77	160578	12.07	3.48	31	1
201302	372	77	165046	12.73	3.73	31	1
201302	220	77	96969	13.53	3.64	32	1
201302	221	77	97172	12.66	3.62	32	1
201302	221	77	97199	12.5	3.62	32	1
201302	321	77	139131		3.71	32	2
201302	363	77	161043	13.04	3.58	32	2
201302	367	77	163127	13.53	3.75	32	2
201302	368	77	163291	13.01	3.92	33	2
201302	379	77	169274	14.08	3.77	33	2
201302	350	77	154030	14.02	3.78	33	1
201302	372	77	165036	12.68	3.73	33	1
201302	378	77	168659	13.09	3.81	33	1
201302	347	77	153313	12.89	3.83	34	2
201302	371	77	164631	13.4	3.89	34	2
201302	391	77	175933	13.81	4.01	34	2
201302	356	77	156666	13.38	3.96	34	1
201302	374	77	166230	13.44	3.99	34	1
201302	224	77	98741	13.14	4.09	34	1
201302	362	77	160510	13.27	3.55	35	1
201302	366	77	162606	13.33	3.91	35	1
201302	366	77	162746	14.12	3.79	35	1
201302	367	77	163108	12.43	4.02	35	2
201302	370	77	164216	13.08	4.05	35	2
201302	378	77	168744	14.19	4.2	35	2
201302	349	77	153655	13.78	3.98	36	1
201302	222	77	97769	13.76	3.86	36	2
201302	365	77	162281	13.23	3.92	36	2
201302	371	77	164672	14.47	4.17	36	2
201302	351	77	154486	14.62	4.04	37	2
201302	362	77	160513	15.24	4.02	37	2
201302	384	77	171658	13.69	4.34	37	2
201302	376	77	167379	13.47	4.16	37	1
201302	221	77	97171	15.15	4.09	38	2
201302	307	77	133340	15.85	4.19	38	1
201302	363	77	161055	15.12	4.05	38	2
201302	367	77	163097	14.26	4.01	38	2
201302	350	77	154028	15.24	3.98	39	2
201302	352	77	155069	16.26	4.75	39	2
201302	362	77	160527	15.65	4.59	39	2
201302	351	77	154426	15.11	4.37	39	1
201302	365	77	162211	15.79	4.35	39	1
201302	368	77	163296	14.07	4.37	39	1
201302	366	77	162698	15.75	4.15	40	2
201302	375	77	166711	16.02	4.49	40	2
201302	378	77	169005	15.84	4.36	40	2
201302	402	77	182190	15.61	4.17	40	2
201302	357	77	157172	16.57	4.48	41	2
201302	362	77	160558	16.39	4.17	41	2
201302	367	77	163117	16.65	4.66	41	2
201302	372	77	165033	16.48	4.54	41	2
201302	362	77	160505	15.62	4.22	42	2
201302	363	77	161051	15.65	4.32	42	2
201302	364	77	161949	15.72	4.44	42	1
201302	360	77	159679	16.12	4.51	43	2
201302	361	77	160182	16.37	4.38	43	2
201302	367	77	163113	16.7	4.5	43	2
201302	307	77	133325	17.22	4.54	44	2
201302	375	77	166678	17.75	4.44	44	2
201302	352	77	154996	17.3	4.91	45	2
201302	352	77	155034	17.15	5.05	45	2
201302	365	77	162251	16.77	5.07	45	2
201302	367	77	163101	15.1	4.81	45	2
201302	362	77	160611	17.73	4.63	46	2
201302	367	77	163105	17.7	4.89	46	2
201304	380	77	356862	8.11	2.57	18	2
201304	401	77	368757	8.32	2.66	18	2
201304	412	77	376780	8.08	2.62	18	2
201304	258	77	287246	8.06	2.52	19	2
201304	390	77	362840	8.24	2.67	19	2
201304	304	77	317454	8.71	2.54	19	1
201304	310	77	320775	9.14	2.6	19	1
201304	358	77	344891	8.89	2.73	20	1
201304	373	77	352651	9.48	2.96	20	1
201304	379	77	356236	8.77	2.71	20	2
201304	394	77	365279	8.45	2.47	20	2
201304	397	77	367260	8.54	2.51	21	1
201304	257	77	286302	8.54	2.64	21	1
201304	309	77	320411	9.31	2.68	21	2
201304	311	77	321360	9.12	2.86	21	2
201304	353	77	341941	9.19	2.74	22	2
201304	394	77	365310	9.12	2.66	22	2
201304	397	77	367281	8.66	2.56	22	2
201304	354	77	342481	9.73	2.98	23	2
201304	371	77	351356	9.75	2.99	23	1
201304	373	77	352662	9.82	2.96	23	1
25151	11	77	259255	19.07	5.21	50	2
25151	12	77	259253	19.75	5.24	50.8	2
25151	13	77	259163	17.78	4.77	45.2	2
25151	18	77	259164	17.2	5.38	47.3	2
25151	19	77	259166	17.81	5.07	45.9	2
25151	19	77	259167		4.84	53.1	2
25151	21	77	259194	18.73	5.21	46.1	2
25151	23	77	259206	17.43	5.38	47.9	2
25151	24	77	259208	19.22	5.09	47.8	2
25151	24	77	259209	18.2	4.83	46.5	2
25151	3	77	259266	18.07	5.09	46.8	0
25151	7	77	259161		5.02	46.2	2
25151	8	77	259258	17.25	4.85	45	2
25152	18	77	264004	17.94	5.66	47.7	2
25152	18	77	264005	18.29	5.07	48.2	2
25152	18	77	264043	18.72	5.23	48.1	2
25152	18	77	264044	18.91	5.32	49.5	2
25152	18	77	264045	17.7	4.59	47.4	2
25152	18	77	264046	18.72	5.05	48.2	2
25152	19	77	258702	17.08	5.34	45.8	2
25152	2	77	263974	21.1	5.93	57.9	2
25152	2	77	263975	18.83	4.82	46.7	2
25152	20	77	258731	17.84	5.21	47.3	2
25152	21	77	264020	18.25	4.57	45.8	2
25152	22	77	258763	17.45	4.69	45.8	2
25152	22	77	258764	17.03	4.82	45	2
25152	22	77	258765	18.34	5.06	45.1	2
25152	22	77	258766	18.71	5.07	49.2	2
25152	22	77	258767	18.51	5.09	45.6	2
25152	3	77	264065		5.11	50.1	2
25152	3	77	264066		5.03	49.1	2
25152	8	77	263984	17.86	5.21	47.5	2
25152	8	77	263985		5.15	47.4	2
25152	8	77	263986	19.71	5.72	49.8	2
24151	1	77	257142	18.68	5.21	47.2	2
24151	1	77	257143	16.46	4.81	46.9	2
24151	1	77	257144	17.42	4.85	45	2
24151	16	77	257146	17.39	4.77	48.3	2
24151	16	77	257154	17.98	4.9	48.2	2
24151	16	77	257155	18.02	4.82	46.3	2
24151	16	77	257156	19.09	4.72	47	2
24151	16	77	257157	18.82	4.76	46.8	2
24151	16	77	257158	18.63	5.3	47.9	2
24151	17	77	257161	19.56	5.37	50.2	0
24151	18	77	264183	18.02	5.3	48	2
24151	18	77	264191	18.63	5.08	48.9	2
24151	18	77	264192	18.36	4.56	46.2	2
24151	18	77	264193	18.4	4.89	46.6	2
24151	18	77	264194	18.22	5.35	46.3	2
24151	18	77	264195	18.57	4.94	46	2
24151	19	77	264137	17.57	4.94	46.1	2
24151	20	77	264147		4.82	46.3	2
24151	20	77	264148	18.17	4.83	47.1	2
24151	20	77	264149	16.93	4.96	46.3	2
24151	21	77	264145	18.08	5.14	50	2
24152	12	77	258669		5.09	47.9	2
24152	13	77	258670	16.76	4.56	45.5	2
24152	14	77	258675	17.7	5.26	46.1	2
24152	14	77	258676	17.48	4.92	45.3	2
24152	16	77	258692	17.62	4.95	45	2
24152	16	77	258693	16.57	4.67	45.7	2
24152	16	77	258694	18.13	5.25	47.8	2
24152	17	77	263958		5.07	45.6	0
24152	17	77	263959	19.11	5.05	47.9	2
24152	17	77	263960	18.11	5.47	47.1	2
24152	17	77	263961	17.28	5	45.1	2
24152	17	77	263962	16.76	4.54	47.3	2
24152	18	77	258823	16.31	4.68	46.1	2
24152	18	77	258824	20.69	5.24	51.5	2
24152	18	77	258825	18.02	4.92	48.3	2
24152	18	77	258826	18.14	4.98	44.7	2
24152	20	77	258801	17.09	4.57	45.2	2
24152	3	77	257628	18.65	4.93	45.6	2
24152	3	77	257629	17.48	4.7	46.5	2
24152	3	77	257630	16.91	4.77	45.4	2
24152	3	77	257631	17.06	4.41	45.2	2
24152	4	77	263910	18.61	4.86	45.1	2
24152	4	77	263913	17.8	4.99	47	2
24152	4	77	263920	16.84	4.77	45.1	2
24152	4	77	263921	17.69	5.14	45.7	2
24152	8	77	258645	18.22	4.76	45.6	2
24152	8	77	258651	17.53	5.11	47.3	2
24152	9	77	258663	18.15	4.77	46.9	0
24152	9	77	258664	18.33	5.16	47.3	2
24152	9	77	258665	20.49	5.24	48.6	2

## Sheet: White Hake
	References:
1	McElroy et al. 2019 -		https://doi.org/10.25923/2sgn-mx62
2	Resource Survey Report Bottom Trawl Survey Gulf of Maine ; 9 September – 14 November 2014 ; NOAA FSV Henry B. Bigelow (FSV 225)
3	Resource Survey Report Bottom Trawl Survey Gulf of Maine ; 1 September – 5 November 2015 ; NOAA FSV Henry B. Bigelow (FSV 225)
4	Resource Survey Report Bottom Trawl Survey Gulf of Maine ; 8 April – 7 June 2016 ; NOAA Ship Henry B. Bigelow (FSV 225)
5	Resource Survey Report Bottom Trawl Survey Gulf of Maine ; 8 September – 10 November 2016 ; NOAA Ship Henry B. Bigelow (FSV 225)
6	Cruise Results NOAA FRV Gloria Michell Gulf of Maine ; GM14-04, Parts I-IV
7	Cruise Results NOAA FRV Gloria Michelle Gulf of Maine ; GM 15-03, Parts I-IV
CRUISE	YEAR	SEASON	STATION	SVSPP	INDID	OL	OW	LENGTH	SEX	REGION		Seal White Hake Prey Length (cm)	Seal White Hake OL (mm)
201504	2015	FALL	232	76	106057		2.53	16	1	WEST		20.5	13.9
201504	2015	FALL	242	76	110728		4.84	48	2	WEST		20.5	13.66
201504	2015	FALL	242	76	110731		5.54	56	2	WEST		25	15.13
201504	2015	FALL	242	76	110743		4.24	42	1	WEST		25	15.31
201504	2015	FALL	242	76	110746		4.02	37	2	WEST		33.5	15.4
201504	2015	FALL	242	76	110750		4.43	40	2	WEST		33.5	15.6
201504	2015	FALL	242	76	110754		4.09	35	2	WEST		19.2	9.46
201504	2015	FALL	292	76	131149		4.42	45	2	WEST		19.2	9.55
201504	2015	FALL	293	76	131798		4.93	47	1	WEST		22.9	11.48
201504	2015	FALL	293	76	131816		5	51	1	WEST		22.9	11.61
201504	2015	FALL	293	76	131837		4.36	39	1	WEST		35.5	17.75
201504	2015	FALL	293	76	131851		4.67	41	1	WEST		35.5	17.65
201504	2015	FALL	293	76	131852		5.06	45	2	WEST		32.5	14.11
201504	2015	FALL	293	76	131855		4.81	42	1	WEST		32.5	14.18
201504	2015	FALL	302	76	138238		5.06	48	1	WEST		27	13.4
201504	2015	FALL	302	76	138245		4.76	48	1	WEST		27	13.31
201504	2015	FALL	304	76	139418		4.83	46	2	WEST		28.1	13.03
201504	2015	FALL	304	76	139445		4.97	50	1	WEST		28.1	13.34
201504	2015	FALL	304	76	139446		5.52	58	2	WEST		20.6	11.05
201504	2015	FALL	319	76	146437		5	47	1	EAST		20.6	11.11
201504	2015	FALL	320	76	146583		5.39	64	2	EAST		22.3	11.83
201504	2015	FALL	320	76	146588		4.66	43	1	EAST		22.3	12.14
201504	2015	FALL	320	76	146593		4.85	44	1	EAST		33
201504	2015	FALL	320	76	146594		5.05	47	1	EAST		23	8.81
201504	2015	FALL	320	76	146628		4.42	45	2	EAST		23	8.84
201504	2015	FALL	320	76	146632		4.81	48	1	EAST		36	16.2
201504	2015	FALL	320	76	146641		4.89	45	1	EAST		36	16.24
201504	2015	FALL	320	76	146642		4.65	46	1	EAST		24	10.49
201504	2015	FALL	320	76	146648		4.65	43	1	EAST		24	10.55
201504	2015	FALL	320	76	146656		5.51	54	1	EAST		25.3	10.57
201504	2015	FALL	320	76	146659		6.63	82	2	EAST		25.3	10.67
201504	2015	FALL	321	76	147392		4.55	45	2	EAST		19.5	9.39
201504	2015	FALL	321	76	147393		4.48	42	1	EAST		19.5	10.2
201504	2015	FALL	321	76	147395		4.64	40	2	EAST		25.8	11.36
201504	2015	FALL	321	76	147396		4.41	39	1	EAST		25.8	11.49
201504	2015	FALL	321	76	147397		2.82	20	1	EAST
201504	2015	FALL	322	76	147549		4.91	50	1	EAST
201504	2015	FALL	322	76	147551		3.82	34	1	EAST
201504	2015	FALL	322	76	147579		4.67	45	1	EAST
201504	2015	FALL	323	76	147821		4.92	47	1	EAST
201504	2015	FALL	323	76	147835		4.46	37	1	EAST
201504	2015	FALL	323	76	147839		5.33	57	1	EAST
201504	2015	FALL	323	76	147846		4.87	51	1	EAST
201504	2015	FALL	323	76	147852		5.13	50	1	EAST
201504	2015	FALL	323	76	147866		4.7	45	1	EAST
201504	2015	FALL	323	76	147872		4.65	40	1	EAST
201504	2015	FALL	323	76	147875		4.09	36	1	EAST
201504	2015	FALL	323	76	147879		4.8	44	2	EAST
201504	2015	FALL	324	76	148151		8.76	111	2	EAST
201504	2015	FALL	324	76	148157		6.1	65	2	EAST
201504	2015	FALL	324	76	148168		6.09	67	2	EAST
201504	2015	FALL	324	76	148194		5.46	63	2	EAST
201504	2015	FALL	324	76	148213		5.42	61	2	EAST
201504	2015	FALL	324	76	148238		5.45	61	1	EAST
201504	2015	FALL	324	76	148244		4.85	49	1	EAST
201504	2015	FALL	324	76	148246		5.01	50	1	EAST
201504	2015	FALL	324	76	148247		5.21	50	1	EAST
201504	2015	FALL	324	76	148249		5.04	46	1	EAST
201504	2015	FALL	324	76	148252		4.69	44	1	EAST
201504	2015	FALL	324	76	148258		5.31	65	2	EAST
201504	2015	FALL	324	76	148264		6.15	64	2	EAST
201504	2015	FALL	324	76	148266		5.45	61	1	EAST
201504	2015	FALL	324	76	148268		5.14	51	1	EAST
201504	2015	FALL	324	76	148271		5.27	52	1	EAST
201504	2015	FALL	324	76	148274		5.31	59	2	EAST
201504	2015	FALL	324	76	148276		4.89	48	2	EAST
201504	2015	FALL	324	76	148278		5.38	51	1	EAST
201504	2015	FALL	324	76	148281		4.78	47	1	EAST
201504	2015	FALL	324	76	148283		4.47	37	1	EAST
201504	2015	FALL	325	76	149120		3.85	39	2	EAST
201504	2015	FALL	325	76	149125		4.72	50	1	EAST
201504	2015	FALL	326	76	149431		4.84	51	2	EAST
201504	2015	FALL	326	76	149432		5.29	53	1	EAST
201504	2015	FALL	326	76	149434		5.06	48	1	EAST
201504	2015	FALL	327	76	149815		4.22	38	1	EAST
201504	2015	FALL	327	76	149989	10.96	3.45	25	1	EAST
201504	2015	FALL	328	76	150028		6.45	71	2	EAST
201504	2015	FALL	328	76	150039		6.02	56	2	EAST
201504	2015	FALL	328	76	150044		5.18	45	1	EAST
201504	2015	FALL	328	76	150047		4.8	48	2	EAST
201504	2015	FALL	328	76	150055		6.66	69	1	EAST
201504	2015	FALL	328	76	150057		5.61	61	2	EAST
201504	2015	FALL	328	76	150066		6.18	65	1	EAST
201504	2015	FALL	328	76	150076		6.11	70	2	EAST
201504	2015	FALL	328	76	150080		6.78	77	2	EAST
201504	2015	FALL	329	76	151408		5.22	61	2	EAST
201504	2015	FALL	329	76	151412		6.01	67	2	EAST
201504	2015	FALL	330	76	151812		5.79	66	2	EAST
201504	2015	FALL	330	76	151832		5.66	63	2	EAST
201504	2015	FALL	331	76	152150		4.55	38	2	EAST
201504	2015	FALL	333	76	152833		4.13	38	1	EAST
201504	2015	FALL	333	76	152835		4.03	37	1	EAST
201504	2015	FALL	333	76	152837		4.78	46	2	EAST
201504	2015	FALL	333	76	152840		4.37	41	1	EAST
201504	2015	FALL	333	76	152843		5.97	62	2	EAST
201504	2015	FALL	333	76	152846		4.16	38	1	EAST
201504	2015	FALL	333	76	152848		6.33	76	2	EAST
201504	2015	FALL	333	76	152850		3.97	32	1	EAST
201504	2015	FALL	333	76	152852		5.26	48	1	EAST
201504	2015	FALL	333	76	152859		4.35	40	1	EAST
201504	2015	FALL	333	76	152860		4.56	42	1	EAST
201504	2015	FALL	333	76	152862		4.41	41	1	EAST
201504	2015	FALL	333	76	152864		4.48	43	1	EAST
201504	2015	FALL	333	76	152865		5.32	53	1	EAST
201504	2015	FALL	333	76	152867		4.95	57	1	EAST
201504	2015	FALL	333	76	152869		5.11	47	1	EAST
201504	2015	FALL	333	76	152870		6.36	69	2	EAST
201504	2015	FALL	333	76	152875		6.7	75	2	EAST
201504	2015	FALL	333	76	152876		4.92	48	1	EAST
201504	2015	FALL	333	76	153184		4.46	39	1	EAST
201504	2015	FALL	333	76	153185		4.56	42	1	EAST
201504	2015	FALL	333	76	153188		5.55	46	1	EAST
201504	2015	FALL	333	76	153192		4.18	37	1	EAST
201504	2015	FALL	333	76	153193		4.04	39	1	EAST
201504	2015	FALL	333	76	153195		5.63	56	2	EAST
201504	2015	FALL	333	76	153203		5.79	56	2	EAST
201504	2015	FALL	333	76	153209		4.99	49	1	EAST
201504	2015	FALL	334	76	153686		5.3	60	2	EAST
201504	2015	FALL	334	76	153691		5.39	59	2	EAST
201504	2015	FALL	334	76	153695		4.46	38	2	EAST
201504	2015	FALL	334	76	153707		4.71	45	2	EAST
201504	2015	FALL	334	76	153708		5.91	66	2	EAST
201504	2015	FALL	334	76	153732		5.46	59	2	EAST
201504	2015	FALL	334	76	153765		2.67	17	1	EAST
201504	2015	FALL	335	76	154042		4.09	38	1	EAST
201504	2015	FALL	335	76	154064		4.02	38	1	EAST
201504	2015	FALL	335	76	154075		4.66	47	2	EAST
201504	2015	FALL	335	76	154079		4.85	46	2	EAST
201504	2015	FALL	335	76	154087		4.12	40	1	EAST
201504	2015	FALL	335	76	154099		4.45	49	1	EAST
201504	2015	FALL	336	76	154641		4.04	40	1	EAST
201504	2015	FALL	336	76	154673		4.83	46	2	EAST
201504	2015	FALL	336	76	154711		4.27	35	1	EAST
201504	2015	FALL	336	76	154722	8.87	2.66	17	1	EAST
201504	2015	FALL	336	76	154855		4.2	42	2	EAST
201504	2015	FALL	336	76	154861		4.61	46	2	EAST
201504	2015	FALL	336	76	154954		4.7	47	2	EAST
201504	2015	FALL	336	76	154964		4.31	40	1	EAST
201504	2015	FALL	336	76	154974		5.18	51	1	EAST
201504	2015	FALL	336	76	154982		4.21	44	2	EAST
201504	2015	FALL	336	76	154984		5.89	65	2	EAST
201504	2015	FALL	336	76	154988		4.35	38	1	EAST
201504	2015	FALL	336	76	154989		4.04	36	1	EAST
201504	2015	FALL	336	76	154990		4.28	37	1	EAST
201504	2015	FALL	336	76	154991		4.45	42	2	EAST
201504	2015	FALL	336	76	154992		5.34	59	2	EAST
201504	2015	FALL	337	76	155204		3.86	32	1	EAST
201504	2015	FALL	337	76	155216		4.54	41	1	EAST
201504	2015	FALL	337	76	155222		4.2	37	1	EAST
201504	2015	FALL	337	76	155225		4.72	38	1	EAST
201504	2015	FALL	337	76	155235		4.32	45	2	EAST
201504	2015	FALL	338	76	155779		4.93	53	1	EAST
201504	2015	FALL	338	76	155783		5.32	62	2	EAST
201504	2015	FALL	338	76	155786		4.26	40	1	EAST
201504	2015	FALL	338	76	155790		4.47	41	2	EAST
201504	2015	FALL	338	76	155792		4.24	42	2	EAST
201504	2015	FALL	338	76	155796		4.09	42	1	EAST
201504	2015	FALL	338	76	155800		4.52	45	2	EAST
201504	2015	FALL	339	76	156355		5.74	59	2	EAST
201504	2015	FALL	339	76	156357		6.07	63	2	EAST
201504	2015	FALL	339	76	156360		6.26	64	2	EAST
201504	2015	FALL	339	76	156412		4.68	50	2	EAST
201504	2015	FALL	339	76	156416		4.9	46	2	EAST
201504	2015	FALL	339	76	156419		5.12	45	2	EAST
201504	2015	FALL	340	76	156745		5.69	64	2	EAST
201504	2015	FALL	340	76	156751		4.84	53	1	EAST
201504	2015	FALL	340	76	156757		5.58	56	2	EAST
201504	2015	FALL	340	76	156761		4.95	52	2	EAST
201504	2015	FALL	340	76	156764		4.71	47	2	EAST
201504	2015	FALL	340	76	156767		4.39	39	1	EAST
201504	2015	FALL	340	76	156985		4.13	37	1	EAST
201504	2015	FALL	340	76	156991		4.08	40	1	EAST
201504	2015	FALL	340	76	156993		4.87	54	2	EAST
201504	2015	FALL	341	76	157596		5.99	62	1	EAST
201504	2015	FALL	341	76	157604		4.6	50	2	EAST
201504	2015	FALL	341	76	157610		5.93	65	2	EAST
201504	2015	FALL	342	76	157908		5.55	61	2	EAST
201504	2015	FALL	342	76	157912		4.95	45	2	EAST
201504	2015	FALL	342	76	157918		4.16	39	1	EAST
201504	2015	FALL	343	76	158567		7.68	111	2	EAST
201504	2015	FALL	343	76	158708		4.95	47	1	EAST
201504	2015	FALL	343	76	158717		5.06	46	1	EAST
201504	2015	FALL	343	76	158720		6.06	71	2	EAST
201504	2015	FALL	343	76	158739		5.79	66	2	EAST
201504	2015	FALL	343	76	158757		5.8	71	2	EAST
201504	2015	FALL	343	76	158763		5.43	66	2	EAST
201504	2015	FALL	345	76	159909		6.13	65	1	EAST
201504	2015	FALL	345	76	159913		5.35	54	2	EAST
201504	2015	FALL	346	76	160243		5.2	58	2	EAST
201504	2015	FALL	346	76	160264		4.25	40	2	EAST
201504	2015	FALL	346	76	160286		5.44	49	1	EAST
201504	2015	FALL	347	76	160778		5.66	64	1	WEST
201504	2015	FALL	347	76	160795		6.38	71	1	WEST
201504	2015	FALL	349	76	161936		6.03	59	2	WEST
201504	2015	FALL	353	76	164697		5.64	58	1	WEST
201504	2015	FALL	353	76	164725		5.88	62	1	WEST
201504	2015	FALL	353	76	164727		4.64	46	1	WEST
201504	2015	FALL	356	76	166680		4.46	48	1	WEST
201504	2015	FALL	357	76	167230		4.46	44	1	WEST
201504	2015	FALL	357	76	167233		5.82	61	1	WEST
201504	2015	FALL	358	76	167904		3.12	23	2	WEST
201504	2015	FALL	359	76	168099		5.3	55	2	WEST
201504	2015	FALL	359	76	168102		5.07	55	2	WEST
201504	2015	FALL	359	76	168103		5.3	57	1	WEST
201504	2015	FALL	359	76	168106		5.39	58	1	WEST
201504	2015	FALL	359	76	168114		5.26	63	2	WEST
201504	2015	FALL	360	76	168655		4.08	38	2	WEST
201504	2015	FALL	360	76	168658		5.7	62	1	WEST
201504	2015	FALL	360	76	168668		6.06	70	1	WEST
201504	2015	FALL	362	76	169953		4.06	35	1	WEST
201504	2015	FALL	362	76	169964		3.91	35	2	WEST
201504	2015	FALL	362	76	170249		4.28	39	2	WEST
201504	2015	FALL	362	76	170400		4.36	39	2	WEST
201504	2015	FALL	365	76	172609		4.07	32	1	WEST
201504	2015	FALL	365	76	172612		4.52	42	2	WEST
201504	2015	FALL	365	76	172666		4.16	34	2	WEST
201504	2015	FALL	365	76	172686		3.96	34	2	WEST
201504	2015	FALL	365	76	172697		3.88	30	2	WEST
201504	2015	FALL	365	76	172700		4.4	37	2	WEST
201504	2015	FALL	366	76	174182		3.18	28	2	WEST
201504	2015	FALL	366	76	174189		3.46	28	2	WEST
201504	2015	FALL	367	76	175002		3.23	26	2	WEST
201504	2015	FALL	367	76	175024		2.79	22	1	WEST
201504	2015	FALL	367	76	175065		3.18	25	2	WEST
201504	2015	FALL	367	76	175165		3.08	23	1	WEST
201504	2015	FALL	368	76	176747	9.72	3.12	22	2	WEST
201504	2015	FALL	370	76	177282		4.57	36	2	WEST
201504	2015	FALL	370	76	177303		4.37	40	2	WEST
201504	2015	FALL	370	76	177372		3.61	31	2	WEST
201504	2015	FALL	370	76	177380		4.19	31	2	WEST
201504	2015	FALL	370	76	177393		3.4	26	1	WEST
201504	2015	FALL	370	76	177415		3.61	28	2	WEST
201504	2015	FALL	370	76	177461		3.25	27	1	WEST
201504	2015	FALL	371	76	178680		4.32	36	2	WEST
201504	2015	FALL	372	76	178872		3.68	34	2	WEST
201504	2015	FALL	372	76	178897		3.28	25	2	WEST
201504	2015	FALL	372	76	178923		3.28	27	2	WEST
201504	2015	FALL	377	76	183595		3.78	28	2	WEST
201504	2015	FALL	377	76	183627		3.55	29	2	WEST
201504	2015	FALL	377	76	183635		4.24	36	2	WEST
201504	2015	FALL	380	76	184629		3.44	30	2	WEST
201504	2015	FALL	380	76	184667		3.64	30	2	WEST
201504	2015	FALL	380	76	184720		3.38	28	2	WEST
201504	2015	FALL	381	76	185384		4.17	38	2	WEST
201504	2015	FALL	382	76	185900		3.65	31	1	WEST
201504	2015	FALL	383	76	186626		3.7	30	1	WEST
201504	2015	FALL	383	76	186642		3.77	31	2	WEST
201504	2015	FALL	383	76	186652	9.82	3.23	23	1	WEST
201504	2015	FALL	383	76	186656		3.51	25	2	WEST
201504	2015	FALL	383	76	187083		3.49	26	2	WEST
201504	2015	FALL	384	76	187893		3.69	28	2	WEST
201504	2015	FALL	384	76	188515		3.41	26	1	WEST
201504	2015	FALL	385	76	189501		3.65	30	1	WEST
201504	2015	FALL	385	76	189534	10.97	3.11	24	2	WEST
201504	2015	FALL	385	76	189557	9.58	2.95	20	2	WEST
201504	2015	FALL	387	76	190600		5.56	57	2	WEST
201504	2015	FALL	388	76	191698		5.31	53	2	WEST
201504	2015	FALL	388	76	191701		6.65	72	1	WEST
201504	2015	FALL	388	76	191716		5.08	51	1	WEST
201504	2015	FALL	388	76	191720		4.52	42	2	WEST
201504	2015	FALL	388	76	191741		3.97	41	2	WEST
201504	2015	FALL	388	76	191744		4.38	37	1	WEST
201504	2015	FALL	389	76	192312		5.4	57	2	WEST
201504	2015	FALL	389	76	192333		6.65	81	2	WEST
201504	2015	FALL	390	76	192890		5.61	64	2	WEST
201504	2015	FALL	390	76	192908		5.34	56	1	WEST
201504	2015	FALL	390	76	192919		6.64	84	2	WEST
201504	2015	FALL	391	76	194056		6.81	76	2	WEST
201504	2015	FALL	391	76	194060		5.5	66	2	WEST
201504	2015	FALL	391	76	194064		6.33	65	1	WEST
201504	2015	FALL	392	76	194386		4.44	37	1	WEST
201504	2015	FALL	392	76	194535		5.27	58	2	WEST
201504	2015	FALL	393	76	195202		5.16	56	1	WEST
201504	2015	FALL	393	76	195226		6.16	64	2	WEST
201504	2015	FALL	393	76	195231		5.65	63	1	WEST
201504	2015	FALL	393	76	195245		5.6	57	2	WEST
201504	2015	FALL	394	76	195668		5.66	56	2	WEST
201504	2015	FALL	394	76	195672		7.18	96	2	WEST
201504	2015	FALL	395	76	196373		4.51	43	1	WEST
201504	2015	FALL	395	76	196378		6.1	63	2	WEST
201504	2015	FALL	395	76	196390		6.43	69	2	WEST
201504	2015	FALL	396	76	197181		5.93	73	2	WEST
201504	2015	FALL	396	76	197195		5.18	55	2	WEST
201504	2015	FALL	396	76	197205		4.82	45	2	WEST
201504	2015	FALL	397	76	197529		5.78	67	2	WEST
201504	2015	FALL	397	76	197534		5.8	53	1	WEST
201504	2015	FALL	397	76	197545		5.64	61	2	WEST
201504	2015	FALL	397	76	197555		4.61	47	2	WEST
201504	2015	FALL	397	76	197557		4.37	41	2	WEST
201504	2015	FALL	397	76	197560		4.42	43	2	WEST
201504	2015	FALL	398	76	198063		6.23	66	2	EAST
201504	2015	FALL	398	76	198090		4.51	45	2	EAST
201504	2015	FALL	399	76	198627		5.73	68	2	EAST
201504	2015	FALL	399	76	198630		5.15	48	1	EAST
201504	2015	FALL	399	76	198653		6.24	68	2	EAST
201504	2015	FALL	400	76	199111		5.55	50	1	EAST
201504	2015	FALL	400	76	199114		5.27	57	2	EAST
201504	2015	FALL	400	76	199126		4.51	38	1	EAST
201504	2015	FALL	400	76	199150		5.47	60	1	EAST
201504	2015	FALL	402	76	200378		6.1	66	2	EAST
201504	2015	FALL	402	76	200400		5.07	61	2	EAST
201504	2015	FALL	402	76	200406		5.56	53	1	EAST
201504	2015	FALL	402	76	200417		4.8	48	1	EAST
201504	2015	FALL	403	76	200653		4.02	37	1	EAST
201504	2015	FALL	403	76	200655		4.34	38	1	EAST
201504	2015	FALL	403	76	200656		5.29	56	1	EAST
201504	2015	FALL	403	76	200661		4.51	40	2	EAST
201504	2015	FALL	403	76	200666		4.17	42	2	EAST
201504	2015	FALL	403	76	200667		4.27	42	2	EAST
201504	2015	FALL	403	76	200682		3.95	34	1	EAST
201504	2015	FALL	403	76	200694		4.2	43	2	EAST
201504	2015	FALL	403	76	200716		4.38	43	2	EAST
201504	2015	FALL	403	76	200729		4.21	37	2	EAST
201504	2015	FALL	403	76	200736		3.9	33	1	EAST
201504	2015	FALL	403	76	200743		5.64	59	1	EAST
201504	2015	FALL	403	76	200745		3.76	34	2	EAST
201504	2015	FALL	403	76	200749		2.76	19	1	EAST
201504	2015	FALL	403	76	200751		5.79	61	2	EAST
201504	2015	FALL	403	76	200752		4.62	44	2	EAST
201504	2015	FALL	403	76	200753		5.54	60	2	EAST
201504	2015	FALL	403	76	200755		4.77	45	2	EAST
201504	2015	FALL	403	76	200756		4.63	45	2	EAST
201504	2015	FALL	403	76	200760		4.19	39	1	EAST
201504	2015	FALL	403	76	200986		4.56	47	2	EAST
201504	2015	FALL	403	76	200992		4.12	36	2	EAST
201504	2015	FALL	403	76	200999		3.94	33	2	EAST
201504	2015	FALL	403	76	201001		3.05	25	2	EAST
201504	2015	FALL	403	76	201034		3.17	24	1	EAST
201504	2015	FALL	403	76	201060		2.72	17	1	EAST
201504	2015	FALL	403	76	201199	9.36	2.95	23	1	EAST
201504	2015	FALL	404	76	201349		5.08	48	2	EAST
201504	2015	FALL	404	76	201359		5.43	60	2	EAST
201504	2015	FALL	404	76	201374		4.72	48	2	EAST
201504	2015	FALL	404	76	201376		5.27	59	2	EAST
201504	2015	FALL	404	76	201381		5.48	61	2	EAST
201504	2015	FALL	404	76	201382		4.78	46	1	EAST
201504	2015	FALL	404	76	201386		5.43	55	2	EAST
201504	2015	FALL	404	76	201388		5.37	53	2	EAST
201504	2015	FALL	404	76	201390		4.47	43	2	EAST
201504	2015	FALL	404	76	201394		4.85	50	1	EAST
201504	2015	FALL	404	76	201395		4.38	42	2	EAST
201504	2015	FALL	404	76	201396		4.19	39	1	EAST
201504	2015	FALL	404	76	201401		4.31	37	1	EAST
201504	2015	FALL	404	76	201404		4.1	39	1	EAST
201504	2015	FALL	404	76	201408		4.3	38	1	EAST
201504	2015	FALL	404	76	201410		4.46	40	1	EAST
201504	2015	FALL	404	76	201413		4.09	34	2	EAST
201504	2015	FALL	404	76	201417		4.07	34	1	EAST
201504	2015	FALL	404	76	201421		4.67	47	2	EAST
201504	2015	FALL	404	76	201424		3.93	35	1	EAST
201504	2015	FALL	405	76	201708		4.09	31	1	WEST
201504	2015	FALL	405	76	201709		4.37	39	2	WEST
201504	2015	FALL	405	76	201714		4.12	34	1	WEST
201504	2015	FALL	405	76	201718	18.41	4.43	42	2	WEST
201504	2015	FALL	405	76	201725	16.47	4.53	39	2	WEST
201504	2015	FALL	405	76	201730		4.52	43	2	WEST
201504	2015	FALL	405	76	201788		4.91	49	2	WEST
201504	2015	FALL	405	76	201797		3.89	32	1	WEST
201504	2015	FALL	405	76	201811		4.6	41	2	WEST
201504	2015	FALL	405	76	201828	13.72	3.85	33	1	WEST
201504	2015	FALL	405	76	201829	15.19	4.29	37	2	WEST
201504	2015	FALL	405	76	201831		4.22	40	2	WEST
201504	2015	FALL	405	76	201838	13.23	4.24	36	2	WEST
201504	2015	FALL	405	76	201851		4.51	44	2	WEST
201504	2015	FALL	405	76	201856		4.16	33	1	WEST
201504	2015	FALL	405	76	201857	14.24	3.83	32	1	WEST
201504	2015	FALL	405	76	201864		3.86	31	1	WEST
201504	2015	FALL	405	76	201878	15.7	4.09	36	1	WEST
201504	2015	FALL	405	76	201898	17.74	4.79	41	2	WEST
201504	2015	FALL	405	76	201944	17.4	4.76	42	2	WEST
201504	2015	FALL	406	76	202707	14.02	4.16	31	1	WEST
201504	2015	FALL	406	76	202710		3.77	33	2	WEST
201504	2015	FALL	406	76	202718	14.58	3.93	34	1	WEST
201504	2015	FALL	406	76	202730	13.14	4.13	34	2	WEST
201504	2015	FALL	406	76	202743		2.95	21	2	WEST
201504	2015	FALL	406	76	202752	13.65	3.87	30	1	WEST
201504	2015	FALL	406	76	202774		4.35	39	2	WEST
201504	2015	FALL	406	76	202798		3.9	32	1	WEST
201504	2015	FALL	406	76	202812		3.88	33	1	WEST
201504	2015	FALL	406	76	202837	10.32	3.05	24	1	WEST
201504	2015	FALL	406	76	202859		3.22	23	1	WEST
201504	2015	FALL	406	76	202869		2.91	23	1	WEST
201504	2015	FALL	406	76	202905	14.74	3.97	32	1	WEST
201504	2015	FALL	406	76	202919		2.86	21	1	WEST
201504	2015	FALL	406	76	202943		3.65	35	1	WEST
201504	2015	FALL	406	76	202964		3.44	30	1	WEST
201504	2015	FALL	406	76	202970	14.68	4.13	36	2	WEST
201504	2015	FALL	406	76	202975		2.81	18	1	WEST
201504	2015	FALL	407	76	203136		4.47	38	1	WEST
201504	2015	FALL	407	76	203138	14.58	4.08	33	1	WEST
201504	2015	FALL	407	76	203154		3.22	23	1	WEST
201504	2015	FALL	407	76	203171		3.14	24	1	WEST
201504	2015	FALL	407	76	203195	9.32	3	21	1	WEST
201504	2015	FALL	407	76	203197		3.2	28	1	WEST
201504	2015	FALL	407	76	203256		3.43	28	2	WEST
201504	2015	FALL	407	76	203268		3.49	29	2	WEST
201504	2015	FALL	407	76	203287		3.16	21	2	WEST
201504	2015	FALL	407	76	203520		3.44	31	1	WEST
201504	2015	FALL	408	76	204081	9.39	2.92	19	1	WEST
201504	2015	FALL	408	76	204088		3.01	20	2	WEST
201504	2015	FALL	408	76	204093	8.82	2.46	19	2	WEST
201504	2015	FALL	408	76	204096	9.84	3.07	21	1	WEST
201504	2015	FALL	408	76	204098		2.88	21	1	WEST
201504	2015	FALL	408	76	204100		3.03	22	1	WEST
201504	2015	FALL	408	76	204101	11.45	3.3	24	1	WEST
201504	2015	FALL	408	76	204102	9.13	3.03	25	1	WEST
201504	2015	FALL	408	76	204104		2.65	20	1	WEST
201504	2015	FALL	408	76	204106		3.38	31	2	WEST
201504	2015	FALL	408	76	204107	10.71	3.21	24	1	WEST
201504	2015	FALL	408	76	204109	11.09	3.53	26	2	WEST
201504	2015	FALL	408	76	204114		3.17	23	1	WEST
201504	2015	FALL	408	76	204117		2.93	22	1	WEST
201504	2015	FALL	408	76	204120		3.4	28	2	WEST
201504	2015	FALL	408	76	204163	8.02	2.56	16	0	WEST
201504	2015	FALL	409	76	204782	10.26	3.21	22	1	WEST
201504	2015	FALL	409	76	204790		3.85	27	2	WEST
201504	2015	FALL	409	76	204817	15.47	4.35	35	2	WEST
201504	2015	FALL	409	76	204823	11.16	3.3	24	1	WEST
201504	2015	FALL	409	76	204832		3.16	25	1	WEST
201504	2015	FALL	409	76	204839		3.4	26	1	WEST
201504	2015	FALL	409	76	204867		3.45	28	1	WEST
201504	2015	FALL	409	76	204879		2.97	21	1	WEST
201504	2015	FALL	409	76	204886		3.47	28	1	WEST
201504	2015	FALL	409	76	204893		3.88	30	2	WEST
201504	2015	FALL	409	76	204895		3.71	32	2	WEST
201504	2015	FALL	409	76	204903		3.83	30	2	WEST
201504	2015	FALL	409	76	204930		3.34	23	1	WEST
201504	2015	FALL	409	76	205020		3.36	29	1	WEST
201504	2015	FALL	411	76	206315		3.4	26	1	WEST
201504	2015	FALL	411	76	206320		3.4	22	1	WEST
201504	2015	FALL	411	76	206322		3.45	28	1	WEST
201504	2015	FALL	411	76	206499		4.1	35	1	WEST
201504	2015	FALL	411	76	206524		3	23	2	WEST
201504	2015	FALL	411	76	206572		2.92	20	1	WEST
201504	2015	FALL	411	76	206593		3.07	22	2	WEST
201504	2015	FALL	411	76	206604		2.79	21	1	WEST
201504	2015	FALL	411	76	206610		3.48	29	1	WEST
201504	2015	FALL	411	76	206648		2.93	20	1	WEST
201504	2015	FALL	411	76	206655	9.71	3	19	1	WEST
201504	2015	FALL	411	76	206666		3.04	21	2	WEST
201504	2015	FALL	412	76	206758		4.23	38	2	WEST
201504	2015	FALL	412	76	206762	16.07	4.49	36	1	WEST
201504	2015	FALL	412	76	206765	15.21	3.99	33	1	WEST
201504	2015	FALL	412	76	206785	16.59	4.18	38	1	WEST
201504	2015	FALL	412	76	206792	14.78	4.29	37	1	WEST
201504	2015	FALL	412	76	206795	14.82	4.4	35	2	WEST
201504	2015	FALL	412	76	206800	15.35	4.22	33	2	WEST
201504	2015	FALL	412	76	206802		3.16	26	2	WEST
201504	2015	FALL	413	76	207294		4.23	44	2	WEST
201504	2015	FALL	413	76	207321	15.04	4.12	34	2	WEST
201504	2015	FALL	413	76	207330	16.83	4.38	43	2	WEST
201504	2015	FALL	413	76	207338	17.28	4.27	40	2	WEST
201504	2015	FALL	413	76	207342		4.51	40	2	WEST
201504	2015	FALL	413	76	207352	15.99	3.98	35	1	WEST
201504	2015	FALL	413	76	207396	14.32	3.82	34	1	WEST
201504	2015	FALL	413	76	207414		4.12	37	1	WEST
201504	2015	FALL	413	76	207431		3.92	33	1	WEST
201504	2015	FALL	413	76	207435	14.33	4.4	36	1	WEST
201504	2015	FALL	414	76	208201	15.81	4.37	39	2	WEST
201504	2015	FALL	414	76	208210		3.9	35	1	WEST
201504	2015	FALL	414	76	208216		4.02	34	2	WEST
201504	2015	FALL	414	76	208223		4.07	35	1	WEST
201504	2015	FALL	414	76	208233		3.12	26	2	WEST
201504	2015	FALL	414	76	208249	10.94	3.56	27	2	WEST
201504	2015	FALL	414	76	208257		3.31	27	2	WEST
201504	2015	FALL	414	76	208272		4.39	36	1	WEST
201504	2015	FALL	414	76	208289		4.63	42	1	WEST
201504	2015	FALL	414	76	208292		3.87	37	1	WEST
201504	2015	FALL	414	76	208305		4.23	36	1	WEST
201504	2015	FALL	415	76	208649	15.49	4.48	35	1	WEST
201504	2015	FALL	415	76	208652		4.59	36	2	WEST
201504	2015	FALL	415	76	208662		5.09	38	2	WEST
201504	2015	FALL	415	76	208683	15.64	4.36	35	2	WEST
201504	2015	FALL	415	76	208695		4.29	37	2	WEST
201504	2015	FALL	415	76	208696		3.11	26	1	WEST
201504	2015	FALL	415	76	208698		3.52	30	2	WEST
201504	2015	FALL	415	76	208705	8.96	3.05	18	1	WEST
201504	2015	FALL	416	76	209172		3.86	30	1	WEST
201504	2015	FALL	416	76	209191		3.37	27	1	WEST
201504	2015	FALL	416	76	209301	15.56	4.08	34	1	WEST
201504	2015	FALL	416	76	209306		3.25	25	1	WEST
201504	2015	FALL	416	76	209319		3.45	26	2	WEST
201504	2015	FALL	416	76	209350		3.65	32	1	WEST
201504	2015	FALL	416	76	209352		4.15	35	2	WEST
201504	2015	FALL	416	76	209353	10.47	3.06	22	1	WEST
201504	2015	FALL	416	76	209355		4.24	37	2	WEST
201504	2015	FALL	416	76	209386		3.95	31	1	WEST
201504	2015	FALL	416	76	209388		4.03	38	2	WEST
201504	2015	FALL	417	76	209666		4.2	36	2	WEST
201504	2015	FALL	417	76	209671		3.89	38	2	WEST
201504	2015	FALL	417	76	210313		3.56	27	1	WEST
201504	2015	FALL	418	76	210465	13.59	4.03	33	2	WEST
201504	2015	FALL	418	76	210471		3.91	33	2	WEST
201504	2015	FALL	418	76	210473	13.09	3.66	30	2	WEST
201504	2015	FALL	418	76	210491		4.06	32	1	WEST
201504	2015	FALL	418	76	210501	15.51	4.43	38	2	WEST
201504	2015	FALL	418	76	210502		3.6	27	1	WEST
201504	2015	FALL	418	76	210507	16.36	4.11	38	2	WEST
201504	2015	FALL	418	76	210514		3.76	27	1	WEST
201504	2015	FALL	418	76	210551		3.81	31	1	WEST
201504	2015	FALL	418	76	210593	13.81	4.14	35	2	WEST
201504	2015	FALL	418	76	210601		3.62	28	2	WEST
201504	2015	FALL	418	76	210629		3.07	23	1	WEST
201504	2015	FALL	418	76	210638		3.43	24	1	WEST
201504	2015	FALL	418	76	210641		3.02	24	2	WEST
201504	2015	FALL	418	76	210642	13.59	3.76	29	1	WEST
201504	2015	FALL	418	76	210660		4	34	2	WEST
201504	2015	FALL	418	76	210684	10.03	3.05	21	2	WEST
201504	2015	FALL	418	76	210727		3.6	30	2	WEST
201504	2015	FALL	419	76	210780		3.2	27	2	WEST
201504	2015	FALL	419	76	210785		3.72	31	1	WEST
201504	2015	FALL	419	76	210787		3.69	28	1	WEST
201504	2015	FALL	419	76	210795		3.72	32	2	WEST
201504	2015	FALL	419	76	210801	13.19	3.58	29	2	WEST
201504	2015	FALL	419	76	210805		4.1	37	1	WEST
201504	2015	FALL	419	76	210812		3.99	36	1	WEST
201504	2015	FALL	419	76	210813		3.31	27	1	WEST
201504	2015	FALL	419	76	210820		4.12	32	1	WEST
201504	2015	FALL	419	76	210830		3.91	33	1	WEST
201504	2015	FALL	419	76	210835	13.25	3.92	31	2	WEST
201504	2015	FALL	419	76	210843		3.9	30	1	WEST
201504	2015	FALL	420	76	211458	13.79	3.91	31	2	WEST
201504	2015	FALL	420	76	211462	18.54	4.74	47	2	WEST
201504	2015	FALL	420	76	211464	18.4	5.28	51	2	WEST
201504	2015	FALL	420	76	211467		4.01	39	1	WEST
201504	2015	FALL	420	76	211469		4.23	37	2	WEST
201504	2015	FALL	421	76	212375	12.28	3.94	32	2	WEST
201504	2015	FALL	421	76	212380		3.95	32	1	WEST
201504	2015	FALL	421	76	212385		3.3	26	2	WEST
201504	2015	FALL	421	76	212391	13.28	3.66	28	1	WEST
201504	2015	FALL	421	76	212399	13.26	3.82	29	1	WEST
201504	2015	FALL	421	76	212407	12.57	3.64	25	1	WEST
201504	2015	FALL	422	76	213634	13.78	3.86	31	1	WEST
201504	2015	FALL	423	76	214817	12.48	3.78	30	1	WEST
201504	2015	FALL	423	76	214924		3.81	30	2	WEST
201504	2015	FALL	423	76	214933	15.05	3.87	34	2	WEST
201504	2015	FALL	423	76	214947	12.38	3.59	28	1	WEST
201504	2015	FALL	423	76	214958	14.86	4.11	31	2	WEST
201504	2015	FALL	423	76	214961	13.49	4.11	31	1	WEST
201504	2015	FALL	423	76	214964	14.48	3.95	34	1	WEST
201504	2015	FALL	423	76	214967		3.33	25	2	WEST
201504	2015	FALL	424	76	215614	18.76	5.17	56	2	WEST
201504	2015	FALL	425	76	216418	22.02	5.56	59	2	WEST
201504	2015	FALL	425	76	216427	20.25	4.8	46	1	WEST
201504	2015	FALL	427	76	217693	25.87	6.48	77	2	WEST
201504	2015	FALL	427	76	217708	19.88	5.28	51	1	WEST
201504	2015	FALL	427	76	217717	19.74	4.98	45	2	WEST
201504	2015	FALL	428	76	219124	21.84	5.25	52	2	WEST
201504	2015	FALL	429	76	219986	15.83	4.44	39	1	WEST
201504	2015	FALL	429	76	219992		3.9	33	1	WEST
201504	2015	FALL	429	76	219996		2.65	18	1	WEST
201504	2015	FALL	429	76	219999		4.35	39	1	WEST
201504	2015	FALL	431	76	222073		4.58	37	1	WEST
201504	2015	FALL	431	76	222080	11.94	3.08	27	2	WEST
201504	2015	FALL	431	76	222099	12.47	3.78	27	2	WEST
201504	2015	FALL	431	76	222104		3.76	31	2	WEST
201504	2015	FALL	431	76	222144	15.96	4.76	38	2	WEST
201504	2015	FALL	431	76	222160	13.5	3.69	30	1	WEST
201504	2015	FALL	431	76	222177	12.92	3.99	29	2	WEST
201504	2015	FALL	431	76	222204	13.44	3.95	30	2	WEST
201570	2015	SUMMER	1	76	209	28.04	6.54	71.4	2	WEST
201570	2015	SUMMER	1	76	256	24.14	5.8	66.5	2	WEST
201570	2015	SUMMER	3	76	1653	14.07	3.9	29.6	2	WEST
201570	2015	SUMMER	4	76	2171	14.43	4.29	41.7	2	WEST
201570	2015	SUMMER	4	76	2197	22.46	5.3	58.3	2	WEST
201570	2015	SUMMER	4	76	2211	20.17	4.99	47.4	2	WEST
201570	2015	SUMMER	4	76	2212	31.06	6.48	78.6	2	WEST
201570	2015	SUMMER	4	76	2220	20.46	5.1	50.5	2	WEST
201570	2015	SUMMER	4	76	2255	16.39	4.17	37.9	1	WEST
201570	2015	SUMMER	5	76	2420	23.8	5.47	58.4	2	WEST
201570	2015	SUMMER	6	76	3317	17.8	4.8	39.9	2	WEST
201570	2015	SUMMER	7	76	3990	18.87	4.63	45.2	1	WEST
201570	2015	SUMMER	7	76	3991	14.19	3.62	31.3	1	WEST
201570	2015	SUMMER	7	76	3992	18.95	5.24	48.2	1	WEST
201570	2015	SUMMER	8	76	4487	21.47	5.2	53.1	1	WEST
201570	2015	SUMMER	9	76	5135	14.52	3.69	30.6	2	WEST
201570	2015	SUMMER	9	76	5140	16.46	3.91	37.2	2	WEST
201570	2015	SUMMER	9	76	5141	12.34	3.44	25.7	1	WEST
201570	2015	SUMMER	10	76	5751		3.51	30	2	WEST
201570	2015	SUMMER	10	76	5756	14.55	3.99	33	1	WEST
201570	2015	SUMMER	10	76	5784	15.89	4.3	36.8	2	WEST
201570	2015	SUMMER	12	76	6733	14.21	3.76	30.9	1	WEST
201570	2015	SUMMER	12	76	6747	17.16	4.3	39.6	2	WEST
201570	2015	SUMMER	12	76	6826	19.94	4.7	50.1	1	WEST
201570	2015	SUMMER	12	76	6910	17.84	4.99	44.8	1	WEST
201570	2015	SUMMER	12	76	6923	13.38	3.87	29	1	WEST
201570	2015	SUMMER	14	76	7285	15.68	4.19	37	1	WEST
201570	2015	SUMMER	14	76	7315	15.36	4.21	34.5	2	WEST
201570	2015	SUMMER	14	76	7379		3.79	28.1	1	WEST
201570	2015	SUMMER	14	76	7418	18.39	4.57	43	1	WEST
201570	2015	SUMMER	15	76	7868	13.65	3.58	28.3	1	WEST
201570	2015	SUMMER	15	76	7891	10.85	3.41	24.8	1	WEST
201570	2015	SUMMER	15	76	7892	15.54	4.1	37.3	2	WEST
201570	2015	SUMMER	15	76	7901	14	3.42	33.7	2	WEST
201570	2015	SUMMER	15	76	7944	23.66	5.79	61	1	WEST
201570	2015	SUMMER	16	76	8589	13.83	3.83	31.7	1	WEST
201570	2015	SUMMER	16	76	8618	13.5	3.7	30	2	WEST
201570	2015	SUMMER	16	76	8645	15.97	4.19	38.6	2	WEST
201570	2015	SUMMER	16	76	8688	11.72	3.65	25.2	2	WEST
201570	2015	SUMMER	16	76	8698	20.68	4.89	50.5	1	WEST
201570	2015	SUMMER	16	76	8726	17.38	4.51	41.5	2	WEST
201570	2015	SUMMER	17	76	9088	18.78	4.7	43.7	2	WEST
201570	2015	SUMMER	17	76	9100		5.95	70.5	2	WEST
201570	2015	SUMMER	17	76	9106	20.44	5.55	53.3	2	WEST
201570	2015	SUMMER	17	76	9126	23.23	5.2	56.9	2	WEST
201570	2015	SUMMER	17	76	9180	13.16	3.69	34.8	1	WEST
201570	2015	SUMMER	17	76	9201	31.6	6.88	87	2	WEST
201570	2015	SUMMER	18	76	9699	17.18	4.1	42.2	2	WEST
201570	2015	SUMMER	18	76	9700	15.69	4.11	37.7	2	WEST
201570	2015	SUMMER	18	76	9702	23.77	6.05	60.6	1	WEST
201570	2015	SUMMER	18	76	9705	15.02	4.2	33.3	1	WEST
201570	2015	SUMMER	18	76	9707	22.61	6.13	54.6	2	WEST
201570	2015	SUMMER	18	76	9711	13.58	3.3	28.1	1	WEST
201570	2015	SUMMER	19	76	10316	22.84	5.95	53.2	2	WEST
201570	2015	SUMMER	19	76	10318	15.53	4.04	35.9	2	WEST
201570	2015	SUMMER	19	76	10322	14.29	4.04	31.7	1	WEST
201570	2015	SUMMER	19	76	10332	13.76	3.66	28.6	1	WEST
201570	2015	SUMMER	19	76	10341	22.04	5.12	57.6	2	WEST
201570	2015	SUMMER	20	76	10711	19.67	4.95	53.7	2	WEST
201570	2015	SUMMER	20	76	10712	16.53	4.42	41.3	1	WEST
201570	2015	SUMMER	20	76	10713	15	4.05	34.8	2	WEST
201570	2015	SUMMER	20	76	10714	13.68	3.68	28.6	2	WEST
201570	2015	SUMMER	20	76	10718	16.07	4.2	40.3	2	WEST
201570	2015	SUMMER	21	76	11212	23.11	5.59	57.5	2	WEST
201570	2015	SUMMER	21	76	11213	26.33	5.92	67.6	2	WEST
201570	2015	SUMMER	21	76	11215	20.29	4.88	45.2	1	WEST
201570	2015	SUMMER	22	76	11750	17.11	4.28	37.5	2	WEST
201570	2015	SUMMER	22	76	11753	13.23	3.9	31.1	2	WEST
201570	2015	SUMMER	22	76	11758	17.05	4.49	41.3	1	WEST
201570	2015	SUMMER	22	76	11759	13.37	3.62	29.6	2	WEST
201570	2015	SUMMER	24	76	12666	16.64	4.52	39.1	2	WEST
201570	2015	SUMMER	24	76	12693	14.34	4.03	33.8	2	WEST
201570	2015	SUMMER	24	76	12703	12.22	3.62	30.4	1	WEST
201570	2015	SUMMER	24	76	12729	17.27	4.21	40.8	2	WEST
201570	2015	SUMMER	25	76	13459	20.4	4.8	50.8	2	WEST
201570	2015	SUMMER	25	76	13475	20.55	5.3	45.5	0	WEST
201570	2015	SUMMER	25	76	13507	23.02	5.4	56	2	WEST
201570	2015	SUMMER	25	76	13522	16.55	4.52	37.9	2	WEST
201570	2015	SUMMER	25	76	13554	13.5	3.87	28.6	2	WEST
201570	2015	SUMMER	26	76	14164	22.05	5.51	52.7	1	WEST
201570	2015	SUMMER	26	76	14198	17.01	4.75	40.7	2	WEST
201570	2015	SUMMER	26	76	14210	15.76	4.38	36.7	2	WEST
201570	2015	SUMMER	26	76	14230	15.22	3.88	34.9	2	WEST
201570	2015	SUMMER	26	76	14262	18.08	5.1	47.3	2	WEST
201570	2015	SUMMER	27	76	15201	18.19	4.78	41.7	1	WEST
201570	2015	SUMMER	30	76	15738	18.22	4.91	44.7	1	WEST
201570	2015	SUMMER	31	76	16609	24.73	6.48	67.2	2	WEST
201570	2015	SUMMER	31	76	16634		4	33	2	WEST
201570	2015	SUMMER	31	76	16658	17.23	4.66	39.2	2	WEST
201570	2015	SUMMER	31	76	16667	11.33	3.6	29.1	2	WEST
201570	2015	SUMMER	31	76	16672	17.37	4.28	40.6	1	WEST
201570	2015	SUMMER	32	76	17234	14.18	3.73	31	2	WEST
201570	2015	SUMMER	32	76	17302	13.75	3.58	29.9	2	WEST
201570	2015	SUMMER	34	76	17988	29.84	7.25	93.3	2	WEST
201570	2015	SUMMER	36	76	18570	15.83	4.12	37.3	1	WEST
201570	2015	SUMMER	37	76	18889	16.02	4.45	36.9	1	WEST
201570	2015	SUMMER	37	76	18893	19.09	4.25	41.7	1	WEST
201570	2015	SUMMER	37	76	18895	21.9	5.62	57.7	2	WEST
201570	2015	SUMMER	38	76	19190	30.8	7.39	86.7	2	WEST
201570	2015	SUMMER	38	76	19201	22.19	5.2	58	2	WEST
201570	2015	SUMMER	38	76	19218	22.72	5.59	52.9	2	WEST
201570	2015	SUMMER	38	76	19233	14.47	3.83	32.3	2	WEST
201570	2015	SUMMER	39	76	19415	19.18	4.63	47	1	WEST
201570	2015	SUMMER	39	76	19417	27.52	6.33	75.7	2	WEST
201570	2015	SUMMER	40	76	19751	14.14	3.97	33.1	1	WEST
201570	2015	SUMMER	41	76	20014	22.23	4.99	55.4	2	WEST
201570	2015	SUMMER	41	76	20030	25.47	6.14	64.9	1	WEST
201570	2015	SUMMER	41	76	20033	17.51	4.35	40.3	2	WEST
201570	2015	SUMMER	43	76	20405		4.46	41.4	1	WEST
201570	2015	SUMMER	43	76	20416	15.8	4.38	37.7	2	WEST
201570	2015	SUMMER	44	76	20712	18.07	4.61	44.8	2	WEST
201570	2015	SUMMER	45	76	20863	18.58	4.84	42.4	1	WEST
201570	2015	SUMMER	45	76	20865	20.76	4.96	51.3	2	WEST
201570	2015	SUMMER	45	76	20875	22.81	5.91	57.5	1	WEST
201570	2015	SUMMER	45	76	20878		6.25	77.4	2	WEST
201570	2015	SUMMER	45	76	20886	29.25	6.89	80.9	1	WEST
201570	2015	SUMMER	46	76	21125	21.73	5.26	54	2	WEST
201570	2015	SUMMER	46	76	21137	19.84	4.9	47.3	1	WEST
201570	2015	SUMMER	46	76	21139	25.06	6.26	75.6	2	WEST
201570	2015	SUMMER	46	76	21142	20.62	5.64	56.7	2	WEST
25152	2015	FALL	2	76	263973	24.72	5.76	66.5	2	WEST
25152	2015	FALL	5	76	264064	23.88	5.53	60.4	2	WEST
25152	2015	FALL	6	76	263978	23.77	5.84	64.8	2	WEST
25152	2015	FALL	6	76	263979	26.11	5.95	73.6	2	WEST
25152	2015	FALL	6	76	263980	28.17	6.84	74.2	1	WEST
25152	2015	FALL	6	76	263981	29.48	6.64	85	2	WEST
25152	2015	FALL	6	76	263982	26.11	5.97	65.4	1	WEST
25152	2015	FALL	6	76	263983	22.31	5.72	65.7	2	WEST
25152	2015	FALL	9	76	264063	24.93	5.41	61.5	2	EAST
25152	2015	FALL	10	76	263988		5.76	61.8	2	EAST
25152	2015	FALL	10	76	263989	23.62	5.58	60.4	2	EAST
25152	2015	FALL	10	76	263990	22.61	5.91	67.8	2	EAST
25152	2015	FALL	10	76	263991	27.4	5.81	70.1	1	EAST
25152	2015	FALL	10	76	263992	24.61	5.95	61	1	EAST
25152	2015	FALL	10	76	263993	25	5.79	60.5	1	EAST
25152	2015	FALL	10	76	263994	25.23	5.64	62.2	2	EAST
25152	2015	FALL	10	76	263995	27.57	6.6	66.7	2	EAST
25152	2015	FALL	10	76	263996	24.64	6.21	67.3	2	EAST
25152	2015	FALL	10	76	263997	24.89	6.4	64.8	2	EAST
25152	2015	FALL	10	76	263998	27.03	5.65	67.2	2	EAST
25152	2015	FALL	10	76	263999	27.28	6.64	78.1	2	EAST
25152	2015	FALL	10	76	264000	25.3	6.05	72.6	2	EAST
25152	2015	FALL	10	76	264001	21.62	6.26	64.1	2	EAST
25152	2015	FALL	10	76	264002		5.5	60.2	2	EAST
25152	2015	FALL	10	76	264003	26.34	5.86	72	2	EAST
201404	2014	FALL	359	76	157270		5.02	46.5	2	WEST
201404	2014	FALL	359	76	157317		4.59	42	2	WEST
201404	2014	FALL	366	76	161735		4	36	1	WEST
201404	2014	FALL	368	76	162852		1.73	12	0	WEST
201404	2014	FALL	382	76	170733		4.64	46.5	2	WEST
201404	2014	FALL	383	76	171407		4.89	50	2	WEST
201404	2014	FALL	385	76	173142		4.62	40	1	WEST
201404	2014	FALL	386	76	174043	6.57	2.21	14	0	WEST
201404	2014	FALL	387	76	175090	7.07	2.25	14	0	EAST
201404	2014	FALL	391	76	176617		4.18	39.5	1	EAST
201404	2014	FALL	391	76	176832		4.85	41	1	EAST
201404	2014	FALL	392	76	177716	6.67	2.06	14	0	WEST
201404	2014	FALL	395	76	179546		5.42	57	2	EAST
201404	2014	FALL	395	76	179584	17.98	4.79	53	2	EAST
201404	2014	FALL	395	76	179796	5.08	1.71	9	0	EAST
201404	2014	FALL	397	76	181023		2.24	14	0	WEST
201404	2014	FALL	398	76	181683	5.85	1.92	12	0	EAST
201404	2014	FALL	403	76	184097		5.78	62.5	2	EAST
201404	2014	FALL	406	76	185727		5.32	52	2	EAST
201404	2014	FALL	415	76	190088		6.48	68	2	EAST
201404	2014	FALL	416	76	190839	6.51	2.12	13	0	EAST
201404	2014	FALL	417	76	191110	18.65	5.46	54	1	EAST
201404	2014	FALL	417	76	191379	7.12	2.24	13	0	EAST
201404	2014	FALL	421	76	193483		4.39	40.5	1	WEST
201404	2014	FALL	423	76	195518	6.29	2.02	12	0	WEST
201404	2014	FALL	424	76	196009	6.37	1.91	13	0	WEST
201404	2014	FALL	426	76	196717		3.15	24.5	1	WEST
201404	2014	FALL	433	76	202283		5.85	61	2	WEST
201404	2014	FALL	433	76	202305		5.32	54	1	WEST
201404	2014	FALL	434	76	202892		4.56	48.5	1	WEST
201404	2014	FALL	440	76	210106	6.3	2.08	11	0	WEST
201404	2014	FALL	443	76	212366		3.27	25.5	2	WEST
201404	2014	FALL	446	76	214264	6.44	1.94	12	0	WEST
201404	2014	FALL	447	76	214641		3.67	30	1	WEST
201404	2014	FALL	447	76	215433		2.91	21	1	WEST
201404	2014	FALL	457	76	223421		3.41	29.5	1	WEST
201470	2014	SUMMER	2	76	155460		5.8	56.2	1	WEST
201470	2014	SUMMER	2	76	155477		5.57	61.7	1	WEST
201470	2014	SUMMER	2	76	155488		6.14	68.8	2	WEST
201470	2014	SUMMER	5	76	255300	24.5	6.32	66.4	1	WEST
201470	2014	SUMMER	5	76	255311		5.28	57.2	1	WEST
201470	2014	SUMMER	5	76	255324	14.96	3.9	30.9	1	WEST
201470	2014	SUMMER	6	76	255920	23.03	5.79	60.9	1	WEST
201470	2014	SUMMER	7	76	256563	15.62	4.29	35	1	WEST
201470	2014	SUMMER	8	76	256913		3.95	32.2	1	WEST
201470	2014	SUMMER	8	76	256949		4.08	35.5	1	WEST
201470	2014	SUMMER	9	76	257720		6.35	77.7	2	WEST
201470	2014	SUMMER	9	76	257721	25.73	6.04	71.5	2	WEST
201470	2014	SUMMER	10	76	258438	22.86	5.54	58.3	2	WEST
201470	2014	SUMMER	11	76	259325		3.83	35	1	WEST
201470	2014	SUMMER	11	76	259348	21.65	5.59	57.1	2	WEST
201470	2014	SUMMER	14	76	157995	15.37	4.05	35.6	2	WEST
201470	2014	SUMMER	20	76	163224	15.24	4.22	34.9	1	WEST
201470	2014	SUMMER	20	76	163241	20.48	5.59	50.9	2	WEST
201470	2014	SUMMER	20	76	163271	26.57	6.45	67.4	1	WEST
201470	2014	SUMMER	21	76	164220	16.46	4.19	38.2	2	WEST
201470	2014	SUMMER	21	76	164231	13.72	3.87	31.1	1	WEST
201470	2014	SUMMER	22	76	165531		3.25	28.8	1	WEST
201470	2014	SUMMER	22	76	165557	15.74	4.2	35.1	2	WEST
201470	2014	SUMMER	22	76	165574	23.43	5.93	56.1	1	WEST
201470	2014	SUMMER	22	76	165603	26.63	6.4	71.5	2	WEST
201470	2014	SUMMER	22	76	165636	23.08	6.12	63.2	2	WEST
201470	2014	SUMMER	23	76	166560	14.11	3.75	33.1	1	WEST
201470	2014	SUMMER	23	76	166580	18.37	4.72	41.5	2	WEST
201470	2014	SUMMER	25	76	168563	24.06	5.6	61.3	2	WEST
201470	2014	SUMMER	25	76	168574		5.5	52.5	2	WEST
201470	2014	SUMMER	25	76	168591		6.16	68.3	2	WEST
201470	2014	SUMMER	26	76	169300	20.9	5.1	46.4	2	WEST
201470	2014	SUMMER	26	76	169315	18.16	4.81	44	1	WEST
201470	2014	SUMMER	26	76	169360	15.64	4	33.1	2	WEST
201470	2014	SUMMER	27	76	170017	25.73	5.94	60.8	2	WEST
201470	2014	SUMMER	27	76	170030	17.45	4.72	40	1	WEST
201470	2014	SUMMER	28	76	170737	27.26	6.66	74.2	2	WEST
201470	2014	SUMMER	28	76	170775	27.26	6.07	67.3	1	WEST
201470	2014	SUMMER	28	76	170792	21.82	5.38	53.5	1	WEST
201470	2014	SUMMER	28	76	170793	27.16	7.83	82.8	2	WEST
201470	2014	SUMMER	28	76	170794		6.7	90.2	2	WEST
201470	2014	SUMMER	29	76	171080	21.19	5.62	54.4	2	WEST
201470	2014	SUMMER	29	76	171101		4.26	37.5	2	WEST
201470	2014	SUMMER	29	76	171126		6.71	77.5	2	WEST
201470	2014	SUMMER	29	76	171161	25.19	6.03	67.3	2	WEST
201470	2014	SUMMER	29	76	171212	15.12	3.95	33.3	1	WEST
201470	2014	SUMMER	30	76	171517	21.75	5.33	51.3	2	WEST
201470	2014	SUMMER	30	76	171534		5.39	57	2	WEST
201470	2014	SUMMER	30	76	171558	25.04	6.17	70.4	1	WEST
201470	2014	SUMMER	30	76	171570	18.91	4.76	43.9	1	WEST
201470	2014	SUMMER	30	76	171584	20.18	5.17	48.2	1	WEST
201470	2014	SUMMER	31	76	171997	26.64	6.54	65.8	1	WEST
201470	2014	SUMMER	31	76	172027		4.11	33.7	1	WEST
201470	2014	SUMMER	31	76	172052	27.53	6.46	70.7	2	WEST
201470	2014	SUMMER	32	76	172671		4.26	34.1	1	WEST
201470	2014	SUMMER	32	76	172693	25.86	5.48	68.1	1	WEST
201470	2014	SUMMER	33	76	173570		6.21	72	2	WEST
201470	2014	SUMMER	33	76	173581		6.02	71.7	1	WEST
201470	2014	SUMMER	33	76	173586	31.87	8.38	104.8	2	WEST
201470	2014	SUMMER	34	76	174188	24.06	5.86	59.7	1	WEST
201470	2014	SUMMER	34	76	174213		5.97	64.4	1	WEST
201470	2014	SUMMER	34	76	174247		6.1	70.6	1	WEST
201470	2014	SUMMER	34	76	174284		4.28	36.6	2	WEST
201470	2014	SUMMER	34	76	174304		6.36	65.5	1	WEST
201470	2014	SUMMER	35	76	174872	17.3	4.71	36.8	2	EAST
201470	2014	SUMMER	35	76	174887	19.21	4.93	42.9	1	EAST
201470	2014	SUMMER	35	76	174917	25	5.58	61.6	1	EAST
201470	2014	SUMMER	35	76	174968	24.31	6.05	59.8	1	EAST
201470	2014	SUMMER	35	76	174988		6.58	67.7	1	EAST
201470	2014	SUMMER	35	76	175007	15.15	3.88	31.8	1	EAST
201470	2014	SUMMER	36	76	175897		3.71	30	2	WEST
201470	2014	SUMMER	36	76	175914		4.67	40.2	1	WEST
201470	2014	SUMMER	39	76	177631		5.58	59.3	2	WEST
201470	2014	SUMMER	39	76	177645		6.24	69.2	2	WEST
201470	2014	SUMMER	41	76	179676		5.15	48.4	1	WEST
201470	2014	SUMMER	41	76	179710	15.61	4.13	34.8	1	WEST
201470	2014	SUMMER	41	76	179740	15.04	3.87	35.7	2	WEST
201470	2014	SUMMER	42	76	180640		5.25	47.6	2	WEST
201470	2014	SUMMER	42	76	180682		4.38	35.1	1	WEST
201470	2014	SUMMER	42	76	180743	22.25	5.38	55.5	1	WEST
201470	2014	SUMMER	42	76	180797		6	63.6	1	WEST
201470	2014	SUMMER	43	76	181814	23.47	5.61	53.2	1	WEST
201470	2014	SUMMER	43	76	181868	29.99	6.65	80.5	2	WEST
201470	2014	SUMMER	44	76	183133	23.14	5.6	58.9	1	WEST
201470	2014	SUMMER	44	76	183145		4.53	37.3	2	WEST
201470	2014	SUMMER	44	76	183156	21.53	5.49	53.7	1	WEST
201470	2014	SUMMER	45	76	183538		5.62	61.3	2	WEST
201470	2014	SUMMER	45	76	183552	22.49	5.75	53.2	2	WEST
201470	2014	SUMMER	46	76	184162		4.29	38	2	WEST
201470	2014	SUMMER	46	76	184205		6.12	54.6	2	WEST
201470	2014	SUMMER	46	76	184219	17.89	4.68	43.9	1	WEST
201470	2014	SUMMER	46	76	184245	26.05	5.87	63.9	1	WEST
201470	2014	SUMMER	46	76	184281		5.4	58.7	2	WEST
201470	2014	SUMMER	46	76	184296		5.98	62.7	1	WEST
201470	2014	SUMMER	47	76	184533		4.7	42.5	2	WEST
201470	2014	SUMMER	50	76	185107		5.73	60.2	1	WEST
201470	2014	SUMMER	50	76	185125		5.38	54.9	2	WEST
201470	2014	SUMMER	50	76	185170	23.62	5.52	61.5	2	WEST
201470	2014	SUMMER	50	76	185195	15.65	4.47	32.9	2	WEST
201470	2014	SUMMER	51	76	185846		5.02	56	2	WEST
201470	2014	SUMMER	51	76	185967		4.92	47.3	1	WEST
201470	2014	SUMMER	52	76	186549		4.54	39.9	2	WEST
201470	2014	SUMMER	52	76	186583		5.49	57.2	2	WEST
201470	2014	SUMMER	52	76	186672	21.05	5.24	51	1	WEST
201470	2014	SUMMER	53	76	187753	26.52	6.36	69.5	2	WEST
201470	2014	SUMMER	53	76	187766	15.32	4.05	35.5	1	WEST
201470	2014	SUMMER	53	76	187809		4.26	41.1	2	WEST
201470	2014	SUMMER	53	76	187827	21.37	5.04	54.1	2	WEST
201470	2014	SUMMER	53	76	187854	20.29	5.27	49.4	1	WEST
201470	2014	SUMMER	53	76	187876	15.44	3.9	32.9	1	WEST
201470	2014	SUMMER	54	76	188502		4.4	43.3	2	WEST
201470	2014	SUMMER	54	76	188526		4.47	39.5	2	WEST
201470	2014	SUMMER	55	76	189431	16.76	4.24	39.1	1	WEST
201470	2014	SUMMER	57	76	191418		4.04	36.9	2	WEST
201470	2014	SUMMER	61	76	193203	21.73	5.04	57	2	WEST
201470	2014	SUMMER	61	76	193262	18.19	4.44	44.5	2	WEST
201470	2014	SUMMER	61	76	193293	26.6	6.9	74.5	1	WEST
201470	2014	SUMMER	61	76	193311	16.6	4.53	39	1	WEST
201470	2014	SUMMER	61	76	193364		6.17	65	1	WEST
201470	2014	SUMMER	62	76	194003		4.31	37.6	1	WEST
201470	2014	SUMMER	62	76	194026	19.35	4.59	44.8	1	WEST
201470	2014	SUMMER	62	76	194037	26.33	6.13	67.8	2	WEST
201470	2014	SUMMER	62	76	194042		6.1	67.4	1	WEST
201470	2014	SUMMER	63	76	194296		5.73	58.3	1	WEST
201470	2014	SUMMER	63	76	194315	26.45	6.26	68.8	1	WEST
201470	2014	SUMMER	63	76	194329	26.64	6.53	67.4	1	WEST
201470	2014	SUMMER	63	76	194351	25.12	5.87	62.2	2	WEST
201470	2014	SUMMER	63	76	194370	17.45	4.6	40.9	2	WEST
201470	2014	SUMMER	65	76	195346		6.15	71.3	2	WEST
201470	2014	SUMMER	65	76	195347	21.03	5.64	54.4	2	WEST
201470	2014	SUMMER	66	76	195668		5.74	61.3	2	WEST
201470	2014	SUMMER	66	76	195669	20.81	5.33	55.2	2	WEST
201470	2014	SUMMER	66	76	195681	20.64	5.34	49.9	1	WEST
201470	2014	SUMMER	67	76	195965	25.3	6.46	66.8	1	WEST
201470	2014	SUMMER	67	76	195968	24	6.34	62.1	1	WEST
201470	2014	SUMMER	67	76	195970	30.3	6.88	74.4	1	WEST
201470	2014	SUMMER	67	76	195972	25.87	5.73	74.8	2	WEST
201470	2014	SUMMER	73	76	196969		4.09	40.8	2	WEST
201470	2014	SUMMER	73	76	196970	21.16	5.27	54.7	2	WEST
201470	2014	SUMMER	73	76	196972	26.77	6.05	64.3	2	WEST
201470	2014	SUMMER	73	76	196973		5.82	60.4	2	WEST
201470	2014	SUMMER	73	76	196975	16.03	4.43	36	1	WEST
201470	2014	SUMMER	74	76	197327	14.13	3.7	30.4	1	WEST
201470	2014	SUMMER	75	76	197746		5.88	54.2	2	WEST
24141	2014	SPRING	8	76	256787		5.44	54.9	2	WEST
24141	2014	SPRING	9	76	256803		4.36	37.5	2	WEST
24141	2014	SPRING	9	76	256804		4.69	44.6	1	WEST
24141	2014	SPRING	11	76	256846		6.04	67.9	1	WEST
24141	2014	SPRING	11	76	256847	25.87	6.03	68.3	2	WEST
24141	2014	SPRING	11	76	256848		6.17	66.5	1	WEST
24141	2014	SPRING	13	76	256850	20	4.83	47.1	2	WEST
24141	2014	SPRING	13	76	256853		5.41	58.4	2	WEST
24141	2014	SPRING	13	76	256854	29.33	6.66	69.4	2	WEST
24141	2014	SPRING	13	76	257944		6.44	75.3	1	WEST
24141	2014	SPRING	21	76	257626	27.33	6.62	76.4	2	EAST
24141	2014	SPRING	23	76	256976		5.55	62.7	2	EAST
24141	2014	SPRING	25	76	256990		5.56	62.7	2	EAST
24141	2014	SPRING	26	76	256991		6.2	56.5	2	EAST
24141	2014	SPRING	26	76	257652	24.82	6.01	71	1	EAST
24141	2014	SPRING	27	76	256993		6.56	69.8	2	EAST
24141	2014	SPRING	27	76	256994		6.17	84.4	2	EAST
24141	2014	SPRING	27	76	256996	23.85	6.17	64.1	2	EAST
24141	2014	SPRING	32	76	256679	26.63	6.78	73.9	2	EAST
24141	2014	SPRING	32	76	257054	28.58	5.78	69.4	1	EAST
24141	2014	SPRING	33	76	256680	27.25	7.18	83.9	2	EAST
24141	2014	SPRING	33	76	256681	25.18	6.16	66.5	2	EAST
24141	2014	SPRING	33	76	257055		6.03	62.7	1	EAST
24141	2014	SPRING	33	76	257056	25.76	6.31	64.5	1	EAST
24141	2014	SPRING	33	76	257057	24.87	5.84	62.5	1	EAST
24141	2014	SPRING	33	76	257058	29.13	6.61	85	2	EAST
24141	2014	SPRING	33	76	257059		5.79	66.4	2	EAST
24141	2014	SPRING	33	76	257060	23.77	6.08	60.5	2	EAST
24141	2014	SPRING	33	76	257061	29.16	6.52	90.4	2	EAST
24141	2014	SPRING	34	76	256688	23.57	5.71	57.5	2	EAST
24141	2014	SPRING	35	76	257643	25.7	5.75	66.7	1	EAST
24141	2014	SPRING	36	76	257644	26.63	6.41	77.3	2	EAST
24142	2014	FALL	1	76	257641	28.16	7.12	73.1	1	WEST
24142	2014	FALL	1	76	257642	27.96	6.68	84.9	2	WEST
24142	2014	FALL	5	76	257909	34.71	8.11	103	2	WEST
24142	2014	FALL	5	76	257910	27.41	6.59	81.3	2	WEST
24142	2014	FALL	5	76	257911	28.95	6.71	91.8	2	WEST
24142	2014	FALL	5	76	257912	26.78	7.19	78.9	2	WEST
24142	2014	FALL	5	76	257919		6.64	89	2	WEST
24142	2014	FALL	5	76	257920	33.43	7.23	93.6	2	WEST
24142	2014	FALL	6	76	257676	29.69	6.91	85.4	2	WEST
24142	2014	FALL	10	76	257635		5.83	66.2	2	WEST
24142	2014	FALL	13	76	257639		5.8	72.8	1	EAST
24142	2014	FALL	13	76	257675	24.89	6.31	62.8	2	EAST
24142	2014	FALL	13	76	257899	24.51	5.75	62.7	1	EAST
24142	2014	FALL	13	76	257900	27.51	6.47	77.5	2	EAST
24142	2014	FALL	13	76	257901	28.54	6.78	74.4	1	EAST
24142	2014	FALL	13	76	257902	23.12	6.08	65.6	2	EAST
24142	2014	FALL	14	76	257885		5.36	62	2	EAST
24142	2014	FALL	14	76	257886	25.31	6.02	61.3	1	EAST
24142	2014	FALL	14	76	257887	26.41	5.96	69.6	2	EAST
24142	2014	FALL	14	76	257888	25.15	6.29	62.6	2	EAST
24142	2014	FALL	14	76	257889	23.97	6.02	65.7	2	EAST
24142	2014	FALL	14	76	257890	26.38	6.32	75.4	2	EAST
24142	2014	FALL	14	76	257891	23.78	6.09	62.5	2	EAST
24142	2014	FALL	14	76	257892	24.09	6.14	64	2	EAST
24142	2014	FALL	14	76	257893	25.52	5.97	64.3	2	EAST
24142	2014	FALL	14	76	257894	26.63	6.89	65.6	1	EAST
24142	2014	FALL	14	76	257895	25.45	5.78	61.9	1	EAST
24142	2014	FALL	14	76	257896	23.49	5.42	60.7	2	EAST
24142	2014	FALL	14	76	257897	25.84	5.47	61.6	2	EAST
24142	2014	FALL	14	76	257898		5.41	62.7	2	EAST
24142	2014	FALL	14	76	257903	24.23	5.56	65.9	2	EAST
24142	2014	FALL	14	76	257904	28.82	6.34	73.3	2	EAST
24142	2014	FALL	14	76	257905	24.09	5.92	59.5	1	EAST
24142	2014	FALL	14	76	257906	25.68	6.41	74.6	2	EAST
24142	2014	FALL	14	76	257907		6.46	72.7	2	EAST
24142	2014	FALL	14	76	257913	24.54	5.98	62.1	2	EAST
24142	2014	FALL	15	76	257686		7.35	86.9	2	EAST
24142	2014	FALL	15	76	257687		7.31	84.2	2	EAST
24142	2014	FALL	15	76	257689	26.83	6.13	69.5	1	EAST
24142	2014	FALL	15	76	257690	24.27	5.65	62.2	2	EAST
24142	2014	FALL	15	76	257691	27.04	6.55	78.7	2	EAST
24142	2014	FALL	15	76	257692	28.97	7.06	74.9	1	EAST
24142	2014	FALL	15	76	257693	25.07	6.26	64	2	EAST
24142	2014	FALL	15	76	257694	25.01	6.01	61.3	2	EAST
24142	2014	FALL	15	76	257695	26.86	6.21	71.5	2	EAST
24142	2014	FALL	15	76	257697		6.02	66.2	1	EAST
24142	2014	FALL	15	76	257698	26.04	6.8	72.9	1	EAST
24142	2014	FALL	15	76	257699	30.27	6.86	81.1	2	EAST
24142	2014	FALL	15	76	257701		6.53	67.3	2	EAST
24142	2014	FALL	15	76	257702	27.47	6.48	71	2	EAST
24142	2014	FALL	15	76	257704	26.89	6.39	72.2	2	EAST
24142	2014	FALL	15	76	257875	25.59	6.1	65.7	2	EAST
24142	2014	FALL	15	76	257876	26.02	6.17	63.1	2	EAST
24142	2014	FALL	15	76	257877	28.41	6.96	80.8	2	EAST
24142	2014	FALL	15	76	257878		5.75	68.5	1	EAST
24142	2014	FALL	15	76	257879	27.15	6.48	70.6	1	EAST
24142	2014	FALL	15	76	257880	22.77	5.74	67.3	2	EAST
24142	2014	FALL	16	76	257707	30.74	6.92	79.4	2	EAST
24142	2014	FALL	16	76	257852	30.83	7.07	86.5	2	EAST
24142	2014	FALL	16	76	257853	36.93	8.28	107	2	EAST
24142	2014	FALL	16	76	257855		6.56	80	2	EAST
24142	2014	FALL	16	76	257856	24.82	6.3	63.9	1	EAST
24142	2014	FALL	16	76	257857		6.52	71.4	2	EAST
24142	2014	FALL	16	76	257858	26.53	5.92	66	1	EAST
24142	2014	FALL	16	76	257859	30.24	6.87	90.2	2	EAST
24142	2014	FALL	16	76	257860		5.84	60.5	2	EAST
24142	2014	FALL	16	76	257861	23.54	5.55	62.7	2	EAST
24142	2014	FALL	16	76	257862	23.72	5.79	60.4	1	EAST
24142	2014	FALL	16	76	257864	28.27	6.21	75.6	2	EAST
24142	2014	FALL	16	76	257865	26.8	5.97	65.4	1	EAST
24142	2014	FALL	16	76	257866		6.35	64.1	1	EAST
24142	2014	FALL	16	76	257868	27.63	6.57	67.7	1	EAST
24142	2014	FALL	16	76	257872	25.29	6.18	66.7	2	EAST
24142	2014	FALL	16	76	257873	24.58	6.18	66.2	2	EAST
24142	2014	FALL	16	76	257874	32.53	7.73	93.8	2	EAST
24142	2014	FALL	17	76	257710		6.45	81.7	1	EAST
24142	2014	FALL	17	76	257719	25.48	6.44	66.3	1	EAST
24142	2014	FALL	17	76	257721	32.95	7.72	98.5	2	EAST
24142	2014	FALL	17	76	257722	25.58	6.25	72.9	2	EAST
24142	2014	FALL	17	76	257723		6.08	64.7	2	EAST
24142	2014	FALL	17	76	257726	26.62	6.47	69.1	1	EAST
24142	2014	FALL	17	76	257727		6.32	70.4	1	EAST
24142	2014	FALL	17	76	257728		7.16	90.8	2	EAST
24142	2014	FALL	17	76	257869		6.88	93.3	2	EAST
24142	2014	FALL	17	76	257871		6.76	84.2	2	EAST
24142	2014	FALL	18	76	257715	25.5	6.35	71.1	1	WEST
24142	2014	FALL	19	76	257711	23.7	5.97	68.1	2	WEST
24142	2014	FALL	19	76	257712	22.62	5.52	62.9	1	WEST
24142	2014	FALL	21	76	257731		7.03	78.5	2	WEST
24142	2014	FALL	21	76	257839		6.25	70.3	2	WEST
24142	2014	FALL	22	76	257735		6.14	75.7	2	WEST
24142	2014	FALL	23	76	257747	24.98	6.33	73.7	2	WEST
24142	2014	FALL	23	76	257748		6.79	74.4	1	WEST
24142	2014	FALL	24	76	257751	30.65	6.82	80	2	EAST
24142	2014	FALL	24	76	257752	26.5	6.68	66.4	1	EAST
24142	2014	FALL	24	76	257753		6.21	65.8	2	EAST
24142	2014	FALL	24	76	257812		5.98	64.9	2	EAST
24142	2014	FALL	24	76	257813	25.66	5.89	65.8	2	EAST
24142	2014	FALL	24	76	257814	23.01	5.89	61.7	2	EAST
24142	2014	FALL	24	76	257816	24.36	5.95	68	1	EAST
24142	2014	FALL	25	76	257802	24.46	5.32	60.8	2	EAST
24142	2014	FALL	25	76	257803	29.92	7.1	86.8	2	EAST
24142	2014	FALL	25	76	257804		6.21	62.9	2	EAST
24142	2014	FALL	25	76	257805		6.54	72.6	1	EAST
24142	2014	FALL	28	76	257772	23.1	5.9	66.9	1	WEST
24142	2014	FALL	28	76	257773	25.57	5.99	69.9	2	WEST
24142	2014	FALL	28	76	257780	28.83	6.55	74.6	2	WEST
24143	2014	FALL	5	76	257776		5.64	66.4	1	WEST
24143	2014	FALL	5	76	257777		6.1	61.9	2	WEST
24143	2014	FALL	9	76	257491	25.4	6.12	66	2	WEST
24143	2014	FALL	9	76	257786		5.77	62.9	2	WEST
24143	2014	FALL	9	76	257787		5.8	73.9	2	WEST
24143	2014	FALL	9	76	257788		6.63	78	2	WEST
24143	2014	FALL	9	76	257789	28.76	6.54	74	1	WEST
24143	2014	FALL	9	76	257790	23.27	5.84	61	2	WEST
24143	2014	FALL	9	76	257791		6.59	89.5	2	WEST
25142	2014	FALL	2	76	257327	23.76	5.91	61.6	2	WEST
25142	2014	FALL	2	76	257328		6.46	76.6	2	WEST
25142	2014	FALL	11	76	257330		6.84	76.2	2	WEST
25142	2014	FALL	11	76	257331		6.5	75	2	WEST
25142	2014	FALL	11	76	257332	32.61	8.23	109.2	2	WEST
25142	2014	FALL	11	76	257333	29.97	7.26	100	2	WEST
25142	2014	FALL	11	76	257334	31.74	7.29	85.7	2	WEST
25142	2014	FALL	11	76	257335	33.78	7.14	92.7	2	WEST
25142	2014	FALL	11	76	257336	29.06	6.81	80.4	2	WEST
25142	2014	FALL	11	76	257337	25.05	6.27	64.3	2	WEST
25142	2014	FALL	11	76	257609		6.45	76.3	1	WEST
25142	2014	FALL	11	76	257610	25.86	6.22	70.2	2	WEST
25142	2014	FALL	11	76	257611	29.66	6.82	79.6	2	WEST
25142	2014	FALL	11	76	257612		6.43	75.9	2	WEST
25142	2014	FALL	11	76	257613		6.19	72.5	2	WEST
25142	2014	FALL	12	76	257345	26.86	6.17	74.9	2	WEST
25142	2014	FALL	18	76	257344	21.66	5.75	59.6	2	WEST
25142	2014	FALL	19	76	257341		5.9	66.7	2	EAST
25142	2014	FALL	19	76	257351		6.29	71	1	EAST
25142	2014	FALL	19	76	257355		5.7	62.9	1	EAST
25142	2014	FALL	19	76	257357	25.58	6.83	66.9	1	EAST
25142	2014	FALL	20	76	257359	25.81	5.88	64.7	2	EAST
25142	2014	FALL	20	76	257360	28.38	6.51	76.8	2	EAST
25142	2014	FALL	20	76	257361		5.98	66.3	1	EAST
25142	2014	FALL	20	76	257364		6.36	66.2	2	EAST
25142	2014	FALL	20	76	257365		5.61	60.8	2	EAST
25142	2014	FALL	20	76	257366		6.32	71.3	2	EAST
25142	2014	FALL	20	76	257367	27.03	6.87	79.9	2	EAST
25142	2014	FALL	20	76	257369	25.59	5.97	61.3	2	EAST
25142	2014	FALL	20	76	257370	24.59	6.31	67.6	2	EAST
25142	2014	FALL	20	76	257371		6.03	61	2	EAST
25142	2014	FALL	20	76	257372	27.51	6.61	74.3	1	EAST
25142	2014	FALL	20	76	257375	23.37	6.13	61.3	2	EAST
25142	2014	FALL	20	76	257377	24.48	5.8	63.2	2	EAST
25142	2014	FALL	20	76	257379	26.14	6.23	64	2	EAST
25142	2014	FALL	20	76	257382		6.17	66.5	2	EAST
25142	2014	FALL	20	76	257384	22.21	5.49	62.4	1	EAST
25142	2014	FALL	20	76	257385	25.73	6.51	66.1	2	EAST
25142	2014	FALL	20	76	257386	24.32	5.76	61.4	1	EAST
25142	2014	FALL	21	76	257389	24.59	6.01	62.2	2	EAST
25142	2014	FALL	22	76	257390		6.95	80.4	2	EAST
25142	2014	FALL	22	76	257392	23.87	5.89	60.6	1	EAST
25142	2014	FALL	22	76	257393	26.41	5.88	64.2	2	EAST
25142	2014	FALL	22	76	257394	26.43	6.45	69.6	1	EAST
25142	2014	FALL	23	76	257396		5.63	60.8	2	EAST
25142	2014	FALL	23	76	257397		7.58	90.1	2	EAST
25142	2014	FALL	23	76	257398	31.08	6.74	82.9	2	EAST
25142	2014	FALL	23	76	257399		6.2	74.4	2	EAST
25142	2014	FALL	23	76	257400	24.37	5.87	65.1	2	EAST
25142	2014	FALL	23	76	257401	28.63	6.28	76	2	EAST
25142	2014	FALL	23	76	257402	26.5	6.62	71.5	2	EAST
25142	2014	FALL	23	76	257403	24.21	5.7	64.2	1	EAST
25142	2014	FALL	23	76	257404		5.6	69.4	1	EAST
25142	2014	FALL	23	76	257405		6.08	70.4	1	EAST
25142	2014	FALL	23	76	257406	29.08	7.01	86.3	2	EAST
25142	2014	FALL	23	76	257407	33.98	7.88	91.7	2	EAST
25142	2014	FALL	23	76	257408		7.72	88.6	2	EAST
25142	2014	FALL	23	76	257409	30.07	7.04	84.2	2	EAST
25142	2014	FALL	23	76	257410	25.68	6.45	68.7	2	EAST
25142	2014	FALL	24	76	257412	27.24	6.42	75.8	2	EAST
25142	2014	FALL	24	76	257414		5.7	60.8	1	EAST
25142	2014	FALL	24	76	257415		5.52	64.1	1	EAST
25142	2014	FALL	24	76	257416	22.81	5.92	60	2	EAST
25142	2014	FALL	24	76	257417	26.12	6.42	63.8	2	EAST
25142	2014	FALL	25	76	257420	23.18	6.17	61.8	2	EAST
25142	2014	FALL	26	76	257424		5.6	75	2	EAST
25142	2014	FALL	26	76	257425		6.41	75.3	1	EAST
25142	2014	FALL	26	76	257427	29.55	6.82	85.1	2	EAST
25142	2014	FALL	28	76	257432	27.2	6.02	63.2	1	EAST
25142	2014	FALL	28	76	257433		5.78	70.6	1	EAST
25142	2014	FALL	28	76	257434	24.28	6.44	62.8	1	EAST
25142	2014	FALL	28	76	257435	27.11	6.2	70.8	1	EAST
25142	2014	FALL	28	76	257436	29.94	6.92	85.4	2	EAST
201602	2016	SPRING	215	76	255077	26.18	6.18	75.5	2	WEST
201602	2016	SPRING	220	76	257923	26.91	6.34	71	1	WEST
201602	2016	SPRING	221	76	258895	27.59	6.38	71.5	1	WEST
201602	2016	SPRING	256	76	275605	28.38	6.68	75.5	2	WEST
201602	2016	SPRING	258	76	276848	14.55	3.96	34	1	EAST
201602	2016	SPRING	258	76	276880	18.75	5.03	46	2	EAST
201602	2016	SPRING	259	76	277703	16.88	4.32	38.5	2	EAST
201602	2016	SPRING	260	76	278151	25.26	6.1	68	2	EAST
201602	2016	SPRING	260	76	278179	21.01	5.7	52.5	2	EAST
201602	2016	SPRING	261	76	278616	22.93	5.24	53	1	EAST
201602	2016	SPRING	261	76	278637	18.38	4.82	42.5	1	EAST
201602	2016	SPRING	261	76	278671	15.19	4.27	35.5	2	EAST
201602	2016	SPRING	261	76	278706	16.2	4.2	38	2	EAST
201602	2016	SPRING	262	76	279434	19.99	5.26	49	2	EAST
201602	2016	SPRING	262	76	279468	14.67	4.04	34.5	2	EAST
201602	2016	SPRING	263	76	279579	18.95	5.04	43.5	2	EAST
201602	2016	SPRING	264	76	280154	21.46	5.64	53	1	EAST
201602	2016	SPRING	264	76	280178	17.37	4.56	40	1	EAST
201602	2016	SPRING	264	76	280209	14.78	4.16	33.5	1	EAST
201602	2016	SPRING	264	76	280311	17.83	4.49	38.5	1	EAST
201602	2016	SPRING	265	76	280426	26.13	6.4	72.5	2	EAST
201602	2016	SPRING	269	76	283417	27.01	6.77	66	1	EAST
201602	2016	SPRING	310	76	300362	29.87	6.96	87.5	2	EAST
201602	2016	SPRING	313	76	301855	25.52	5.73	69	2	EAST
201602	2016	SPRING	313	76	301870	21.17	5.31	56	2	EAST
201602	2016	SPRING	317	76	305020	29.69	7.4	80.5	2	EAST
201602	2016	SPRING	319	76	305948	24.99	5.88	62	1	EAST
201602	2016	SPRING	320	76	306836	25.28	5.75	65.5	2	EAST
201602	2016	SPRING	320	76	306886	30.01	7.18	83.5	2	EAST
201602	2016	SPRING	322	76	308327	22.84	5.58	62	2	EAST
201602	2016	SPRING	322	76	308348	19.64	4.71	46.5	1	EAST
201602	2016	SPRING	323	76	308993	11.19	3.19	23.5	1	EAST
201602	2016	SPRING	323	76	309309	9.72	2.78	19.5	1	EAST
201602	2016	SPRING	326	76	310889	13.01	3.85	28.5	2	EAST
201602	2016	SPRING	330	76	313664	12.28	3.34	27	1	EAST
201602	2016	SPRING	345	76	321909	8.84	2.67	17	2	WEST
201602	2016	SPRING	346	76	322843	8.42	2.57	16	2	WEST
201602	2016	SPRING	348	76	324314	26.87	6.35	70	2	WEST
201602	2016	SPRING	353	76	326955	32.82	7.94	98	2	WEST
201602	2016	SPRING	370	76	339296	9.73	2.99	20.5	1	WEST
201602	2016	SPRING	370	76	339311	8.8	2.58	17	1	WEST
201602	2016	SPRING	374	76	344472	9.58	2.76	19	1	WEST
201602	2016	SPRING	374	76	344738	10.78	3.21	21.5	1	WEST
201604	2016	FALL	248	76	111446	20.2	5.21	51	1	EAST
201604	2016	FALL	250	76	112724	33.09	7.28	91.5	1	EAST
201604	2016	FALL	253	76	114784	25.94	6.7	75	1	EAST
201604	2016	FALL	314	76	143417	22.38	5.84	60.5	2	EAST
201604	2016	FALL	314	76	143489	19.47	4.8	43.5	2	EAST
201604	2016	FALL	317	76	145013	22.97	5.55	57	2	WEST
201604	2016	FALL	317	76	145020	26.82	6.01	67	2	WEST
201604	2016	FALL	317	76	145561	15.7	4.13	35	1	WEST
201604	2016	FALL	322	76	149102	14.53	4.12	33	1	WEST
201604	2016	FALL	335	76	160312	15.09	4.11	34.5	2	WEST
201604	2016	FALL	336	76	160829	11.56	3.16	25.5	2	WEST
201604	2016	FALL	339	76	163198	11.73	3.29	26	1	WEST
201604	2016	FALL	346	76	170852	25.01	6.06	64	1	WEST
201604	2016	FALL	352	76	173884	19.9	4.92	47.5	1	WEST
201604	2016	FALL	352	76	173926	17.23	4.51	41.5	1	WEST
201604	2016	FALL	353	76	174365	23.14	5.47	57.5	1	WEST
201604	2016	FALL	356	76	176989	29.21	6.81	79	2	WEST
201604	2016	FALL	358	76	178482	27.58	6.85	77.5	2	EAST
201604	2016	FALL	359	76	178989	15.24	4.44	38	2	EAST
201604	2016	FALL	359	76	179019	26.13	6.55	74	2	EAST
201604	2016	FALL	359	76	179047	30.26	7.15	91	2	EAST
201604	2016	FALL	368	76	186247	17.55	4.5	41.5	2	WEST
201604	2016	FALL	379	76	194271	27.54	6.14	71.5	2	WEST
201604	2016	FALL	381	76	195100	29.39	7.4	71.5	2	EAST
201604	2016	FALL	382	76	195743	24.72	5.86	70.5	2	EAST
201604	2016	FALL	382	76	195856	27.2	6.23	77.5	2	EAST
201604	2016	FALL	383	76	196489	26.45	6.15	72	2	EAST
201604	2016	FALL	391	76	200776	26.77	6.05	71	1	EAST
201604	2016	FALL	391	76	200777	25.3	6.4	66	1	EAST
201604	2016	FALL	391	76	200916	31.75	7.23	87.5	2	EAST
201604	2016	FALL	391	76	201036	28.75	7.89	78.5	2	EAST
201604	2016	FALL	393	76	202326	20.19	4.91	50	2	EAST
201604	2016	FALL	400	76	206496	11	3.2	24	2	WEST
201604	2016	FALL	403	76	208051	10.78	3.03	22.5	1	WEST
201604	2016	FALL	417	76	217653	28.3	7.55	97.5	2	WEST
201604	2016	FALL	417	76	217654	34.82	8.01	103	2	WEST
201604	2016	FALL	417	76	217656	31.05	6.99	90.5	2	WEST
201604	2016	FALL	417	76	217658	32.26	7.69	95	2	WEST
201604	2016	FALL	417	76	217661	28.91	6.85	76.5	2	WEST
201604	2016	FALL	417	76	217663	30.27	7.19	85.5	2	WEST
201604	2016	FALL	417	76	217664	27.51	6.95	89.5	2	WEST
201604	2016	FALL	417	76	217665	29.5	7.58	100	2	WEST
201604	2016	FALL	417	76	217666	30.8	7.2	83	2	WEST
201604	2016	FALL	417	76	217667	27.04	6.97	87	2	WEST
201604	2016	FALL	417	76	217671	30.25	7.2	99	2	WEST
201604	2016	FALL	417	76	217674	29.27	7.41	91.5	2	WEST
201604	2016	FALL	417	76	217676	33.58	8.39	116	2	WEST
201604	2016	FALL	417	76	217678	31.34	7.49	87	2	WEST
201604	2016	FALL	417	76	217679	29.9	7.28	84	2	WEST
201604	2016	FALL	417	76	217680	31.24	6.91	85.5	2	WEST
201604	2016	FALL	417	76	217683	30.48	6.83	90	2	WEST
201604	2016	FALL	417	76	217685	26.84	6.78	80	2	WEST
201604	2016	FALL	417	76	217688	27.11	7.11	94	2	WEST
201604	2016	FALL	417	76	217692	33.15	7.95	94	2	WEST
201604	2016	FALL	417	76	217693	31.8	7.17	95.5	2	WEST
201604	2016	FALL	417	76	217694	30.16	7.23	81.5	2	WEST
201604	2016	FALL	417	76	217695	28.53	6.8	86	2	WEST
201604	2016	FALL	417	76	217701	36.8	7.54	109	2	WEST
201604	2016	FALL	417	76	217702	30.62	7.31	78	2	WEST
201604	2016	FALL	417	76	217704	32.01	7.55	97	2	WEST
201604	2016	FALL	417	76	217705	31.67	7.61	97	2	WEST
201604	2016	FALL	417	76	217707	30.42	7.29	95.5	2	WEST
201604	2016	FALL	417	76	217709	32.36	7.17	97	2	WEST
201604	2016	FALL	417	76	217712	31.42	7.22	92	2	WEST
201604	2016	FALL	417	76	217713	29.33	7.08	90.5	2	WEST
201604	2016	FALL	417	76	217715	29	7.53	89.5	2	WEST
201604	2016	FALL	417	76	217717	28.84	6.58	97.5	2	WEST
201604	2016	FALL	417	76	217720	28.11	6.84	87.5	2	WEST
201604	2016	FALL	417	76	217721	31.01	7.6	92.5	2	WEST
201604	2016	FALL	417	76	217723	32.67	7.55	94	2	WEST
201604	2016	FALL	417	76	217729	27.49	6.95	85	1	WEST
201604	2016	FALL	417	76	217730	28.86	7.07	86.5	2	WEST
201604	2016	FALL	417	76	217733	29.79	6.86	87.5	2	WEST
201604	2016	FALL	417	76	217737	27.19	6.77	73	1	WEST
201604	2016	FALL	417	76	217742	29.82	7.53	81.5	2	WEST
201604	2016	FALL	417	76	217743	29.58	7.25	91	2	WEST
201604	2016	FALL	417	76	217744	28.56	6.95	77.5	2	WEST
201604	2016	FALL	417	76	217746	32.13	7.61	91.5	2	WEST
201604	2016	FALL	417	76	217747	31.6	7.53	90	2	WEST
201604	2016	FALL	417	76	217748	27.84	7.2	87.5	2	WEST
201604	2016	FALL	417	76	217751	32.6	7.72	88	2	WEST
201604	2016	FALL	417	76	217756	29.6	6.51	82	1	WEST
201604	2016	FALL	417	76	217811	29.89	7.51	85.5	2	WEST
201604	2016	FALL	417	76	217879	27.55	6.59	91	2	WEST
201604	2016	FALL	417	76	217888	41.01	8.07	111	2	WEST
201604	2016	FALL	417	76	217915	28.46	7.43	84.5	2	WEST
201604	2016	FALL	417	76	217934	31.67	8.51	95.5	2	WEST
201604	2016	FALL	417	76	217942	28.04	6.85	88.5	2	WEST
201604	2016	FALL	417	76	217948	39.74	8.01	117	2	WEST
24172	2017	FALL	11	76	304046	29.91	7.91	88.4	2	WEST
24172	2017	FALL	11	76	304039	30.12	7.06	89.8	2	WEST
24172	2017	FALL	11	76	304077	30.47	7.5	100.4	2	WEST
24172	2017	FALL	11	76	304044	30.63	6.88	93.3	2	WEST
24172	2017	FALL	11	76	304053	30.77	7.21	89.8	2	WEST
24172	2017	FALL	11	76	304076	31.9	7.67	103.4	2	WEST
24172	2017	FALL	11	76	304036	32.52	7.63	96.2	2	WEST
24172	2017	FALL	11	76	304097	32.64	7.46	98.1	2	WEST
24172	2017	FALL	11	76	304047	32.69	7.16	87.1	2	WEST
24172	2017	FALL	11	76	304042	33.2	7.28	100.1	2	WEST
24172	2017	FALL	11	76	304070	33.47	7.72	111.9	2	WEST
24172	2017	FALL	11	76	304041	33.8	8.46	106.4	2	WEST
24172	2017	FALL	11	76	304088	33.88	8.02	91.1	2	WEST
24172	2017	FALL	22	76	304229	34.34	7.88	110.6	2	EAST
25172	2017	FALL	11	76	304772	34.45	7.38	97.5	2	EAST
24172	2017	FALL	11	76	304073	34.77	7.93	101	2	WEST
24172	2017	FALL	11	76	304071	34.99	7.81	100.9	2	WEST
24172	2017	FALL	11	76	304094	35.09	8.32	99.5	2	WEST
24172	2017	FALL	11	76	304087	35.14	7.97	106.8	2	WEST
24172	2017	FALL	11	76	304066	35.21	8.35	107	2	WEST
25172	2017	FALL	21	76	304655	35.41	7.91	100.7	2	EAST
25172	2017	FALL	21	76	304648	35.42	7.84	110	2	EAST
24172	2017	FALL	11	76	304064	35.71	7.69	96.8	2	WEST
24172	2017	FALL	11	76	304037	35.95	7.84	98.5	2	WEST
24172	2017	FALL	11	76	304093	36.07	8.32	104.1	2	WEST
24172	2017	FALL	11	76	304096	36.17	7.32	100.3	2	WEST
24172	2017	FALL	11	76	304038	36.74	8.71	117.8	2	WEST
25172	2017	FALL	11	76	304766	36.76	7.86	111	2	EAST
25172	2017	FALL	11	76	304714	36.82	7.89	116	2	EAST
24172	2017	FALL	11	76	304043	37.51	8.24	112.5	2	WEST
24172	2017	FALL	11	76	304055	37.59	7.77	115.1	2	WEST
24172	2017	FALL	11	76	304092	37.69	8.49	112.1	2	WEST
24172	2017	FALL	11	76	304051	38.07	8.88	101	2	WEST
