# Supplementary figures and images for: What bycatch tells us about the diet of harbor and gray seals and overlap with commercial fishermen
Source: Frontiers journal article supplement (doi:10.3389/fcosc.2024.1377673), 2024-04-10

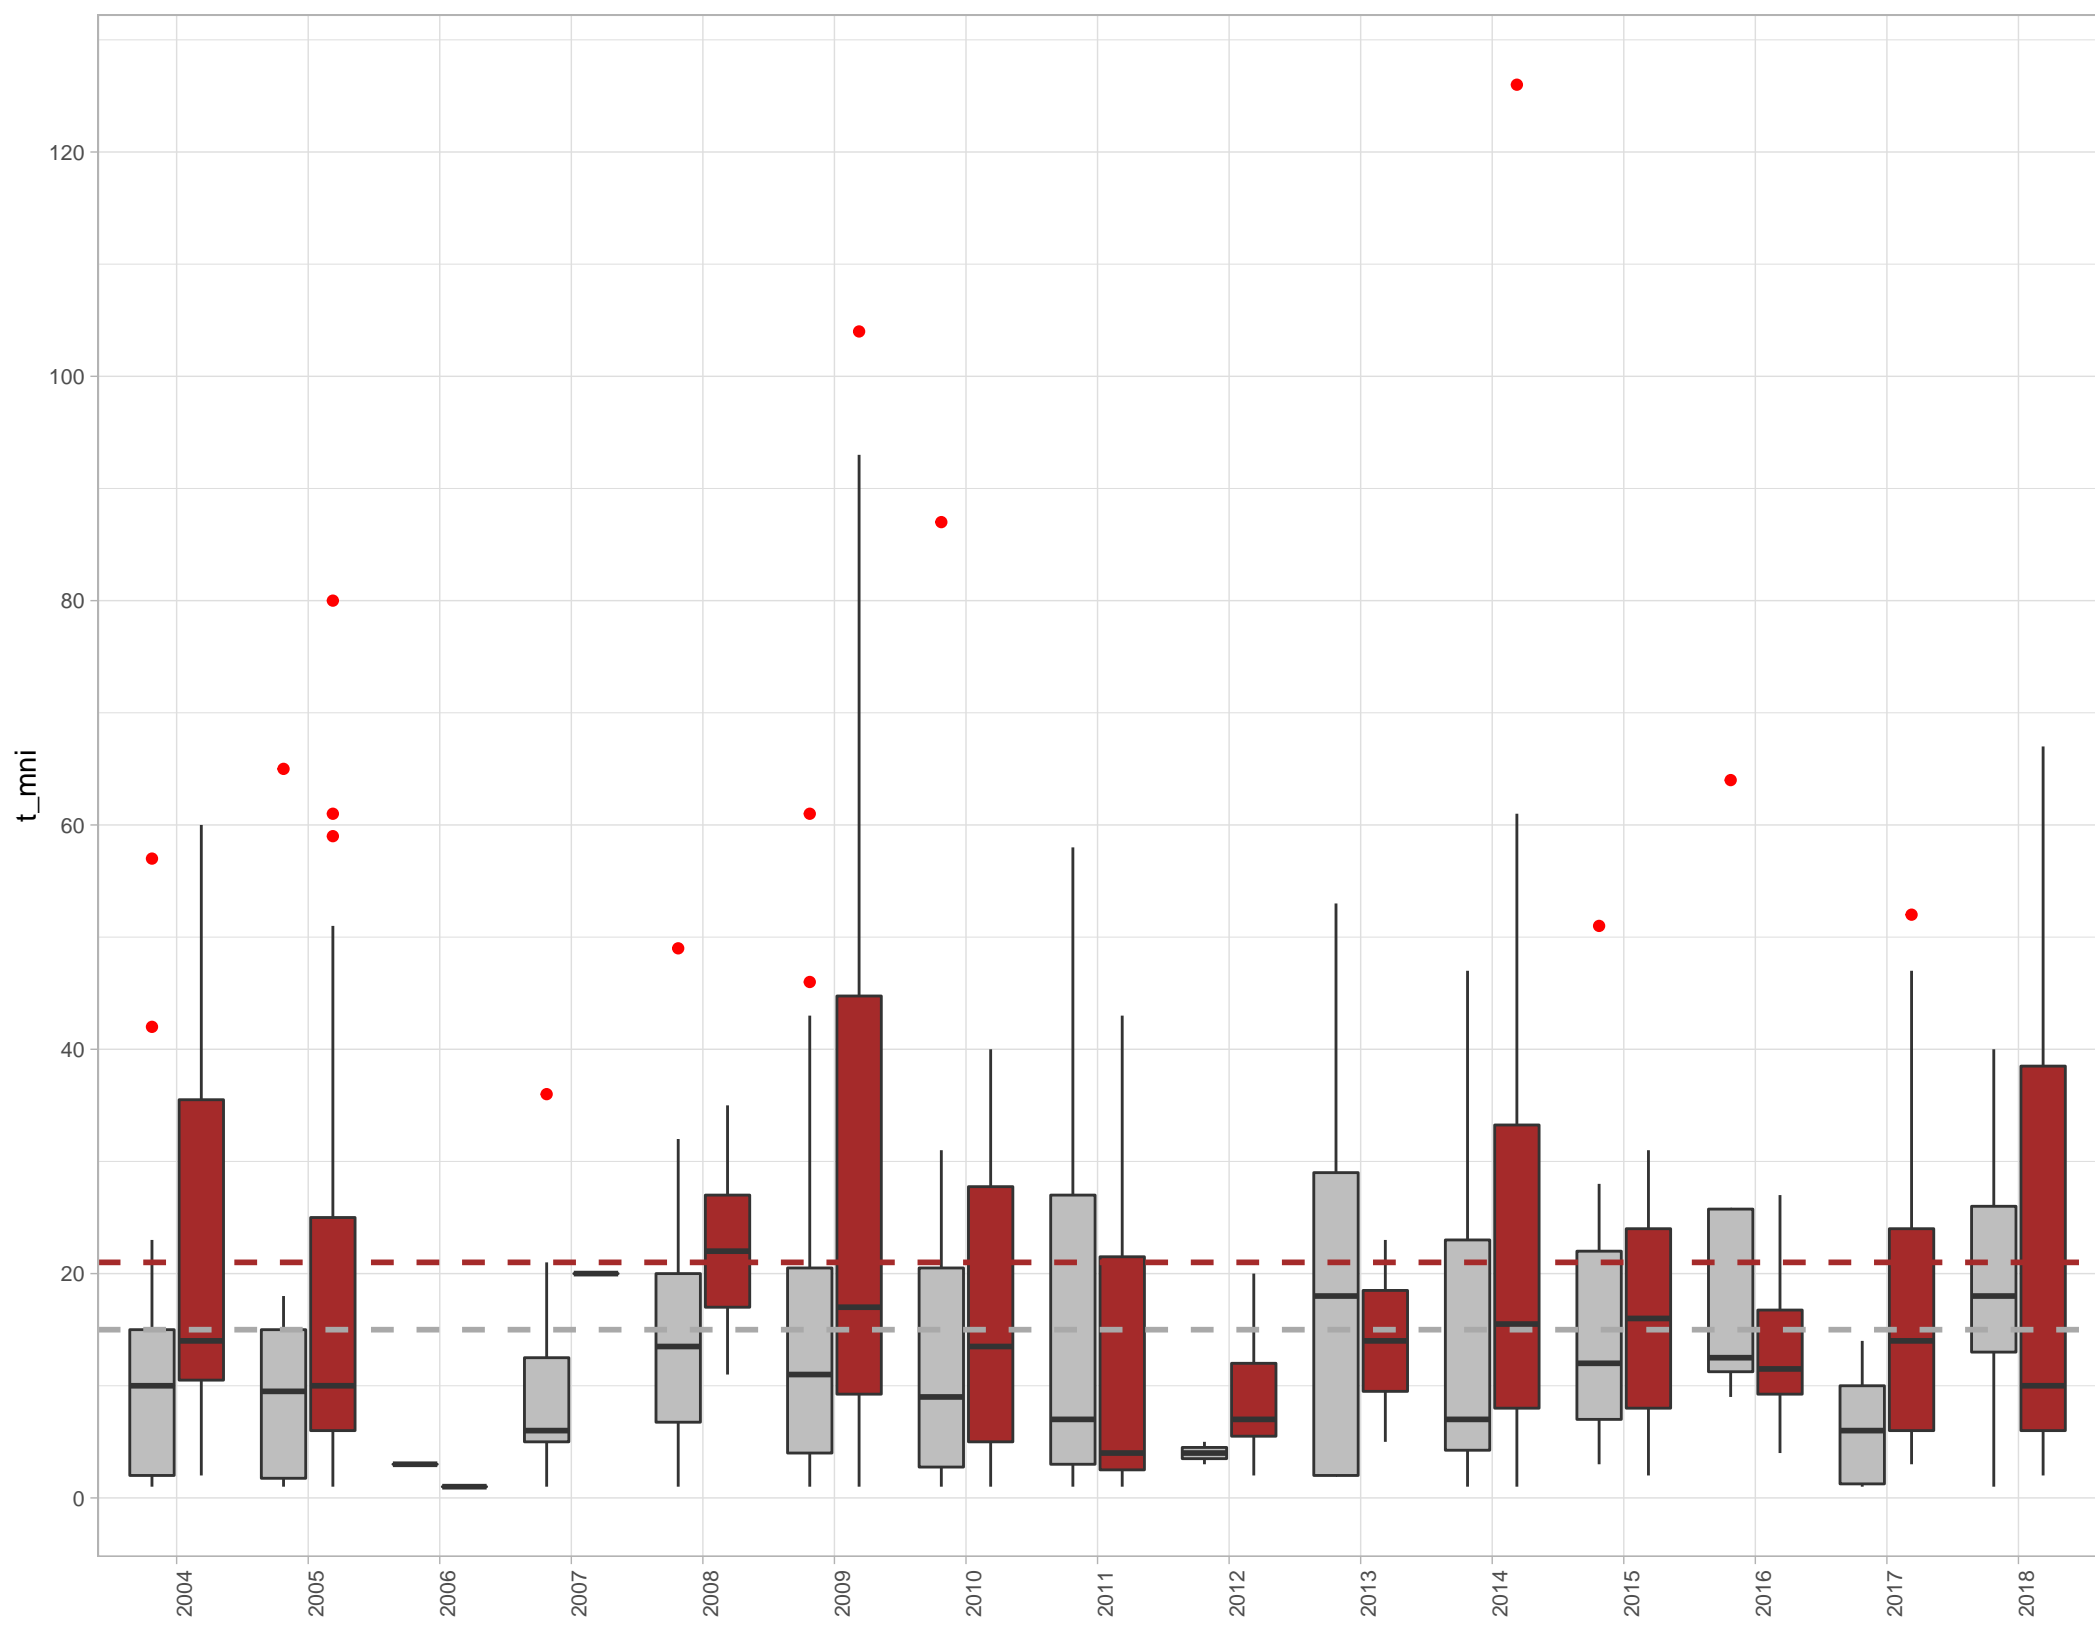

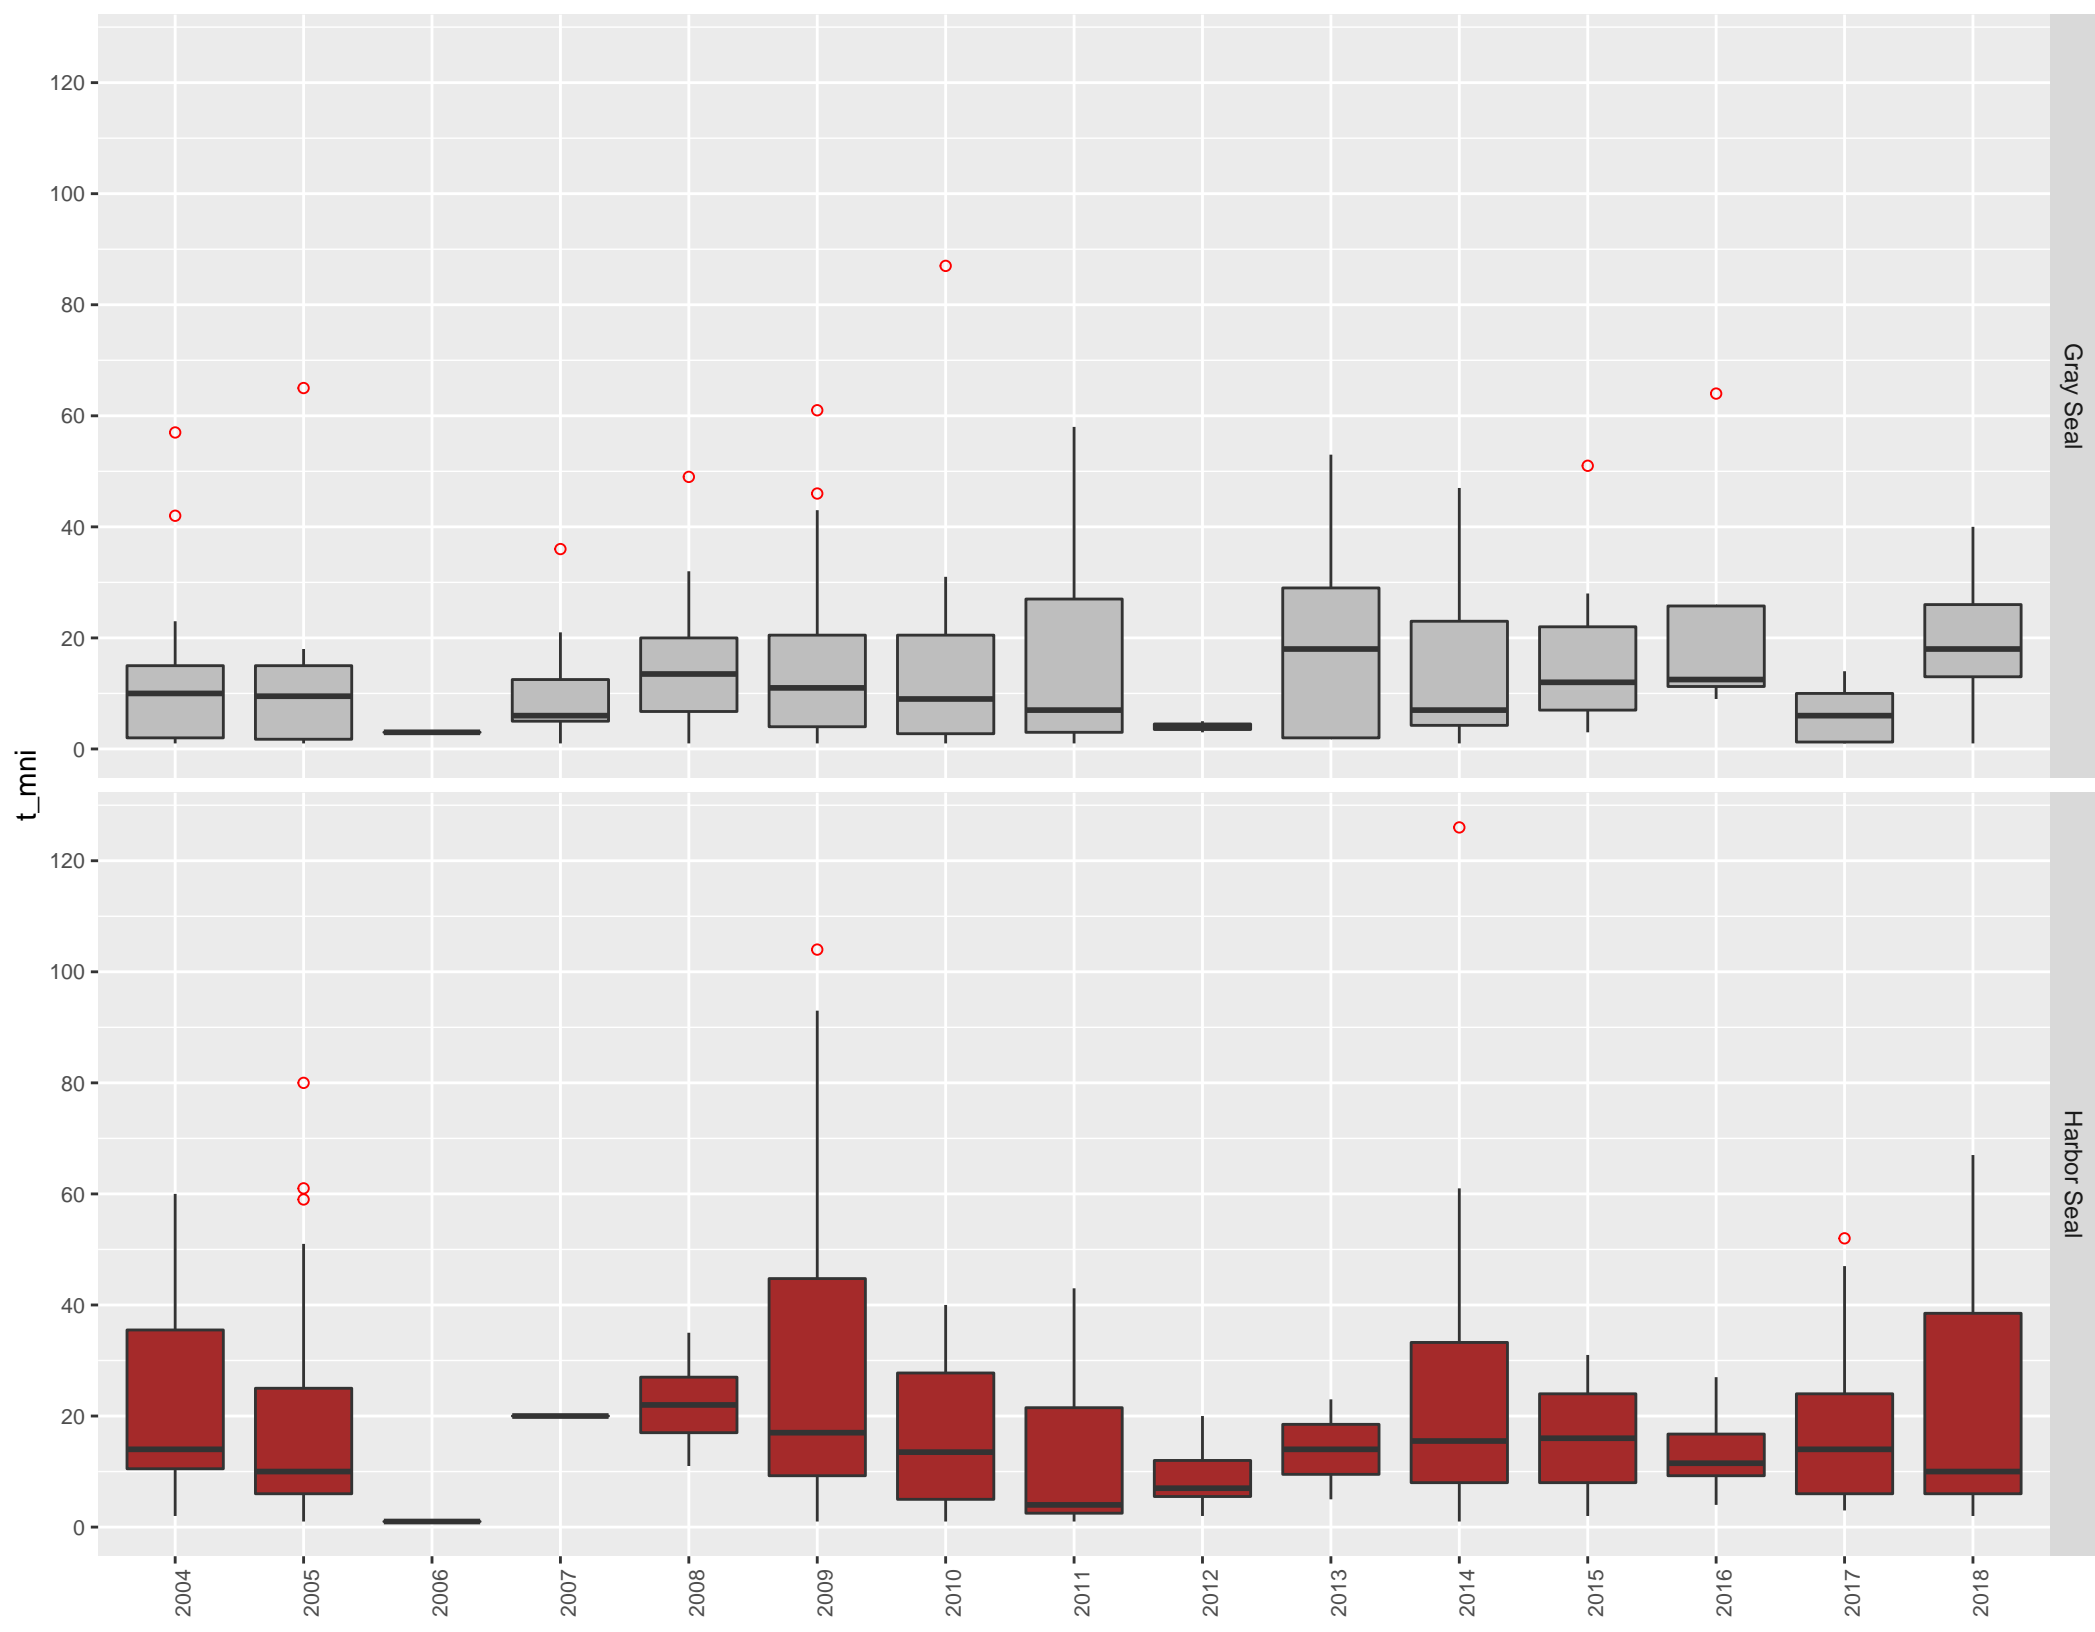

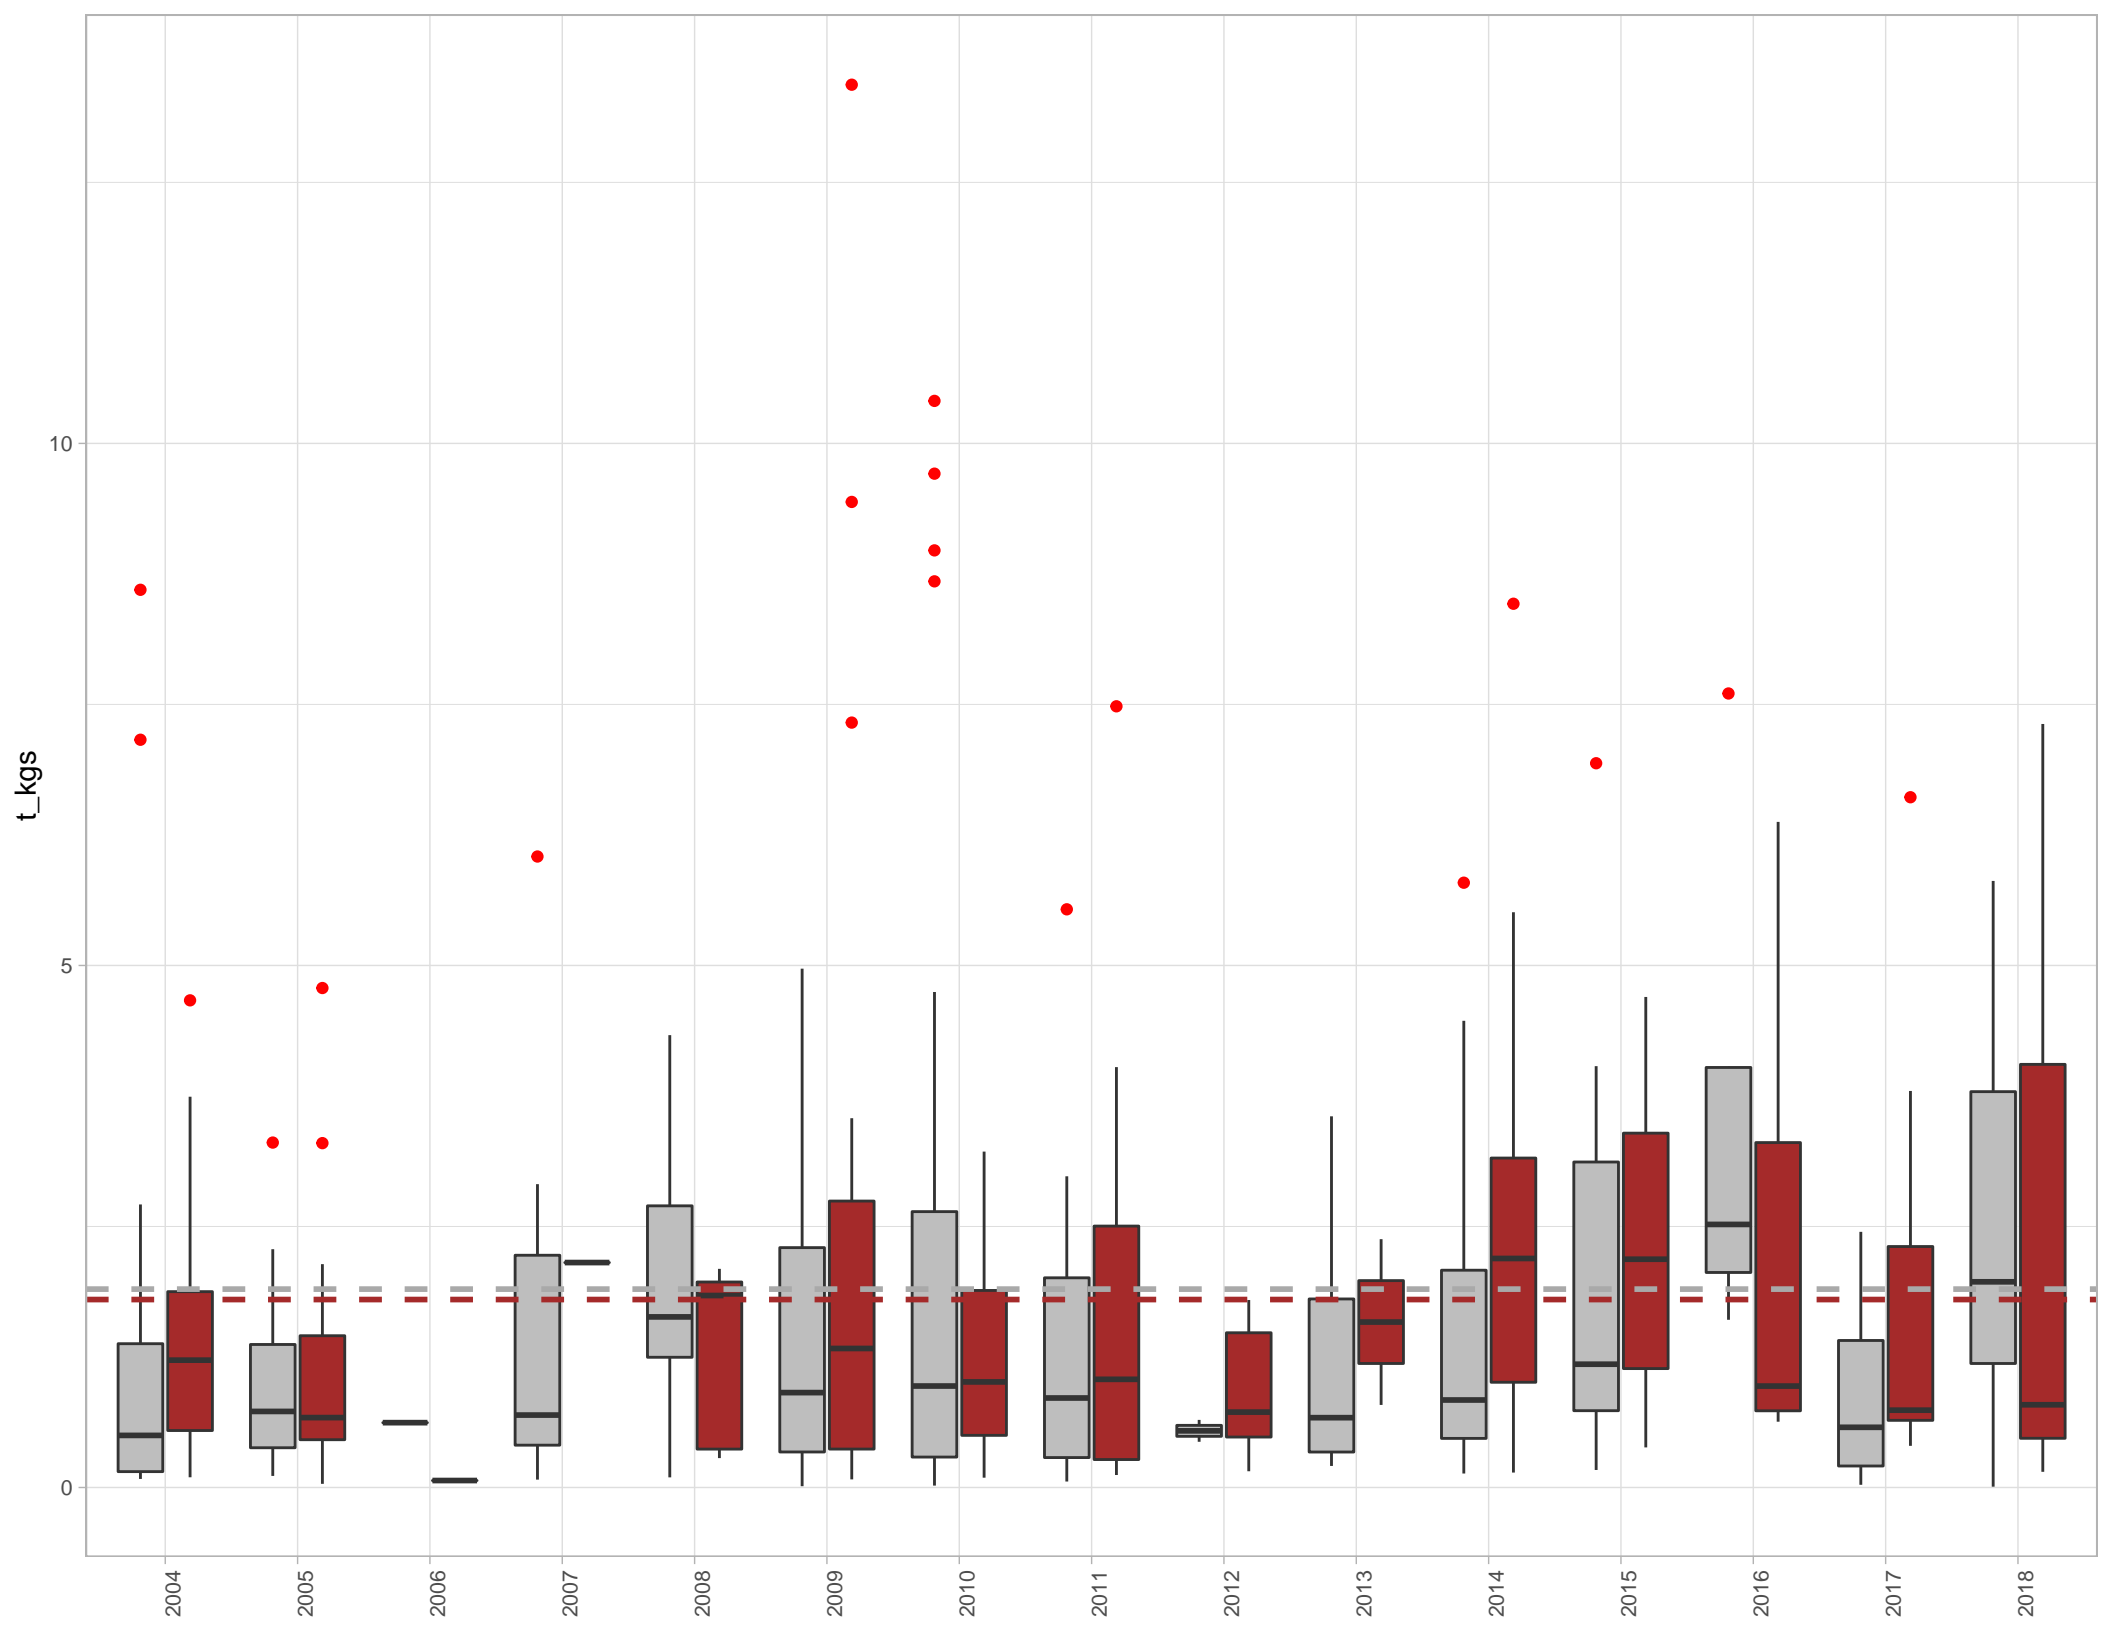

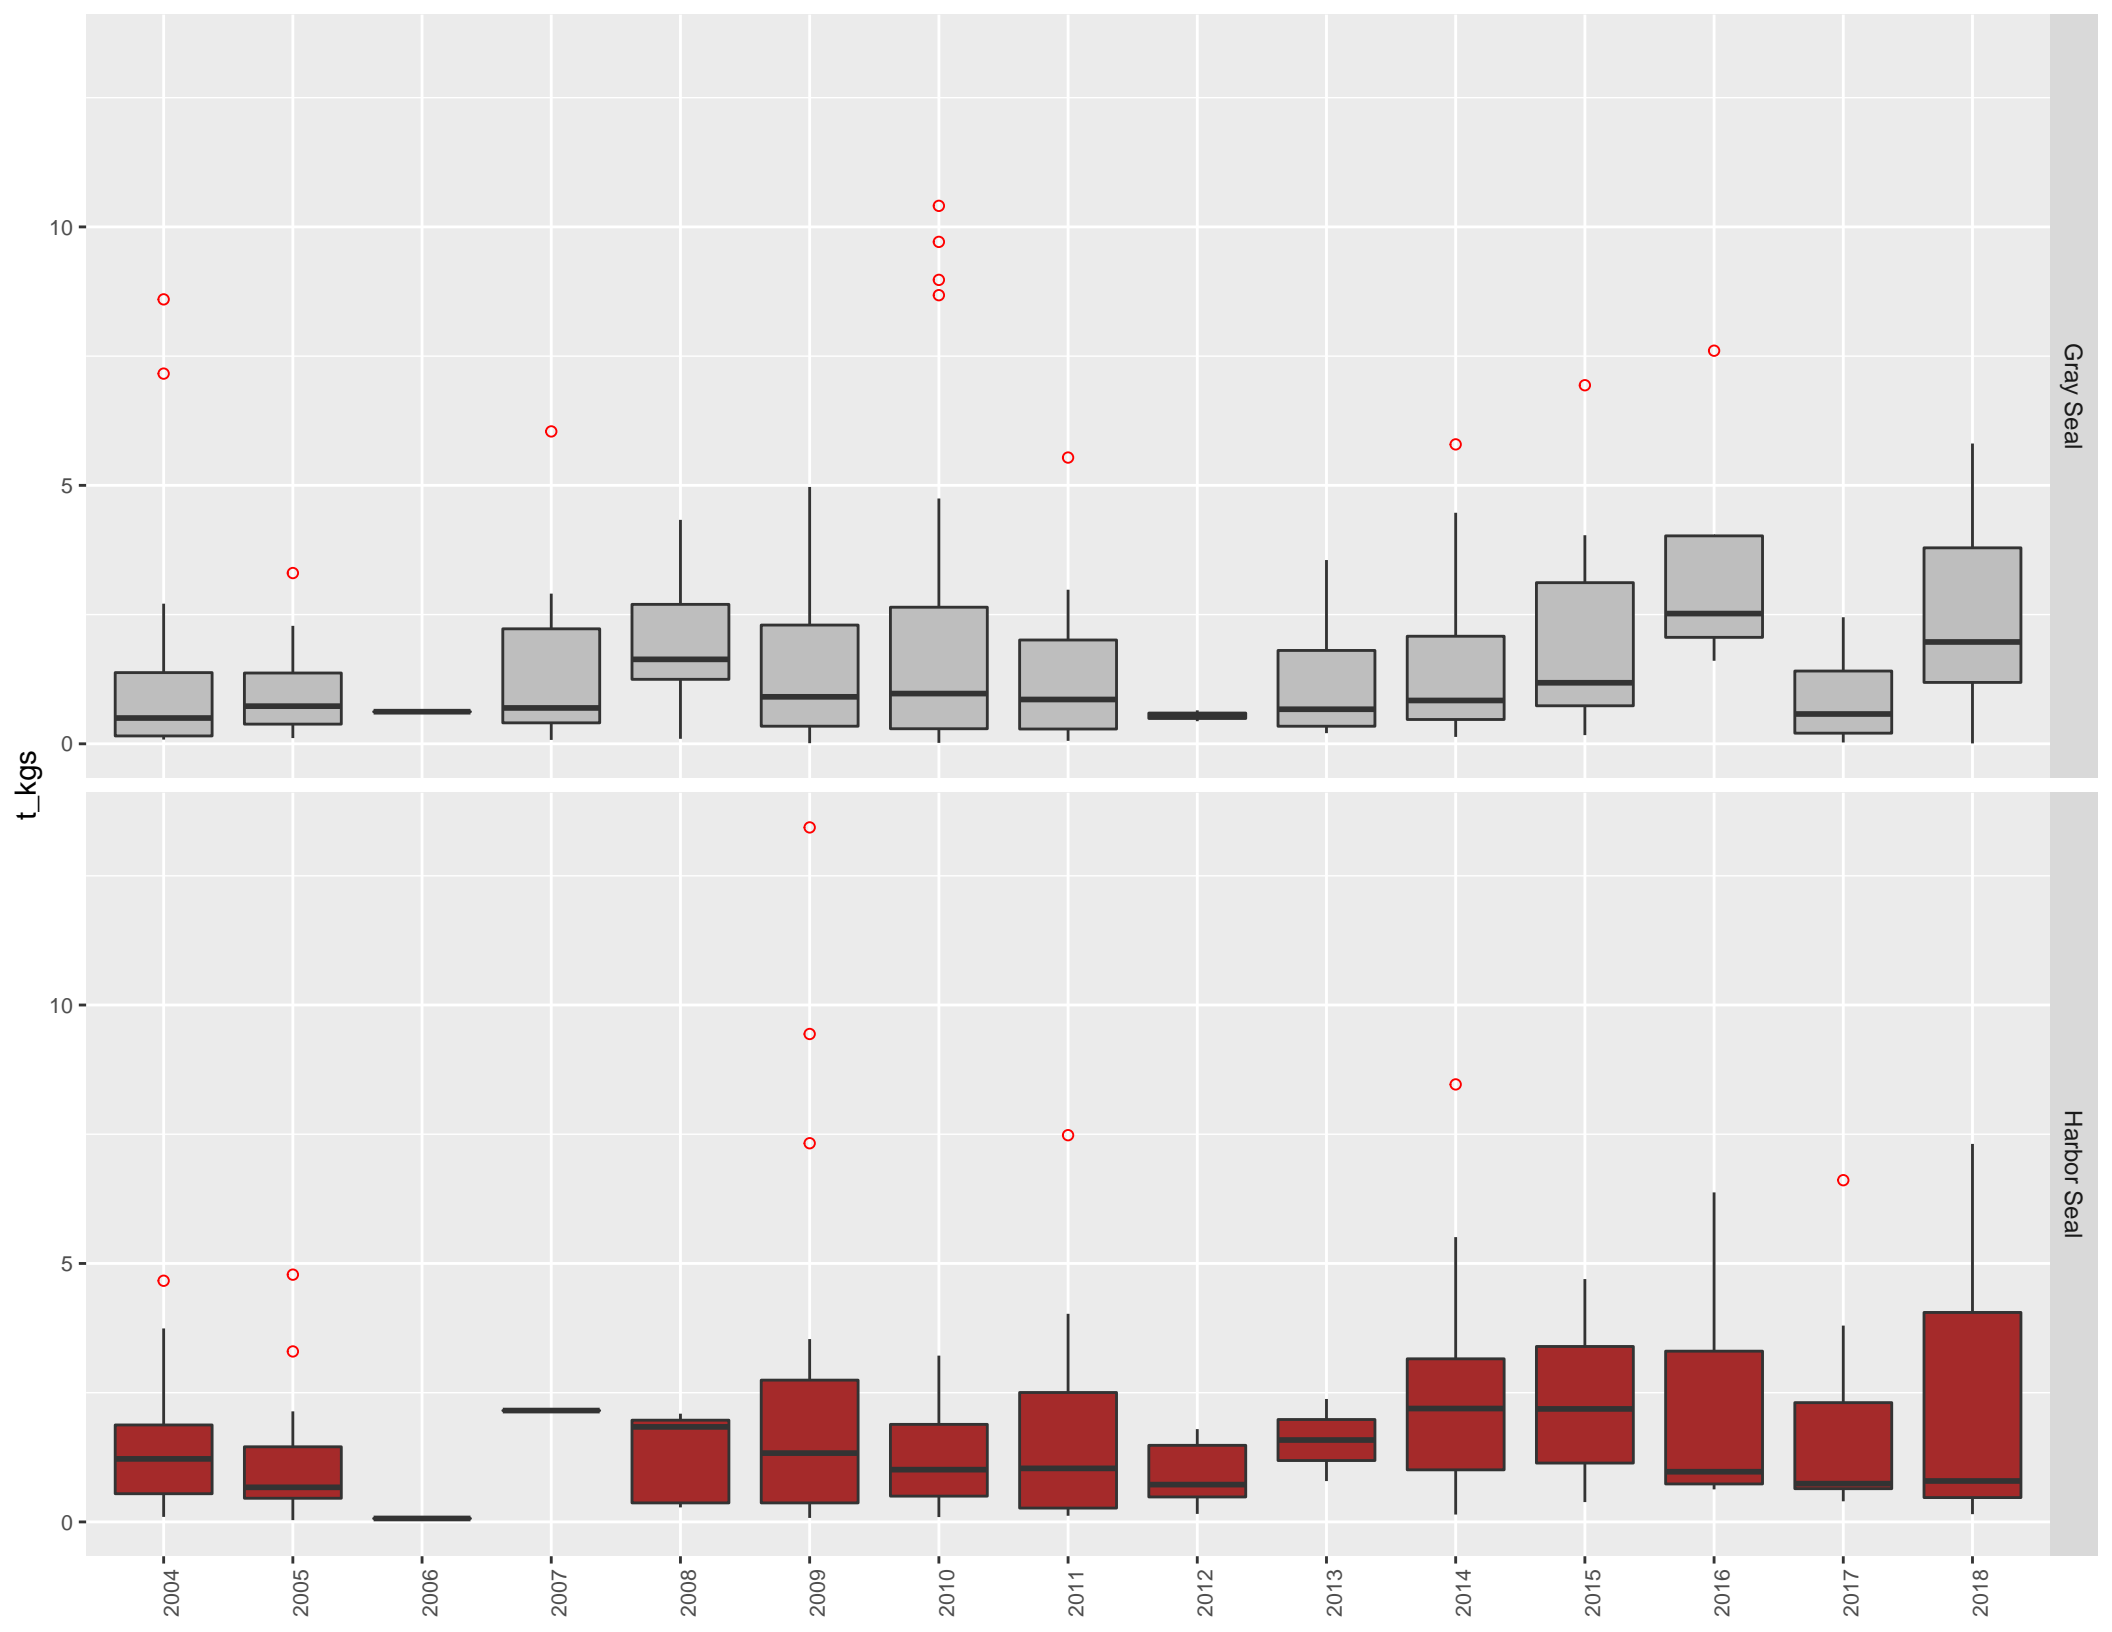

Supplement: Data_Sheet_1.ZIP [file Data_Sheet_1.ZIP]
